# Supplementary material for: Microhydration of verbenone: how the chain of water molecules adapts its structure to the host molecule
Source: Royal Society of Chemistry journal article supplement (doi:10.1039/c9cp06678k), 2020-01-01
Supplement: c9cp06678k1.pdf [file c9cp06678k1.pdf]

Supporting Information for :

# Microhydration of verbenone : how the chain of water molecules adapts its structure to the host molecule

M. Chrayteh, A. Savoia, T. R. Huet and P. Dréan

University of Lille, CNRS, UMR 8523 - PhLAM - Physique des Lasers, Atomes et Molécules, F-59000  
Lille, France

# Contents

## List of Figures

- S1 Optimized structure (MP2/6-311++G(d,p)) of the 1w-I complex of verbenone with one water molecule. Distances in Å, angles in °. The purple dashed lines indicate the shortest distances between the water oxygen atom and some hydrogen atoms of verbenone. . . . S6
- S2 Optimized structure (MP2/6-311++G(d,p)) of the 1w-II complex of verbenone with one water molecule. Distances in Å, angles in °. The purple dashed lines indicate the shortest distances between the water oxygen atom and some hydrogen atoms of verbenone. . . . S14
- S3 Optimized structure (MP2/6-311++G(d,p)) of the lowest energy conformer 2w-I of the dihydrates of verbenone. Distances in Å, angles in °. The purple dashed lines indicate the shortest distances between the water oxygen atom and some hydrogen atoms of verbenone. . . . . S21
- S4 Two optimized (MP2/6-311++G(d,p)) close structures of the highest energy conformer 2w-II, differing by the orientation of the water molecules. Lengths expressed in Å, angles in °. . . . . S31
- S5 The 4 optimized structures of the trihydrate of verbenone calculated at the MP2 / 6-311++G(d,p) level using Gaussian 16. Energies (including ZPE corrections) shown into parentheses are energies relative to the lowest energy conformer 3w-I. The pictures show how the terminal oxygen atom O<sub>3</sub> of the chain of water molecules is anchored to verbenone by Van der Waals interactions, with lengths expressed in Å and angles in °. The dihedral angle  $\tau(\text{O}_0\text{O}_1\text{O}_2\text{O}_3)$  of the four atoms of oxygen is given for each conformer. . . S43
- S6 NCI plots showing the interactions in the mono and dihydrates of verbenone. . . . . S44
- S7 NCI plots showing the interactions in the trihydrates of verbenone. . . . . S45

## List of Tables

- S1 Experimental rotational and quartic centrifugal distortion constants of the normal and of the H<sub>2</sub><sup>18</sup>O substituted species of the 1w-I hydrate of verbenone. . . . . S7

|     |                                                                                                                                                                                                                                             |     |
|-----|---------------------------------------------------------------------------------------------------------------------------------------------------------------------------------------------------------------------------------------------|-----|
| S2  | Experimental coordinates (in Å, in the principal axes systems) of the water oxygen atom O <sub>1</sub> in the 1w-I hydrate of verbenone, along with those obtained by <i>ab initio</i> and DFT calculations. . . . .                        | S7  |
| S3  | Effective and quantum chemistry parameters of the verbenone monohydrate 1w-I. . . . .                                                                                                                                                       | S8  |
| S4  | Measured frequencies ( $\nu_{\text{obs.}}$ ) and residuals ( $\nu_{\text{obs.}} - \nu_{\text{calc.}}$ ) in MHz of the monohydrate of verbenone 1w-I. . . . .                                                                                | S9  |
| S5  | Measured frequencies ( $\nu_{\text{obs.}}$ ) and residuals ( $\nu_{\text{obs.}} - \nu_{\text{calc.}}$ ) in MHz of the monohydrate of verbenone 1w-I labeled with <sup>18</sup> O. . . . .                                                   | S12 |
| S6  | Experimental rotational and quartic centrifugal distortion constants of the normal and of H <sub>2</sub> <sup>18</sup> O substituted species of the 1w-II hydrate of verbenone. . . . .                                                     | S14 |
| S7  | Experimental coordinates (in Å, in the principal axes systems) of the water oxygen atom O <sub>1</sub> in the 1w-II complex of verbenone, along with those obtained by <i>ab initio</i> and DFT calculations. . . . .                       | S15 |
| S8  | Effective and quantum chemistry parameters of verbenone monohydrate 1w-II. . . . .                                                                                                                                                          | S15 |
| S9  | Measured frequencies ( $\nu_{\text{obs.}}$ ) and residuals ( $\nu_{\text{obs.}} - \nu_{\text{calc.}}$ ) in MHz of the monohydrate of verbenone 1w-II. . . . .                                                                               | S16 |
| S10 | Measured frequencies ( $\nu_{\text{obs.}}$ ) and residuals ( $\nu_{\text{obs.}} - \nu_{\text{calc.}}$ ) in MHz of the monohydrate of verbenone 1w-II labeled with <sup>18</sup> O. . . . .                                                  | S19 |
| S11 | Experimental rotational and quartic centrifugal distortion constants of the normal and of the H <sub>2</sub> <sup>18</sup> O substituted species of the dihydrate of verbenone 2w-I. . . . .                                                | S22 |
| S12 | Experimental coordinates (in Å, in the principal axes systems) of the water oxygen atoms O <sub>1</sub> and O <sub>2</sub> in the 2w-I complex of verbenone, along with those obtained by <i>ab initio</i> and DFT calculations. . . . .    | S23 |
| S13 | The substitution and effective structural parameters of the verbenone dihydrate 2w-I compared with those optimized by quantum chemistry. . . . .                                                                                            | S23 |
| S14 | Measured frequencies ( $\nu_{\text{obs.}}$ ) and residuals ( $\nu_{\text{obs.}} - \nu_{\text{calc.}}$ ) in MHz of the dihydrate of verbenone 2w-I. . . . .                                                                                  | S24 |
| S15 | Measured frequencies ( $\nu_{\text{obs.}}$ ) and residuals ( $\nu_{\text{obs.}} - \nu_{\text{calc.}}$ ) in MHz of the dihydrate of verbenone 2w-I with the <sup>16</sup> O <sub>1</sub> atom substituted by a <sup>18</sup> O atom. . . . . | S27 |
| S16 | Measured frequencies ( $\nu_{\text{obs.}}$ ) and residuals ( $\nu_{\text{obs.}} - \nu_{\text{calc.}}$ ) in MHz of the dihydrate of verbenone 2w-I with the <sup>16</sup> O <sub>2</sub> atom substituted by a <sup>18</sup> O atom. . . . . | S28 |

|     |                                                                                                                                                                                                                                                                |     |
|-----|----------------------------------------------------------------------------------------------------------------------------------------------------------------------------------------------------------------------------------------------------------------|-----|
| S17 | Measured frequencies ( $\nu_{\text{obs.}}$ ) and residuals ( $\nu_{\text{obs.}} - \nu_{\text{calc.}}$ ) in MHz of the dihydrate of verbenone 2w-I with the $^{16}\text{O}_1$ and $^{16}\text{O}_2$ atoms substituted by $^{18}\text{O}$ atoms. . . . .         | S29 |
| S18 | Experimental rotational constants of the observed conformer of the dihydrate of verbenone 2w-II, and comparison with the sets of computed constants corresponding to the two possible structures 2w-II(a) and 2w-II(b) represented Fig. S4. . . . .            | S32 |
| S19 | Experimental rotational and quartic centrifugal distortion constants of the normal and of the $\text{H}_2^{18}\text{O}$ substituted species of the complex of verbenone 2w-II. . . . .                                                                         | S34 |
| S20 | Experimental coordinates (in Å, in the principal axes systems) of the water oxygen atoms in the observed conformer of the dihydrate of verbenone 2w-II, along with those obtained by <i>ab initio</i> and DFT calculations for the conformer 2w-II(a). . . . . | S35 |
| S21 | The substitution and effective structural parameters of the observed verbenone dihydrate 2w-II, along with those optimized by quantum chemistry for the conformer 2w-II(a).S35                                                                                 |     |
| S22 | Experimental coordinates (in Å, in the principal axes systems) of the water oxygen atoms in the observed dihydrate of verbenone 2w-II, compared with those obtained by <i>ab initio</i> and DFT calculations for the conformer 2w-II(b). . . . .               | S36 |
| S23 | The substitution and effective structural parameters of the observed verbenone dihydrate 2w-II, along with those optimized by quantum chemistry for the conformer 2w-II(b). . . . .                                                                            | S36 |
| S24 | Measured frequencies ( $\nu_{\text{obs.}}$ ) and residuals ( $\nu_{\text{obs.}} - \nu_{\text{calc.}}$ ) in MHz of the dihydrate of verbenone 2w-II. . . . .                                                                                                    | S37 |
| S25 | Measured frequencies ( $\nu_{\text{obs.}}$ ) and residuals ( $\nu_{\text{obs.}} - \nu_{\text{calc.}}$ ) in MHz of the dihydrate of verbenone 2w-II with the $^{16}\text{O}_1$ atom substituted by a $^{18}\text{O}$ atom. . . . .                              | S39 |
| S26 | Measured frequencies ( $\nu_{\text{obs.}}$ ) and residuals ( $\nu_{\text{obs.}} - \nu_{\text{calc.}}$ ) in MHz of the dihydrate of verbenone 2w-II with the $^{16}\text{O}_2$ atom substituted by a $^{18}\text{O}$ atom. . . . .                              | S40 |
| S27 | Measured frequencies ( $\nu_{\text{obs.}}$ ) and residuals ( $\nu_{\text{obs.}} - \nu_{\text{calc.}}$ ) in MHz of the dihydrate of verbenone 2w-II with the $^{16}\text{O}_1$ and $^{16}\text{O}_2$ atoms substituted by $^{18}\text{O}$ atoms. . . . .        | S41 |
| S28 | Calculated rotational constants, dipole moments and relative energies (including ZPE corrections) of the 4 trihydrates of verbenone shown Figure S5. . . . .                                                                                                   | S46 |
| S29 | Experimental rotational and quartic centrifugal distortion constants of the normal and of the $\text{H}_2^{18}\text{O}$ substituted species of the trihydrate of verbenone 3w-I. . . . .                                                                       | S47 |

|     |                                                                                                                                                                                                                                                           |     |
|-----|-----------------------------------------------------------------------------------------------------------------------------------------------------------------------------------------------------------------------------------------------------------|-----|
| S30 | Experimental coordinates (in Å, in the principal axes systems) of the water oxygen atoms O <sub>1</sub> , O <sub>2</sub> and O <sub>3</sub> of the verbenone trihydrate 3w-I, along with those obtained by <i>ab initio</i> and DFT calculations. . . . . | S48 |
| S31 | The substitution and effective structural parameters of the verbenone trihydrate 3w-I along with those optimized by quantum chemistry. . . . .                                                                                                            | S49 |
| S32 | Measured frequencies ( $\nu_{\text{obs.}}$ ) and residuals ( $\nu_{\text{obs.}} - \nu_{\text{calc.}}$ ) in MHz of the trihydrate of verbenone 3w-I. . . . .                                                                                               | S50 |
| S33 | Measured frequencies ( $\nu_{\text{obs.}}$ ) and residuals ( $\nu_{\text{obs.}} - \nu_{\text{calc.}}$ ) in MHz of the trihydrate of verbenone 3w-I with the O <sub>1</sub> atom substituted by a <sup>18</sup> O atom. . . . .                            | S53 |
| S34 | Measured frequencies ( $\nu_{\text{obs.}}$ ) and residuals ( $\nu_{\text{obs.}} - \nu_{\text{calc.}}$ ) in MHz of the trihydrate of verbenone 3w-I with the O <sub>2</sub> atom substituted by a <sup>18</sup> O atom. . . . .                            | S54 |
| S35 | Measured frequencies ( $\nu_{\text{obs.}}$ ) and residuals ( $\nu_{\text{obs.}} - \nu_{\text{calc.}}$ ) in MHz of the trihydrate of verbenone 3w-I with the O <sub>3</sub> atom substituted by a <sup>18</sup> O atom. . . . .                            | S55 |
| S36 | Measured frequencies ( $\nu_{\text{obs.}}$ ) and residuals ( $\nu_{\text{obs.}} - \nu_{\text{calc.}}$ ) in MHz of the trihydrate of verbenone 3w-I with the O <sub>1</sub> and O <sub>2</sub> atoms substituted by <sup>18</sup> O atoms. . . . .         | S56 |
| S37 | Measured frequencies ( $\nu_{\text{obs.}}$ ) and residuals ( $\nu_{\text{obs.}} - \nu_{\text{calc.}}$ ) in MHz of the trihydrate of verbenone 3w-I with the O <sub>1</sub> and O <sub>3</sub> atoms substituted by <sup>18</sup> O atoms. . . . .         | S57 |
| S38 | Measured frequencies ( $\nu_{\text{obs.}}$ ) and residuals ( $\nu_{\text{obs.}} - \nu_{\text{calc.}}$ ) in MHz of the trihydrate of verbenone 3w-I with the O <sub>2</sub> and O <sub>3</sub> atoms substituted by <sup>18</sup> O atoms. . . . .         | S58 |
| S39 | Measured frequencies ( $\nu_{\text{obs.}}$ ) and residuals ( $\nu_{\text{obs.}} - \nu_{\text{calc.}}$ ) in MHz of the trihydrate of verbenone 3w-I with all oxygen atoms of water substituted by <sup>18</sup> O atoms. . . . .                           | S59 |
| S40 | Decomposition of the interaction energy between verbenone and water as calculated at the SAPT0 / jun-cc-PVDZ level of theory, values in kJ mol <sup>-1</sup> . . . . .                                                                                    | S60 |

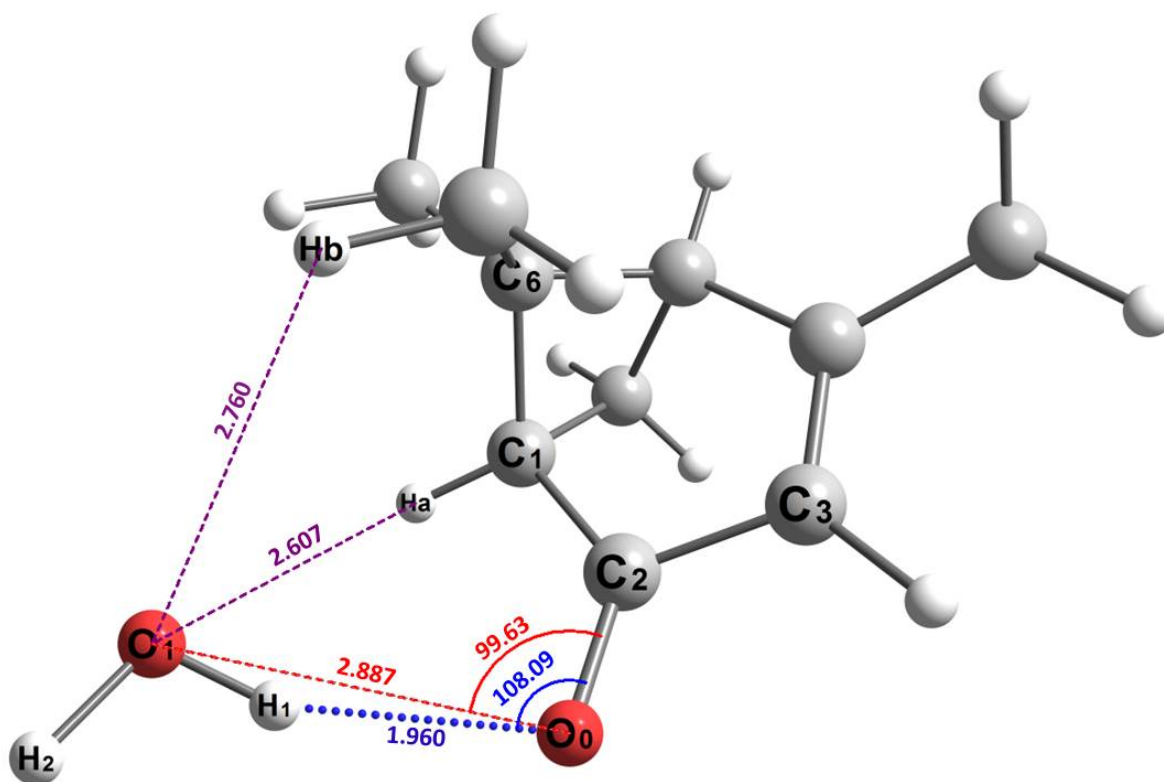

Figure S1: Optimized structure (MP2/6-311++G(d,p)) of the 1w-I complex of verbenone with one water molecule. Distances in Å, angles in °. The purple dashed lines indicate the shortest distances between the water oxygen atom and some hydrogen atoms of verbenone.

Table S1: Experimental rotational and quartic centrifugal distortion constants of the normal and of the  $\text{H}_2^{18}\text{O}$  substituted species of the 1w-I hydrate of verbenone.

|                                    | Normal          | $^{18}\text{O}_1$ |
|------------------------------------|-----------------|-------------------|
| $A/\text{MHz}$                     | 1219.960 64(36) | 1219.124 44(20)   |
| $B/\text{MHz}$                     | 763.384 24(10)  | 734.209 684(43)   |
| $C/\text{MHz}$                     | 608.198 816(63) | 589.681 732(39)   |
| $\Delta_J/\text{kHz}$              | 0.262 09(55)    | 0.265 62(25)      |
| $\Delta_{JK}/\text{kHz}$           | 0.0286(26)      | 0.0145(31)        |
| $\Delta_K/\text{kHz}$              | -0.1345(48)     | $b$               |
| $\delta_J/\text{kHz}$              | 0.024 54(20)    | $b$               |
| $\delta_K/\text{kHz}$              | 0.1004(29)      | $b$               |
| $N_{\text{lines}}^a$               | 67              | 49                |
| $\sigma_{\text{fit}} (\text{kHz})$ | 1.39            | 0.83              |
| $P_a(u.\text{\AA}^2)$              | 539.355 00(6)   | 565.412 464(7)    |
| $P_b(u.\text{\AA}^2)$              | 291.588 72(6)   | 291.624 438(7)    |
| $P_c(u.\text{\AA}^2)$              | 122.669 48(6)   | 122.918 153(7)    |

<sup>a</sup> The number of fitted lines ; <sup>b</sup> Fixed at the value of the normal species.

Table S2: Experimental coordinates (in  $\text{\AA}$ , in the principal axes systems) of the water oxygen atom  $\text{O}_1$  in the 1w-I hydrate of verbenone, along with those obtained by *ab initio* and DFT calculations.

|                                 | $a$         | $b$         | $c$       |
|---------------------------------|-------------|-------------|-----------|
| $r_s/\text{\AA}$                | -3.6258(1)  | -0.1413(18) | 0.3652(7) |
| $r_0/\text{\AA}$                | -3.6249(11) | -0.1846(8)  | 0.3622(4) |
| MP2 <sup>a</sup> / $\text{\AA}$ | -3.492      | -0.214      | 0.411     |
| DFT <sup>b</sup> / $\text{\AA}$ | -3.556      | -0.211      | 0.341     |

<sup>a</sup> MP2 / 6-311++G(d,p) ; <sup>b</sup> B3LYP-D3BJ / def2-TZVP.

Table S3: Effective and quantum chemistry parameters of the verbenone monohydrate 1w-I.

| Parameters <sup>a</sup>                                 | $r_0^b$     | $r_0^c$     | B3LYP <sup>d</sup> | MP2 <sup>e</sup> |
|---------------------------------------------------------|-------------|-------------|--------------------|------------------|
| $r(\text{O}_0\text{O}_1)/\text{\AA}$                    | 3.0148(10)  | 3.0126(12)  | 2.833              | 2.887            |
| $\angle(\text{H}_1\text{O}_1\text{O}_0)/^\circ$         | 29.5(12)    | 34.0(14)    | 11.4               | 13.8             |
| $\angle(\text{O}_1\text{O}_0\text{C}_2)/^\circ$         | 98.963(22)  | 98.988(21)  | 102.5              | 99.6             |
| $\tau(\text{O}_1\text{O}_0\text{C}_2\text{C}_1)/^\circ$ | 145.834(18) | 145.790(16) | 145.0              | 141.6            |
| $\sigma_{\text{fit}}/\text{u\AA}^2$                     | 0.015       | 0.015       | -                  | -                |

<sup>a</sup> The numbering scheme is shown Fig. S1 ; additional parameters involving the H atoms taken from the : <sup>b</sup> MP2/6-311++G(d,p) <sup>c</sup> B3LYP-D3BJ/def2-TZVP geometries ; <sup>d</sup> B3LYP-D3BJ / def2-TZVP ; <sup>e</sup> 6-311++G(d,p).



Table S4: Measured frequencies ( $\nu_{\text{obs.}}$ ) and residuals ( $\nu_{\text{obs.}} - \nu_{\text{calc.}}$ ) in MHz of the monohydrate of verbenone 1w-I.

| $J'$                       | $K'_a$ | $K'_c$ | $\leftarrow$ | $J''$ | $K''_a$ | $K''_c$ | $\nu_{\text{obs.}}$ | $\nu_{\text{obs.}} - \nu_{\text{calc.}}$ | exp. error |
|----------------------------|--------|--------|--------------|-------|---------|---------|---------------------|------------------------------------------|------------|
| ${}^a R_{0,1}$ transitions |        |        |              |       |         |         |                     |                                          |            |
| 3                          | 0      | 3      | $\leftarrow$ | 2     | 0       | 2       | 3990.5570           | -0.0004                                  | 0.001      |
| 3                          | 1      | 3      | $\leftarrow$ | 2     | 1       | 2       | 3862.9660           | 0.0000                                   | 0.001      |
| 3                          | 1      | 2      | $\leftarrow$ | 2     | 1       | 1       | 4323.9257           | 0.0002                                   | 0.001      |
| 4                          | 0      | 4      | $\leftarrow$ | 3     | 0       | 3       | 5217.7312           | 0.0000                                   | 0.001      |
| 4                          | 1      | 4      | $\leftarrow$ | 3     | 1       | 3       | 5120.8510           | -0.0008                                  | 0.001      |
| 4                          | 1      | 3      | $\leftarrow$ | 3     | 1       | 2       | 5714.9227           | -0.0002                                  | 0.001      |
| 4                          | 2      | 3      | $\leftarrow$ | 3     | 2       | 2       | 5460.0764           | 0.0014                                   | 0.001      |
| 4                          | 2      | 2      | $\leftarrow$ | 3     | 2       | 1       | 5728.0881           | 0.0012                                   | 0.001      |
| 5                          | 0      | 5      | $\leftarrow$ | 4     | 0       | 4       | 6420.9223           | -0.0004                                  | 0.001      |
| 5                          | 1      | 5      | $\leftarrow$ | 4     | 1       | 4       | 6363.2179           | 0.0000                                   | 0.001      |
| 5                          | 1      | 4      | $\leftarrow$ | 4     | 1       | 3       | 7052.2727           | 0.0000                                   | 0.001      |
| 5                          | 2      | 4      | $\leftarrow$ | 4     | 2       | 3       | 6784.1007           | 0.0000                                   | 0.001      |
| 5                          | 2      | 3      | $\leftarrow$ | 4     | 2       | 2       | 7216.8687           | 0.0003                                   | 0.001      |
| 5                          | 3      | 3      | $\leftarrow$ | 4     | 3       | 2       | 6932.5543           | -0.0004                                  | 0.001      |
| 5                          | 3      | 2      | $\leftarrow$ | 4     | 3       | 1       | 7019.3449           | -0.0010                                  | 0.001      |
| 6                          | 0      | 6      | $\leftarrow$ | 5     | 0       | 5       | 7623.3072           | -0.0002                                  | 0.001      |
| 6                          | 1      | 6      | $\leftarrow$ | 5     | 1       | 5       | 7594.0392           | 0.0000                                   | 0.001      |
| 6                          | 1      | 5      | $\leftarrow$ | 5     | 1       | 4       | 8322.7758           | 0.0006                                   | 0.001      |
| 6                          | 2      | 5      | $\leftarrow$ | 5     | 2       | 4       | 8084.0698           | -0.0001                                  | 0.001      |
| 6                          | 2      | 4      | $\leftarrow$ | 5     | 2       | 3       | 8672.2974           | 0.0002                                   | 0.001      |
| 6                          | 3      | 4      | $\leftarrow$ | 5     | 3       | 3       | 8314.1635           | -0.0008                                  | 0.001      |
| 6                          | 3      | 3      | $\leftarrow$ | 5     | 3       | 2       | 8515.9670           | 0.0004                                   | 0.001      |
| 6                          | 4      | 3      | $\leftarrow$ | 5     | 4       | 2       | 8337.0848           | 0.0005                                   | 0.004      |
| 6                          | 4      | 2      | $\leftarrow$ | 5     | 4       | 1       | 8354.8165           | -0.0017                                  | 0.002      |
| 7                          | 0      | 7      | $\leftarrow$ | 6     | 0       | 6       | 8831.0439           | -0.0006                                  | 0.001      |
| 7                          | 1      | 7      | $\leftarrow$ | 6     | 1       | 6       | 8817.5947           | 0.0004                                   | 0.001      |
| 7                          | 1      | 6      | $\leftarrow$ | 6     | 1       | 5       | 9536.3199           | 0.0008                                   | 0.001      |
| 7                          | 2      | 6      | $\leftarrow$ | 6     | 2       | 5       | 9360.0192           | -0.0001                                  | 0.001      |
| 7                          | 2      | 5      | $\leftarrow$ | 6     | 2       | 4       | 10074.3617          | 0.0008                                   | 0.001      |

| $J'$                       | $K'_a$ | $K'_c$ | $\leftarrow$ | $J''$ | $K''_a$ | $K''_c$ | $\nu_{\text{obs.}}$ | $\nu_{\text{obs.}} - \nu_{\text{calc.}}$ | exp. error |
|----------------------------|--------|--------|--------------|-------|---------|---------|---------------------|------------------------------------------|------------|
| 7                          | 3      | 5      | $\leftarrow$ | 6     | 3       | 4       | 9678.0555           | 0.0003                                   | 0.001      |
| 7                          | 4      | 4      | $\leftarrow$ | 6     | 4       | 3       | 9746.2294           | -0.0009                                  | 0.001      |
| 7                          | 4      | 3      | $\leftarrow$ | 6     | 4       | 2       | 9801.5056           | -0.0022                                  | 0.001      |
| 8                          | 0      | 8      | $\leftarrow$ | 7     | 0       | 7       | 10 042.9643         | -0.0008                                  | 0.001      |
| 8                          | 1      | 8      | $\leftarrow$ | 7     | 1       | 7       | 10 037.1573         | 0.0003                                   | 0.001      |
| 8                          | 1      | 7      | $\leftarrow$ | 7     | 1       | 6       | 10 724.3391         | 0.0004                                   | 0.001      |
| 8                          | 2      | 7      | $\leftarrow$ | 7     | 2       | 6       | 10 614.9242         | 0.0001                                   | 0.001      |
| 8                          | 3      | 6      | $\leftarrow$ | 7     | 3       | 5       | 11 018.0338         | -0.0001                                  | 0.001      |
| 8                          | 4      | 5      | $\leftarrow$ | 7     | 4       | 4       | 11 152.4909         | -0.0008                                  | 0.001      |
| 8                          | 5      | 4      | $\leftarrow$ | 7     | 5       | 3       | 11 134.7410         | 0.0030                                   | 0.001      |
| 9                          | 0      | 9      | $\leftarrow$ | 8     | 0       | 8       | 11 257.1473         | -0.0002                                  | 0.001      |
| 9                          | 1      | 9      | $\leftarrow$ | 8     | 1       | 8       | 11 254.7437         | 0.0009                                   | 0.001      |
| 9                          | 2      | 7      | $\leftarrow$ | 8     | 2       | 6       | 12 666.0703         | 0.0005                                   | 0.001      |
| 10                         | 0      | 10     | $\leftarrow$ | 9     | 0       | 9       | 12 472.3775         | -0.0053                                  | 0.001      |
| 10                         | 1      | 10     | $\leftarrow$ | 9     | 1       | 9       | 12 471.4211         | 0.0040                                   | 0.001      |
| 10                         | 1      | 9      | $\leftarrow$ | 9     | 1       | 8       | 13 111.2113         | -0.0002                                  | 0.001      |
| 10                         | 2      | 9      | $\leftarrow$ | 9     | 2       | 8       | 13 081.7838         | 0.0003                                   | 0.001      |
| 10                         | 2      | 8      | $\leftarrow$ | 9     | 2       | 7       | 13 864.0008         | -0.0008                                  | 0.001      |
| 10                         | 3      | 8      | $\leftarrow$ | 9     | 3       | 7       | 13 616.6035         | 0.0000                                   | 0.001      |
| 10                         | 4      | 7      | $\leftarrow$ | 9     | 4       | 6       | 13 923.2730         | -0.0003                                  | 0.001      |
| ${}^bR_{-1,1}$ transitions |        |        |              |       |         |         |                     |                                          |            |
| 6                          | 0      | 6      | $\leftarrow$ | 5     | 1       | 5       | 7570.7957           | -0.0006                                  | 0.001      |
| 6                          | 1      | 5      | $\leftarrow$ | 5     | 2       | 4       | 7685.2656           | -0.0003                                  | 0.002      |
| 8                          | 0      | 8      | $\leftarrow$ | 7     | 1       | 7       | 10 033.1718         | -0.0007                                  | 0.001      |
| 8                          | 1      | 7      | $\leftarrow$ | 7     | 2       | 6       | 10 501.8347         | 0.0003                                   | 0.001      |
| 9                          | 0      | 9      | $\leftarrow$ | 8     | 1       | 8       | 11 253.1606         | -0.0025                                  | 0.004      |
| 9                          | 1      | 8      | $\leftarrow$ | 8     | 2       | 7       | 11 800.0594         | 0.0000                                   | 0.002      |
| 10                         | 0      | 10     | $\leftarrow$ | 9     | 1       | 9       | 12 470.8025         | -0.0007                                  | 0.002      |

| $J'$                       | $K'_a$ | $K'_c$ | $\leftarrow$ | $J''$ | $K''_a$ | $K''_c$ | $\nu_{\text{obs.}}$ | $\nu_{\text{obs.}} - \nu_{\text{calc.}}$ | exp. error |
|----------------------------|--------|--------|--------------|-------|---------|---------|---------------------|------------------------------------------|------------|
| ${}^bR_{1,-1}$ transitions |        |        |              |       |         |         |                     |                                          |            |
| 5                          | 3      | 2      | $\leftarrow$ | 4     | 2       | 3       | 9821.6659           | -0.0004                                  | 0.001      |
| 5                          | 5      | 0      | $\leftarrow$ | 4     | 4       | 1       | 11 671.0628         | 0.0022                                   | 0.002      |
| 6                          | 5      | 1      | $\leftarrow$ | 5     | 4       | 2       | 13 054.1982         | -0.0011                                  | 0.002      |
| ${}^bR_{1,1}$ transitions  |        |        |              |       |         |         |                     |                                          |            |
| 5                          | 5      | 1      | $\leftarrow$ | 4     | 4       | 0       | 11 670.4846         | 0.0001                                   | 0.002      |
| 6                          | 1      | 6      | $\leftarrow$ | 5     | 0       | 5       | 7646.5502           | -0.0001                                  | 0.001      |
| 6                          | 5      | 2      | $\leftarrow$ | 5     | 4       | 1       | 13 048.9990         | -0.0009                                  | 0.002      |
| 8                          | 1      | 8      | $\leftarrow$ | 7     | 0       | 7       | 10 046.9509         | 0.0013                                   | 0.001      |
| 8                          | 2      | 7      | $\leftarrow$ | 7     | 1       | 6       | 10 837.4285         | 0.0000                                   | 0.001      |
| 9                          | 1      | 9      | $\leftarrow$ | 8     | 0       | 8       | 11 258.7310         | 0.0037                                   | 0.002      |
| 9                          | 2      | 8      | $\leftarrow$ | 8     | 1       | 7       | 11 966.8270         | -0.0003                                  | 0.001      |
| 10                         | 1      | 10     | $\leftarrow$ | 9     | 0       | 9       | 12 472.9994         | 0.0027                                   | 0.002      |

Table S5: Measured frequencies ( $\nu_{\text{obs.}}$ ) and residuals ( $\nu_{\text{obs.}} - \nu_{\text{calc.}}$ ) in MHz of the monohydrate of verbenone 1w-I labeled with  $^{18}\text{O}$ .

| $J'$                      | $K'_a$ | $K'_c$ | $\leftarrow$ | $J''$ | $K''_a$ | $K''_c$ | $\nu_{\text{obs.}}$ | $\nu_{\text{obs.}} - \nu_{\text{calc.}}$ | exp. error |
|---------------------------|--------|--------|--------------|-------|---------|---------|---------------------|------------------------------------------|------------|
| ${}^aR_{0,1}$ transitions |        |        |              |       |         |         |                     |                                          |            |
| 4                         | 0      | 4      | $\leftarrow$ | 3     | 0       | 3       | 5063.5258           | 0.0001                                   | 0.001      |
| 4                         | 1      | 4      | $\leftarrow$ | 3     | 1       | 3       | 4959.6635           | -0.0002                                  | 0.001      |
| 4                         | 1      | 3      | $\leftarrow$ | 3     | 1       | 2       | 5517.8208           | 0.0001                                   | 0.001      |
| 5                         | 0      | 5      | $\leftarrow$ | 4     | 0       | 4       | 6233.1934           | -0.0003                                  | 0.001      |
| 5                         | 1      | 5      | $\leftarrow$ | 4     | 1       | 4       | 6166.3118           | -0.0007                                  | 0.001      |
| 5                         | 1      | 4      | $\leftarrow$ | 4     | 1       | 3       | 6822.9498           | 0.0008                                   | 0.001      |
| 5                         | 2      | 4      | $\leftarrow$ | 4     | 2       | 3       | 6557.8153           | 0.0007                                   | 0.001      |
| 5                         | 2      | 3      | $\leftarrow$ | 4     | 2       | 2       | 6941.2226           | 0.0011                                   | 0.001      |
| 6                         | 0      | 6      | $\leftarrow$ | 5     | 0       | 5       | 7398.4478           | -0.0009                                  | 0.001      |
| 6                         | 1      | 6      | $\leftarrow$ | 5     | 1       | 5       | 7361.8125           | -0.0005                                  | 0.001      |
| 6                         | 1      | 5      | $\leftarrow$ | 5     | 1       | 4       | 8070.8351           | 0.0028                                   | 0.002      |
| 6                         | 2      | 5      | $\leftarrow$ | 5     | 2       | 4       | 7821.2776           | 0.0001                                   | 0.002      |
| 7                         | 0      | 7      | $\leftarrow$ | 6     | 0       | 6       | 8567.8955           | -0.0004                                  | 0.002      |
| 7                         | 1      | 7      | $\leftarrow$ | 6     | 1       | 6       | 8549.7863           | 0.0000                                   | 0.002      |
| 8                         | 0      | 8      | $\leftarrow$ | 7     | 0       | 7       | 9741.6818           | -0.0008                                  | 0.001      |
| 8                         | 1      | 8      | $\leftarrow$ | 7     | 1       | 7       | 9733.2962           | 0.0000                                   | 0.001      |
| 8                         | 1      | 7      | $\leftarrow$ | 7     | 1       | 6       | 10 421.1854         | -0.0004                                  | 0.001      |
| 8                         | 2      | 7      | $\leftarrow$ | 7     | 2       | 6       | 10 285.8151         | -0.0005                                  | 0.001      |
| 8                         | 2      | 6      | $\leftarrow$ | 7     | 2       | 5       | 11 039.5925         | -0.0002                                  | 0.001      |
| 8                         | 3      | 6      | $\leftarrow$ | 7     | 3       | 5       | 10 645.9884         | 0.0004                                   | 0.001      |
| 8                         | 3      | 5      | $\leftarrow$ | 7     | 3       | 4       | 11 107.6798         | -0.0002                                  | 0.001      |
| 8                         | 4      | 5      | $\leftarrow$ | 7     | 4       | 4       | 10 748.4610         | 0.0004                                   | 0.001      |
| 8                         | 4      | 4      | $\leftarrow$ | 7     | 4       | 3       | 10 843.3815         | 0.0002                                   | 0.001      |
| 9                         | 0      | 9      | $\leftarrow$ | 8     | 0       | 8       | 10 918.1329         | -0.0010                                  | 0.001      |
| 9                         | 1      | 9      | $\leftarrow$ | 8     | 1       | 8       | 10 914.4182         | 0.0013                                   | 0.001      |
| 9                         | 1      | 8      | $\leftarrow$ | 8     | 1       | 7       | 11 572.3379         | -0.0003                                  | 0.001      |
| 9                         | 2      | 8      | $\leftarrow$ | 8     | 2       | 7       | 11 492.1428         | -0.0003                                  | 0.001      |
| 9                         | 2      | 7      | $\leftarrow$ | 8     | 2       | 6       | 12 288.8698         | -0.0006                                  | 0.001      |
| 9                         | 3      | 7      | $\leftarrow$ | 8     | 3       | 6       | 11 926.2501         | 0.0000                                   | 0.001      |
| 9                         | 3      | 6      | $\leftarrow$ | 8     | 3       | 5       | 12 548.6817         | -0.0004                                  | 0.001      |

| $J'$                       | $K'_a$ | $K'_c$ | $\leftarrow$ | $J''$ | $K''_a$ | $K''_c$ | $\nu_{\text{obs.}}$ | $\nu_{\text{obs.}} - \nu_{\text{calc.}}$ | exp. error |
|----------------------------|--------|--------|--------------|-------|---------|---------|---------------------|------------------------------------------|------------|
| 9                          | 4      | 6      | $\leftarrow$ | 8     | 4       | 5       | 12 099.0097         | 0.0005                                   | 0.001      |
| 9                          | 4      | 5      | $\leftarrow$ | 8     | 4       | 4       | 12 297.4518         | -0.0004                                  | 0.001      |
| 10                         | 0      | 10     | $\leftarrow$ | 9     | 0       | 9       | 12 095.9450         | -0.0014                                  | 0.001      |
| 10                         | 1      | 10     | $\leftarrow$ | 9     | 1       | 9       | 12 094.3524         | 0.0024                                   | 0.001      |
| 10                         | 1      | 9      | $\leftarrow$ | 9     | 1       | 8       | 12 729.8642         | 0.0000                                   | 0.002      |
| 10                         | 2      | 9      | $\leftarrow$ | 9     | 2       | 8       | 12 686.8105         | 0.0000                                   | 0.001      |
| 10                         | 3      | 8      | $\leftarrow$ | 9     | 3       | 7       | 13 182.3770         | -0.0007                                  | 0.001      |
| 11                         | 0      | 11     | $\leftarrow$ | 10    | 0       | 10      | 13 274.3797         | -0.0059                                  | 0.005      |
| 11                         | 1      | 11     | $\leftarrow$ | 10    | 1       | 10      | 13 273.7233         | 0.0073                                   | 0.005      |
| ${}^bR_{-1,1}$ transitions |        |        |              |       |         |         |                     |                                          |            |
| 9                          | 0      | 9      | $\leftarrow$ | 8     | 1       | 8       | 10 911.6882         | -0.0009                                  | 0.002      |
| 10                         | 0      | 10     | $\leftarrow$ | 9     | 1       | 9       | 12 093.2145         | -0.0041                                  | 0.005      |
| 10                         | 1      | 9      | $\leftarrow$ | 9     | 2       | 8       | 12 646.3649         | -0.0011                                  | 0.002      |
| ${}^bR_{1,-1}$ transitions |        |        |              |       |         |         |                     |                                          |            |
| 5                          | 5      | 0      | $\leftarrow$ | 4     | 4       | 1       | 11 638.6703         | 0.0018                                   | 0.002      |
| ${}^bR_{1,1}$ transitions  |        |        |              |       |         |         |                     |                                          |            |
| 5                          | 5      | 1      | $\leftarrow$ | 4     | 4       | 0       | 11 638.2892         | -0.0015                                  | 0.002      |
| 8                          | 3      | 6      | $\leftarrow$ | 7     | 2       | 5       | 12 179.8675         | 0.0002                                   | 0.002      |
| 9                          | 1      | 9      | $\leftarrow$ | 8     | 0       | 8       | 10 920.8635         | 0.0018                                   | 0.001      |
| 9                          | 2      | 8      | $\leftarrow$ | 8     | 1       | 7       | 11 655.8373         | 0.0008                                   | 0.002      |
| 10                         | 1      | 10     | $\leftarrow$ | 9     | 0       | 9       | 12 097.0813         | 0.0036                                   | 0.005      |
| 10                         | 2      | 9      | $\leftarrow$ | 9     | 1       | 8       | 12 770.3098         | 0.0010                                   | 0.002      |

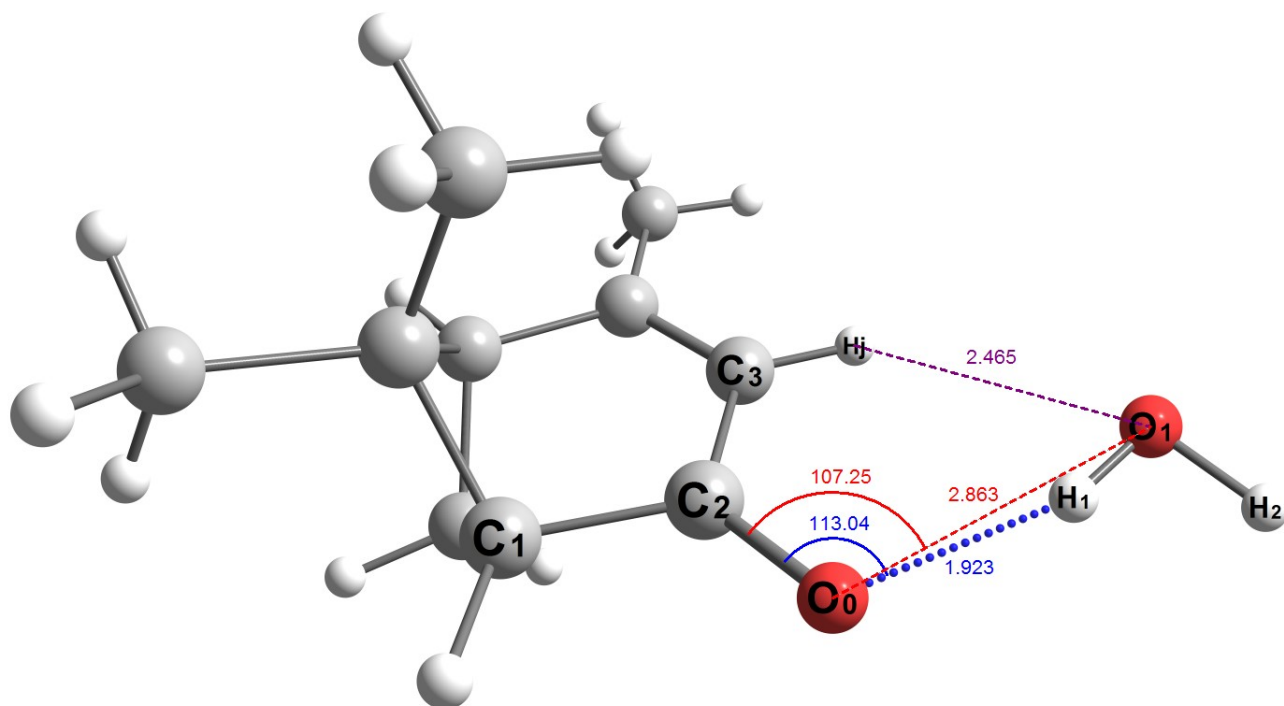

Figure S2: Optimized structure (MP2/6-311++G(d,p)) of the 1w-II complex of verbenone with one water molecule. Distances in Å, angles in °. The purple dashed lines indicate the shortest distances between the water oxygen atom and some hydrogen atoms of verbenone.

Table S6: Experimental rotational and quartic centrifugal distortion constants of the normal and of  $\text{H}_2^{18}\text{O}$  substituted species of the 1w-II hydrate of verbenone.

|                             | Normal          | $^{18}\text{O}_1$ |
|-----------------------------|-----------------|-------------------|
| $A/\text{MHz}$              | 1253.750 46(10) | 1252.784 91(24)   |
| $B/\text{MHz}$              | 666.514 908(72) | 637.345 110(14)   |
| $C/\text{MHz}$              | 554.132 012(38) | 533.944 104 2(80) |
| $\Delta_J/\text{kHz}$       | 0.091 94(40)    | <i>b</i>          |
| $\Delta_{JK}/\text{kHz}$    | 0.0880(26)      | <i>b</i>          |
| $\Delta_K/\text{kHz}$       | -               | -                 |
| $\delta_J/\text{kHz}$       | 0.007 50(21)    | <i>b</i>          |
| $\delta_K/\text{kHz}$       | -0.0693(48)     | <i>b</i>          |
| $N_{\text{lines}}^a$        | 68              | 50                |
| $\sigma_{\text{fit}}$ (kHz) | 0.82            | 0.40              |
| $P_a(u.\text{Å}^2)$         | 633.583 242(7)  | 668.020 647(6)    |
| $P_b(u.\text{Å}^2)$         | 278.435 905(7)  | 278.481 058(6)    |
| $P_c(u.\text{Å}^2)$         | 124.657 870(7)  | 124.923 390(6)    |

<sup>a</sup> The number of fitted lines ; <sup>b</sup> Fixed at the value of the normal species.

Table S7: Experimental coordinates (in Å, in the principal axes systems) of the water oxygen atom O<sub>1</sub> in the 1w-II complex of verbenone, along with those obtained by *ab initio* and DFT calculations.

|                      | <i>a</i>   | <i>b</i>   | <i>c</i>    |
|----------------------|------------|------------|-------------|
| $r_s / \text{Å}$     | 4.1684(4)  | 0.1580(95) | -0.3784(40) |
| $r_0 / \text{Å}$     | 4.1662(21) | 0.1719(5)  | -0.4154(6)  |
| MP2 <sup>a</sup> / Å | 4.111      | 0.171      | -0.436      |
| DFT <sup>b</sup> / Å | 4.111      | 0.186      | -0.419      |

<sup>a</sup> MP2 / 6-311++G(d,p); <sup>b</sup> B3LYP-D3BJ / def2-TZVP.

Table S8: Effective and quantum chemistry parameters of verbenone monohydrate 1w-II.

| Parameters <sup>a</sup>                                   | $r_0^b$     | B3LYP <sup>c</sup> | MP2 <sup>d</sup> |
|-----------------------------------------------------------|-------------|--------------------|------------------|
| $r(\text{O}_0\text{O}_1) / \text{Å}$                      | 2.8646(18)  | 2.827              | 2.863            |
| $\angle(\text{O}_1\text{O}_0\text{C}_2) / ^\circ$         | 109.736(67) | 108.1              | 107.2            |
| $\angle(\text{H}_1\text{O}_1\text{O}_0) / ^\circ$         | 19.9(21)    | 9.2                | 11.6             |
| $\tau(\text{O}_1\text{O}_0\text{C}_2\text{C}_1) / ^\circ$ | 2.578(31)   | 1.95               | 3.52             |
| $\sigma_{\text{fit}} / \text{uÅ}^2$                       | 0.036       | -                  | -                |

<sup>a</sup> the numbering scheme is shown Fig. S2. <sup>b</sup> additional parameters involving the H atoms taken from the MP2/6-311++G(d,p) optimized geometry; <sup>c</sup> B3LYP-D3BJ / def2-TZVP; <sup>d</sup> 6-311++G(d,p).

Table S9: Measured frequencies ( $\nu_{\text{obs.}}$ ) and residuals ( $\nu_{\text{obs.}} - \nu_{\text{calc.}}$ ) in MHz of the monohydrate of verbenone 1w-II.

| $J'$                       | $K'_a$ | $K'_c$ | $\leftarrow$ | $J''$ | $K''_a$ | $K''_c$ | $\nu_{\text{obs.}}$ | $\nu_{\text{obs.}} - \nu_{\text{calc.}}$ | exp. error |
|----------------------------|--------|--------|--------------|-------|---------|---------|---------------------|------------------------------------------|------------|
| ${}^a R_{0,1}$ transitions |        |        |              |       |         |         |                     |                                          |            |
| 3                          | 0      | 3      | $\leftarrow$ | 2     | 0       | 2       | 3604.9514           | -0.0013                                  | 0.001      |
| 3                          | 1      | 3      | $\leftarrow$ | 2     | 1       | 2       | 3484.7342           | 0.0000                                   | 0.001      |
| 3                          | 1      | 2      | $\leftarrow$ | 2     | 1       | 1       | 3820.6778           | -0.0002                                  | 0.001      |
| 4                          | 0      | 4      | $\leftarrow$ | 3     | 0       | 3       | 4749.0332           | -0.0004                                  | 0.001      |
| 4                          | 1      | 3      | $\leftarrow$ | 3     | 1       | 2       | 5074.1769           | 0.0012                                   | 0.001      |
| 4                          | 2      | 2      | $\leftarrow$ | 3     | 2       | 1       | 5004.5763           | 0.0003                                   | 0.002      |
| 5                          | 0      | 5      | $\leftarrow$ | 4     | 0       | 4       | 5864.2267           | 0.0000                                   | 0.001      |
| 5                          | 1      | 5      | $\leftarrow$ | 4     | 1       | 4       | 5769.4600           | -0.0003                                  | 0.001      |
| 5                          | 1      | 4      | $\leftarrow$ | 4     | 1       | 3       | 6306.9710           | -0.0002                                  | 0.001      |
| 5                          | 2      | 4      | $\leftarrow$ | 4     | 2       | 3       | 6070.7020           | 0.0004                                   | 0.001      |
| 5                          | 2      | 3      | $\leftarrow$ | 4     | 2       | 2       | 6309.0124           | 0.0001                                   | 0.001      |
| 6                          | 0      | 6      | $\leftarrow$ | 5     | 0       | 5       | 6964.3032           | 0.0002                                   | 0.001      |
| 6                          | 1      | 6      | $\leftarrow$ | 5     | 1       | 5       | 6898.4305           | -0.0002                                  | 0.001      |
| 6                          | 1      | 5      | $\leftarrow$ | 5     | 1       | 4       | 7510.5829           | 0.0002                                   | 0.001      |
| 6                          | 2      | 5      | $\leftarrow$ | 5     | 2       | 4       | 7258.6946           | -0.0003                                  | 0.001      |
| 6                          | 2      | 4      | $\leftarrow$ | 5     | 2       | 3       | 7615.3011           | -0.0004                                  | 0.001      |
| 6                          | 3      | 4      | $\leftarrow$ | 5     | 3       | 3       | 7375.1529           | 0.0010                                   | 0.001      |
| 6                          | 3      | 3      | $\leftarrow$ | 5     | 3       | 2       | 7437.2357           | -0.0001                                  | 0.001      |
| 7                          | 0      | 7      | $\leftarrow$ | 6     | 0       | 6       | 8061.2516           | 0.0001                                   | 0.001      |
| 7                          | 1      | 7      | $\leftarrow$ | 6     | 1       | 6       | 8020.2600           | -0.0002                                  | 0.001      |
| 7                          | 1      | 6      | $\leftarrow$ | 6     | 1       | 5       | 8677.7577           | 0.0000                                   | 0.001      |
| 7                          | 2      | 6      | $\leftarrow$ | 6     | 2       | 5       | 8433.7348           | 0.0001                                   | 0.001      |
| 7                          | 2      | 5      | $\leftarrow$ | 6     | 2       | 4       | 8907.4529           | -0.0002                                  | 0.001      |
| 7                          | 3      | 5      | $\leftarrow$ | 6     | 3       | 4       | 8604.2684           | -0.0001                                  | 0.001      |
| 7                          | 3      | 4      | $\leftarrow$ | 6     | 3       | 3       | 8733.1592           | 0.0000                                   | 0.001      |
| 7                          | 4      | 4      | $\leftarrow$ | 6     | 4       | 3       | 8613.7370           | 0.0042                                   | 0.004      |
| 8                          | 0      | 8      | $\leftarrow$ | 7     | 0       | 7       | 9160.4613           | -0.0002                                  | 0.001      |
| 8                          | 1      | 8      | $\leftarrow$ | 7     | 1       | 7       | 9136.8215           | -0.0002                                  | 0.001      |



| $J'$                        | $K'_a$ | $K'_c$ | $\leftarrow$ | $J''$ | $K''_a$ | $K''_c$ | $\nu_{\text{obs.}}$ | $\nu_{\text{obs.}} - \nu_{\text{calc.}}$ | exp. error |
|-----------------------------|--------|--------|--------------|-------|---------|---------|---------------------|------------------------------------------|------------|
| ${}^a R_{0,1}$ transitions  |        |        |              |       |         |         |                     |                                          |            |
| 8                           | 1      | 7      | $\leftarrow$ | 7     | 1       | 6       | 9807.5060           | 0.0002                                   | 0.001      |
| 8                           | 2      | 7      | $\leftarrow$ | 7     | 2       | 6       | 9595.2950           | 0.0004                                   | 0.001      |
| 8                           | 2      | 6      | $\leftarrow$ | 7     | 2       | 5       | 10174.7709          | 0.0004                                   | 0.001      |
| 8                           | 3      | 6      | $\leftarrow$ | 7     | 3       | 5       | 9825.8690           | -0.0001                                  | 0.001      |
| 8                           | 3      | 5      | $\leftarrow$ | 7     | 3       | 4       | 10053.1402          | -0.0006                                  | 0.001      |
| 8                           | 4      | 5      | $\leftarrow$ | 7     | 4       | 4       | 9857.9085           | 0.0014                                   | 0.001      |
| 8                           | 4      | 4      | $\leftarrow$ | 7     | 4       | 3       | 9882.9346           | 0.0003                                   | 0.001      |
| 9                           | 0      | 9      | $\leftarrow$ | 8     | 0       | 8       | 10262.7824          | -0.0001                                  | 0.001      |
| 9                           | 1      | 9      | $\leftarrow$ | 8     | 1       | 8       | 10249.8385          | 0.0002                                   | 0.001      |
| 9                           | 1      | 8      | $\leftarrow$ | 8     | 1       | 7       | 10908.6953          | 0.0007                                   | 0.001      |
| 9                           | 2      | 8      | $\leftarrow$ | 8     | 2       | 7       | 10743.8528          | -0.0003                                  | 0.001      |
| 9                           | 2      | 7      | $\leftarrow$ | 8     | 2       | 6       | 11409.6440          | 0.0008                                   | 0.002      |
| 9                           | 3      | 7      | $\leftarrow$ | 8     | 3       | 6       | 11036.6881          | -0.0004                                  | 0.001      |
| 9                           | 3      | 6      | $\leftarrow$ | 8     | 3       | 5       | 11385.8028          | 0.0006                                   | 0.002      |
| 9                           | 4      | 6      | $\leftarrow$ | 8     | 4       | 5       | 11103.2043          | 0.0000                                   | 0.001      |
| 9                           | 4      | 5      | $\leftarrow$ | 8     | 4       | 4       | 11160.0821          | 0.0000                                   | 0.001      |
| 9                           | 5      | 4      | $\leftarrow$ | 8     | 5       | 3       | 11084.7974          | -0.0011                                  | 0.001      |
| 10                          | 0      | 10     | $\leftarrow$ | 9     | 0       | 9       | 11367.4795          | -0.0006                                  | 0.001      |
| 10                          | 1      | 10     | $\leftarrow$ | 9     | 1       | 9       | 11360.6467          | 0.0004                                   | 0.001      |
| 10                          | 1      | 9      | $\leftarrow$ | 9     | 1       | 8       | 11996.2316          | 0.0000                                   | 0.001      |
| 10                          | 2      | 9      | $\leftarrow$ | 9     | 2       | 8       | 11880.8367          | 0.0000                                   | 0.001      |
| 11                          | 0      | 11     | $\leftarrow$ | 10    | 0       | 10      | 12473.6717          | -0.0020                                  | 0.001      |
| 11                          | 1      | 11     | $\leftarrow$ | 10    | 1       | 10      | 12470.1623          | 0.0009                                   | 0.001      |
| 12                          | 1      | 12     | $\leftarrow$ | 11    | 1       | 11      | 13578.9564          | 0.0009                                   | 0.001      |
| ${}^b R_{-1,1}$ transitions |        |        |              |       |         |         |                     |                                          |            |
| 6                           | 0      | 6      | $\leftarrow$ | 5     | 1       | 5       | 6807.0410           | -0.0005                                  | 0.001      |
| 7                           | 0      | 7      | $\leftarrow$ | 6     | 1       | 6       | 7969.8617           | -0.0005                                  | 0.001      |
| 8                           | 0      | 8      | $\leftarrow$ | 7     | 1       | 7       | 9110.0627           | -0.0008                                  | 0.001      |
| 8                           | 1      | 7      | $\leftarrow$ | 7     | 2       | 6       | 9139.7781           | -0.0008                                  | 0.004      |
| 9                           | 0      | 9      | $\leftarrow$ | 8     | 1       | 8       | 10236.0233          | -0.0010                                  | 0.001      |
| 9                           | 1      | 8      | $\leftarrow$ | 8     | 2       | 7       | 10453.1775          | -0.0014                                  | 0.002      |

| $J'$                       | $K'_a$ | $K'_c$ | $\leftarrow$ | $J''$ | $K''_a$ | $K''_c$ | $\nu_{\text{obs.}}$ | $\nu_{\text{obs.}} - \nu_{\text{calc.}}$ | exp. error |
|----------------------------|--------|--------|--------------|-------|---------|---------|---------------------|------------------------------------------|------------|
| 10                         | 0      | 10     | $\leftarrow$ | 9     | 1       | 9       | 11 353.6650         | -0.0012                                  | 0.002      |
| ${}^bR_{1,1}$ transitions  |        |        |              |       |         |         |                     |                                          |            |
| 3                          | 3      | 1      | $\leftarrow$ | 2     | 2       | 0       | 6873.0410           | -0.0009                                  | 0.001      |
| 4                          | 4      | 1      | $\leftarrow$ | 3     | 3       | 0       | 9388.1430           | 0.0008                                   | 0.002      |
| 6                          | 1      | 6      | $\leftarrow$ | 5     | 0       | 5       | 7055.6928           | 0.0006                                   | 0.001      |
| 7                          | 1      | 7      | $\leftarrow$ | 6     | 0       | 6       | 8111.6505           | 0.0010                                   | 0.001      |
| 9                          | 1      | 9      | $\leftarrow$ | 8     | 0       | 8       | 10 276.5975         | 0.0010                                   | 0.001      |
| 10                         | 1      | 10     | $\leftarrow$ | 9     | 0       | 9       | 11 374.4618         | 0.0017                                   | 0.002      |
| ${}^bR_{1,-1}$ transitions |        |        |              |       |         |         |                     |                                          |            |
| 3                          | 3      | 0      | $\leftarrow$ | 2     | 2       | 1       | 6888.8871           | 0.0024                                   | 0.001      |
| 4                          | 4      | 0      | $\leftarrow$ | 3     | 3       | 1       | 9389.4211           | -0.0071                                  | 0.002      |
| 5                          | 3      | 2      | $\leftarrow$ | 4     | 2       | 3       | 9438.0574           | 0.0004                                   | 0.002      |

Table S10: Measured frequencies ( $\nu_{\text{obs.}}$ ) and residuals ( $\nu_{\text{obs.}} - \nu_{\text{calc.}}$ ) in MHz of the monohydrate of verbenone 1w-II labeled with  $^{18}\text{O}$ .

| $J'$                    | $K'_a$ | $K'_c$ | $\leftarrow$ | $J''$ | $K''_a$ | $K''_c$ | $\nu_{\text{obs.}}$ | $\nu_{\text{obs.}} - \nu_{\text{calc.}}$ | exp. error |
|-------------------------|--------|--------|--------------|-------|---------|---------|---------------------|------------------------------------------|------------|
| $^aR_{0,1}$ transitions |        |        |              |       |         |         |                     |                                          |            |
| 3                       | 0      | 3      | $\leftarrow$ | 2     | 0       | 2       | 3467.0216           | 0.0008                                   | 0.002      |
| 3                       | 1      | 2      | $\leftarrow$ | 2     | 1       | 1       | 3660.9949           | 0.0000                                   | 0.001      |
| 4                       | 0      | 4      | $\leftarrow$ | 3     | 0       | 3       | 4574.0206           | 0.0003                                   | 0.002      |
| 4                       | 1      | 4      | $\leftarrow$ | 3     | 1       | 3       | 4456.7972           | 0.0000                                   | 0.001      |
| 4                       | 1      | 3      | $\leftarrow$ | 3     | 1       | 2       | 4865.2090           | -0.0007                                  | 0.001      |
| 5                       | 0      | 5      | $\leftarrow$ | 4     | 0       | 4       | 5653.9429           | 0.0001                                   | 0.001      |
| 5                       | 1      | 5      | $\leftarrow$ | 4     | 1       | 4       | 5553.8408           | 0.0001                                   | 0.001      |
| 5                       | 1      | 4      | $\leftarrow$ | 4     | 1       | 3       | 6053.0198           | -0.0007                                  | 0.001      |
| 5                       | 2      | 4      | $\leftarrow$ | 4     | 2       | 3       | 5829.8365           | 0.0013                                   | 0.002      |
| 5                       | 2      | 3      | $\leftarrow$ | 4     | 2       | 2       | 6031.8732           | -0.0001                                  | 0.001      |
| 6                       | 0      | 6      | $\leftarrow$ | 5     | 0       | 5       | 6717.1390           | 0.0000                                   | 0.001      |
| 6                       | 1      | 6      | $\leftarrow$ | 5     | 1       | 5       | 6643.1031           | 0.0000                                   | 0.001      |
| 6                       | 1      | 5      | $\leftarrow$ | 5     | 1       | 4       | 7217.6447           | 0.0000                                   | 0.001      |
| 6                       | 2      | 5      | $\leftarrow$ | 5     | 2       | 4       | 6974.3027           | -0.0008                                  | 0.002      |
| 6                       | 2      | 4      | $\leftarrow$ | 5     | 2       | 3       | 7282.9528           | -0.0003                                  | 0.002      |
| 6                       | 3      | 4      | $\leftarrow$ | 5     | 3       | 3       | 7071.9088           | 0.0005                                   | 0.002      |
| 6                       | 3      | 3      | $\leftarrow$ | 5     | 3       | 2       | 7117.7332           | 0.0003                                   | 0.002      |
| 7                       | 0      | 7      | $\leftarrow$ | 6     | 0       | 6       | 7774.7245           | 0.0004                                   | 0.001      |
| 7                       | 1      | 7      | $\leftarrow$ | 6     | 1       | 6       | 7725.6776           | -0.0004                                  | 0.001      |
| 7                       | 1      | 6      | $\leftarrow$ | 6     | 1       | 5       | 8352.4358           | 0.0000                                   | 0.001      |
| 7                       | 2      | 6      | $\leftarrow$ | 6     | 2       | 5       | 8107.9063           | 0.0011                                   | 0.002      |
| 7                       | 2      | 5      | $\leftarrow$ | 6     | 2       | 4       | 8525.9609           | -0.0003                                  | 0.001      |
| 7                       | 3      | 4      | $\leftarrow$ | 6     | 3       | 3       | 8349.1770           | -0.0004                                  | 0.002      |
| 8                       | 0      | 8      | $\leftarrow$ | 7     | 0       | 7       | 8833.0850           | 0.0000                                   | 0.001      |
| 8                       | 1      | 8      | $\leftarrow$ | 7     | 1       | 7       | 8803.0471           | -0.0002                                  | 0.001      |
| 8                       | 1      | 7      | $\leftarrow$ | 7     | 1       | 6       | 9454.1122           | 0.0000                                   | 0.001      |
| 8                       | 2      | 7      | $\leftarrow$ | 7     | 2       | 6       | 9229.9347           | 0.0000                                   | 0.001      |
| 8                       | 2      | 6      | $\leftarrow$ | 7     | 2       | 5       | 9750.5979           | 0.0006                                   | 0.001      |
| 8                       | 3      | 5      | $\leftarrow$ | 7     | 3       | 4       | 9602.9154           | -0.0002                                  | 0.001      |

| $J'$                       | $K'_a$ | $K'_c$ | $\leftarrow$ | $J''$ | $K''_a$ | $K''_c$ | $\nu_{\text{obs.}}$ | $\nu_{\text{obs.}} - \nu_{\text{calc.}}$ | exp. error |
|----------------------------|--------|--------|--------------|-------|---------|---------|---------------------|------------------------------------------|------------|
| 8                          | 4      | 4      | $\leftarrow$ | 7     | 4       | 3       | 9464.0256           | -0.0006                                  | 0.002      |
| 9                          | 0      | 9      | $\leftarrow$ | 8     | 0       | 8       | 9894.1215           | -0.0002                                  | 0.001      |
| 9                          | 1      | 9      | $\leftarrow$ | 8     | 1       | 8       | 9876.7017           | 0.0004                                   | 0.001      |
| 9                          | 1      | 8      | $\leftarrow$ | 8     | 1       | 7       | 10 526.4508         | 0.0008                                   | 0.001      |
| 9                          | 2      | 8      | $\leftarrow$ | 8     | 2       | 7       | 10 340.4266         | 0.0001                                   | 0.001      |
| 9                          | 2      | 7      | $\leftarrow$ | 8     | 2       | 6       | 10 949.9104         | 0.0005                                   | 0.001      |
| 10                         | 0      | 10     | $\leftarrow$ | 9     | 0       | 9       | 10 957.6143         | -0.0004                                  | 0.001      |
| 10                         | 1      | 10     | $\leftarrow$ | 9     | 1       | 9       | 10 947.8935         | 0.0006                                   | 0.001      |
| 10                         | 1      | 9      | $\leftarrow$ | 9     | 1       | 8       | 11 580.1471         | 0.0002                                   | 0.001      |
| 10                         | 2      | 9      | $\leftarrow$ | 9     | 2       | 8       | 11 440.1870         | -0.0007                                  | 0.001      |
| 10                         | 3      | 8      | $\leftarrow$ | 9     | 3       | 7       | 11 750.9510         | 0.0000                                   | 0.001      |
| 11                         | 0      | 11     | $\leftarrow$ | 10    | 0       | 10      | 12 022.8247         | -0.0001                                  | 0.001      |
| 11                         | 1      | 11     | $\leftarrow$ | 10    | 1       | 10      | 12 017.5502         | 0.0003                                   | 0.001      |
| 12                         | 1      | 12     | $\leftarrow$ | 11    | 1       | 11      | 13 086.2962         | 0.0002                                   | 0.002      |
| 13                         | 1      | 13     | $\leftarrow$ | 12    | 1       | 12      | 14 154.5205         | -0.0003                                  | 0.002      |
| ${}^bR_{1,1}$ transitions  |        |        |              |       |         |         |                     |                                          |            |
| 8                          | 2      | 7      | $\leftarrow$ | 7     | 1       | 6       | 10 028.6371         | -0.0014                                  | 0.002      |
| 9                          | 1      | 9      | $\leftarrow$ | 8     | 0       | 8       | 9914.9056           | 0.0003                                   | 0.001      |
| 10                         | 1      | 10     | $\leftarrow$ | 9     | 0       | 9       | 10 968.6769         | 0.0004                                   | 0.002      |
| ${}^bR_{-1,1}$ transitions |        |        |              |       |         |         |                     |                                          |            |
| 9                          | 0      | 9      | $\leftarrow$ | 8     | 1       | 8       | 9855.9176           | -0.0001                                  | 0.002      |
| 10                         | 0      | 10     | $\leftarrow$ | 9     | 1       | 9       | 10 936.8301         | -0.0011                                  | 0.001      |
| 10                         | 1      | 9      | $\leftarrow$ | 9     | 2       | 8       | 11 191.6442         | 0.0002                                   | 0.002      |

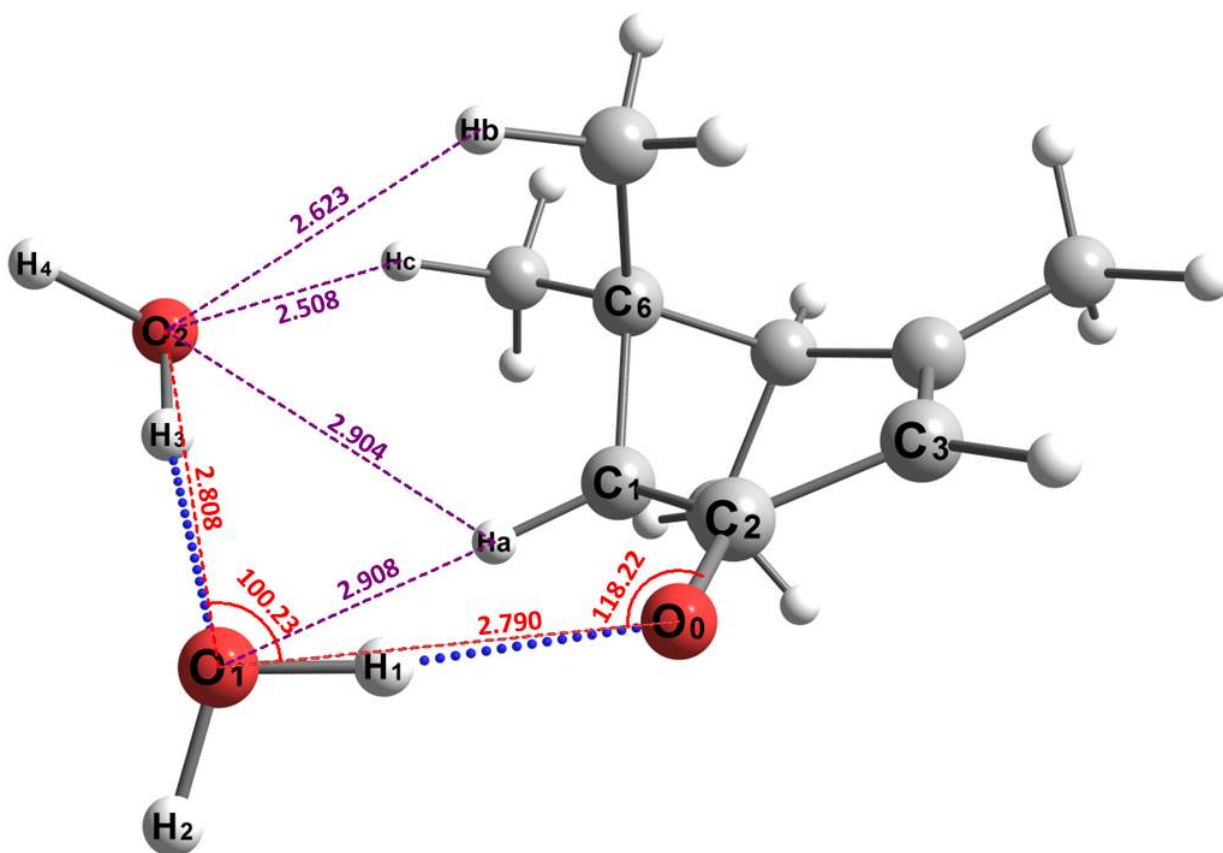

Figure S3: Optimized structure (MP2/6-311++G(d,p)) of the lowest energy conformer 2w-I of the dihydrates of verbenone. Distances in Å, angles in °. The purple dashed lines indicate the shortest distances between the water oxygen atom and some hydrogen atoms of verbenone.

Table S11: Experimental rotational and quartic centrifugal distortion constants of the normal and of the  $\text{H}_2^{18}\text{O}$  substituted species of the dihydrate of verbenone 2w-I.

|                             | Normal          | $^{18}\text{O}_1\text{-}^{18}\text{O}_2$ | $^{18}\text{O}_1\text{-}^{16}\text{O}_2$ | $^{16}\text{O}_1\text{-}^{18}\text{O}_2$ |
|-----------------------------|-----------------|------------------------------------------|------------------------------------------|------------------------------------------|
| $A$ (MHz)                   | 1043.330 07(54) | 1026.164 71(20)                          | 1035.063 66(67)                          | 1035.282 18(52)                          |
| $B$ (MHz)                   | 546.942 431(65) | 521.023 102(47)                          | 532.890 852(28)                          | 533.960 235(23)                          |
| $C$ (MHz)                   | 437.078 352(28) | 417.925 917(48)                          | 426.700 375(22)                          | 427.726 445(19)                          |
| $\Delta_J$ (kHz)            | 0.040 43(33)    | 0.039 65(33)                             | <i>b</i>                                 | <i>b</i>                                 |
| $\Delta_{JK}$ (kHz)         | 0.2593(22)      | 0.2683(34)                               | <i>b</i>                                 | <i>b</i>                                 |
| $\Delta_K$ (kHz)            | -0.202(22)      | <i>b</i>                                 | <i>b</i>                                 | <i>b</i>                                 |
| $\delta_J$ (kHz)            | 0.005 25(16)    | <i>b</i>                                 | <i>b</i>                                 | <i>b</i>                                 |
| $\delta_K$ (kHz)            | 0.1095(32)      | <i>b</i>                                 | <i>b</i>                                 | <i>b</i>                                 |
| $N_{\text{lines}}^a$        | 74              | 50                                       | 30                                       | 25                                       |
| $\sigma_{\text{fit}}$ (kHz) | 0.62            | 0.85                                     | 0.60                                     | 0.43                                     |
| $P_a(u.\text{\AA}^2)$       | 797.9419(2)     | 843.3681(1)                              | 822.2510(2)                              | 819.9323(2)                              |
| $P_b(u.\text{\AA}^2)$       | 358.3245(2)     | 365.8869(1)                              | 362.1374(2)                              | 361.6150(2)                              |
| $P_c(u.\text{\AA}^2)$       | 126.0658(2)     | 126.6062(1)                              | 126.1214(2)                              | 126.5408(2)                              |

<sup>a</sup> The number of fitted lines ; <sup>b</sup> Fixed at the value of the normal species.

Table S12: Experimental coordinates (in Å, in the principal axes systems) of the water oxygen atoms O<sub>1</sub> and O<sub>2</sub> in the 2w-I complex of verbenone, along with those obtained by *ab initio* and DFT calculations.

|                          | <i>a</i>   | <i>b</i>    | <i>c</i>    |
|--------------------------|------------|-------------|-------------|
| O <sub>1</sub>           |            |             |             |
| <i>r<sub>s</sub></i> / Å | −3.4860(4) | −1.4243(11) | −0.1719(87) |
| <i>r<sub>0</sub></i> / Å | −3.501(10) | −1.446(22)  | −0.069(2)   |
| MP2 <sup>a</sup> / Å     | −3.518     | −1.405      | −0.076      |
| DFT <sup>b</sup> / Å     | −3.440     | −1.421      | −0.093      |
| O <sub>2</sub>           |            |             |             |
| <i>r<sub>s</sub></i> / Å | −3.3165(5) | 1.3187(11)  | 0.501(3)    |
| <i>r<sub>0</sub></i> / Å | −3.332(10) | 1.348(15)   | 0.456(3)    |
| MP2 <sup>a</sup> / Å     | −3.274     | 1.336       | 0.480       |
| DFT <sup>b</sup> / Å     | −3.271     | 1.300       | 0.481       |

<sup>a</sup> MP2 / 6-311++G(d,p) ; <sup>b</sup> B3LYP-D3BJ / def2-TZVP ;

Table S13: The substitution and effective structural parameters of the verbenone dihydrate 2w-I compared with those optimized by quantum chemistry.

| Parameters <sup>a</sup>                                             | <i>r<sub>s</sub></i> | <i>r<sub>0</sub></i> <sup>b</sup> | B3LYP <sup>c</sup> | MP2 <sup>d</sup> |
|---------------------------------------------------------------------|----------------------|-----------------------------------|--------------------|------------------|
| <i>r</i> (O <sub>1</sub> O <sub>0</sub> ) / Å                       | -                    | 2.79(13)                          | 2.742              | 2.790            |
| <i>r</i> (O <sub>2</sub> O <sub>1</sub> ) / Å                       | 2.848(36)            | 2.842(28)                         | 2.786              | 2.808            |
| ∠(O <sub>1</sub> O <sub>0</sub> C <sub>2</sub> ) / °                | -                    | 118.3(40)                         | 117.4              | 118.2            |
| ∠(O <sub>2</sub> O <sub>1</sub> O <sub>0</sub> ) / °                | -                    | 101.38(68)                        | 101.6              | 100.3            |
| τ(O <sub>2</sub> O <sub>1</sub> O <sub>0</sub> C <sub>2</sub> ) / ° | -                    | −22.40(60)                        | −25.2              | −23.2            |
| σ <sub>fit</sub> / uÅ <sup>2</sup>                                  | -                    | 0.199                             | -                  | -                |

<sup>a</sup> The numbering scheme is shown Fig. S3; <sup>b</sup> Parameters involving the H atoms taken from the MP2/6-311++G(d,p) optimized geometry ; <sup>c</sup> B3LYP-D3BJ / def2-TZVP ; <sup>d</sup> MP2/6-311++G(d,p).

Table S14: Measured frequencies ( $\nu_{\text{obs.}}$ ) and residuals ( $\nu_{\text{obs.}} - \nu_{\text{calc.}}$ ) in MHz of the dihydrate of verbenone 2w-I.

| $J'$                       | $K'_a$ | $K'_c$ | $\leftarrow$ | $J''$ | $K''_a$ | $K''_c$ | $\nu_{\text{obs.}}$ | $\nu_{\text{obs.}} - \nu_{\text{calc.}}$ | exp. error |
|----------------------------|--------|--------|--------------|-------|---------|---------|---------------------|------------------------------------------|------------|
| ${}^a R_{0,1}$ transitions |        |        |              |       |         |         |                     |                                          |            |
| 3                          | 0      | 3      | $\leftarrow$ | 2     | 0       | 2       | 2889.1083           | 0.0011                                   | 0.001      |
| 3                          | 1      | 3      | $\leftarrow$ | 2     | 1       | 2       | 2777.7332           | 0.0009                                   | 0.001      |
| 4                          | 0      | 4      | $\leftarrow$ | 3     | 0       | 3       | 3790.9144           | 0.0001                                   | 0.001      |
| 4                          | 1      | 4      | $\leftarrow$ | 3     | 1       | 3       | 3687.8382           | -0.0006                                  | 0.001      |
| 4                          | 1      | 3      | $\leftarrow$ | 3     | 1       | 2       | 4118.2373           | -0.0003                                  | 0.002      |
| 5                          | 0      | 5      | $\leftarrow$ | 4     | 0       | 4       | 4666.0191           | 0.0013                                   | 0.001      |
| 5                          | 1      | 5      | $\leftarrow$ | 4     | 1       | 4       | 4588.1778           | 0.0004                                   | 0.001      |
| 5                          | 1      | 4      | $\leftarrow$ | 4     | 1       | 3       | 5106.8041           | -0.0009                                  | 0.001      |
| 5                          | 2      | 4      | $\leftarrow$ | 4     | 2       | 3       | 4883.9257           | 0.0010                                   | 0.001      |
| 5                          | 2      | 3      | $\leftarrow$ | 4     | 2       | 2       | 5137.0456           | -0.0011                                  | 0.002      |
| 5                          | 3      | 2      | $\leftarrow$ | 4     | 3       | 1       | 4992.5562           | -0.0009                                  | 0.001      |
| 6                          | 0      | 6      | $\leftarrow$ | 5     | 0       | 5       | 5530.1203           | 0.0004                                   | 0.001      |
| 6                          | 1      | 6      | $\leftarrow$ | 5     | 1       | 5       | 5479.8724           | 0.0001                                   | 0.001      |
| 6                          | 1      | 5      | $\leftarrow$ | 5     | 1       | 4       | 6062.0603           | -0.0004                                  | 0.001      |
| 6                          | 2      | 5      | $\leftarrow$ | 5     | 2       | 4       | 5831.8456           | 0.0004                                   | 0.001      |
| 6                          | 2      | 4      | $\leftarrow$ | 5     | 2       | 3       | 6201.6407           | 0.0002                                   | 0.001      |
| 6                          | 3      | 4      | $\leftarrow$ | 5     | 3       | 3       | 5957.5633           | 0.0008                                   | 0.001      |
| 6                          | 3      | 3      | $\leftarrow$ | 5     | 3       | 2       | 6034.4639           | 0.0002                                   | 0.001      |
| 7                          | 0      | 7      | $\leftarrow$ | 6     | 0       | 6       | 6393.9444           | 0.0001                                   | 0.001      |
| 7                          | 1      | 7      | $\leftarrow$ | 6     | 1       | 6       | 6364.8726           | 0.0007                                   | 0.001      |
| 7                          | 1      | 6      | $\leftarrow$ | 6     | 1       | 5       | 6977.8440           | 0.0001                                   | 0.001      |
| 7                          | 2      | 6      | $\leftarrow$ | 6     | 2       | 5       | 6765.8623           | 0.0001                                   | 0.001      |
| 7                          | 2      | 5      | $\leftarrow$ | 6     | 2       | 4       | 7246.4904           | 0.0000                                   | 0.001      |
| 7                          | 3      | 5      | $\leftarrow$ | 6     | 3       | 4       | 6947.6578           | 0.0004                                   | 0.001      |
| 7                          | 3      | 4      | $\leftarrow$ | 6     | 3       | 3       | 7103.2635           | -0.0014                                  | 0.001      |
| 8                          | 0      | 8      | $\leftarrow$ | 7     | 0       | 7       | 7260.8910           | -0.0007                                  | 0.001      |
| 8                          | 1      | 8      | $\leftarrow$ | 7     | 1       | 7       | 7245.2500           | -0.0004                                  | 0.001      |
| 8                          | 1      | 7      | $\leftarrow$ | 7     | 1       | 6       | 7857.7106           | 0.0005                                   | 0.001      |



| $J'$ | $K'_a$ | $K'_c$ | $\leftarrow$ | $J''$ | $K''_a$ | $K''_c$ | $\nu_{\text{obs.}}$ | $\nu_{\text{obs.}} - \nu_{\text{calc.}}$ | exp. error |
|------|--------|--------|--------------|-------|---------|---------|---------------------|------------------------------------------|------------|
| 8    | 2      | 7      | $\leftarrow$ | 7     | 2       | 6       | 7685.8646           | 0.0000                                   | 0.001      |
| 8    | 2      | 6      | $\leftarrow$ | 7     | 2       | 5       | 8261.5757           | 0.0001                                   | 0.001      |
| 8    | 3      | 6      | $\leftarrow$ | 7     | 3       | 5       | 7928.2305           | 0.0001                                   | 0.001      |
| 8    | 3      | 5      | $\leftarrow$ | 7     | 3       | 4       | 8192.8852           | 0.0000                                   | 0.001      |
| 8    | 4      | 5      | $\leftarrow$ | 7     | 4       | 4       | 7972.5935           | 0.0009                                   | 0.001      |
| 8    | 4      | 4      | $\leftarrow$ | 7     | 4       | 3       | 8008.0302           | -0.0007                                  | 0.001      |
| 8    | 5      | 3      | $\leftarrow$ | 7     | 5       | 2       | 7953.7472           | -0.0005                                  | 0.002      |
| 9    | 0      | 9      | $\leftarrow$ | 8     | 0       | 8       | 8130.7495           | -0.0005                                  | 0.001      |
| 9    | 1      | 9      | $\leftarrow$ | 8     | 1       | 8       | 8122.7370           | 0.0000                                   | 0.001      |
| 9    | 1      | 8      | $\leftarrow$ | 8     | 1       | 7       | 8715.8410           | -0.0002                                  | 0.001      |
| 9    | 2      | 8      | $\leftarrow$ | 8     | 2       | 7       | 8592.9433           | 0.0002                                   | 0.001      |
| 9    | 2      | 7      | $\leftarrow$ | 8     | 2       | 6       | 9239.0745           | 0.0003                                   | 0.002      |
| 9    | 3      | 7      | $\leftarrow$ | 8     | 3       | 6       | 8896.0066           | 0.0002                                   | 0.002      |
| 9    | 3      | 6      | $\leftarrow$ | 8     | 3       | 5       | 9286.0363           | 0.0000                                   | 0.002      |
| 9    | 4      | 6      | $\leftarrow$ | 8     | 4       | 5       | 8980.7236           | 0.0001                                   | 0.002      |
| 9    | 4      | 5      | $\leftarrow$ | 8     | 4       | 4       | 9059.7170           | 0.0006                                   | 0.002      |
| 10   | 0      | 10     | $\leftarrow$ | 9     | 0       | 9       | 9002.5187           | -0.0012                                  | 0.002      |
| 10   | 1      | 10     | $\leftarrow$ | 9     | 1       | 9       | 8998.5541           | -0.0002                                  | 0.002      |
| 10   | 1      | 9      | $\leftarrow$ | 9     | 1       | 8       | 9568.1799           | 0.0000                                   | 0.002      |
| 10   | 2      | 9      | $\leftarrow$ | 9     | 2       | 8       | 9489.1625           | -0.0003                                  | 0.002      |
| 11   | 0      | 11     | $\leftarrow$ | 10    | 0       | 10      | 9875.3803           | -0.0018                                  | 0.002      |
| 11   | 1      | 11     | $\leftarrow$ | 10    | 1       | 10      | 9873.4688           | -0.0004                                  | 0.002      |
| 11   | 1      | 10     | $\leftarrow$ | 10    | 1       | 9       | 10 423.9361         | -0.0004                                  | 0.001      |
| 11   | 2      | 10     | $\leftarrow$ | 10    | 2       | 9       | 10 377.0745         | -0.0005                                  | 0.001      |
| 11   | 3      | 9      | $\leftarrow$ | 10    | 3       | 8       | 10 785.6422         | 0.0003                                   | 0.001      |
| 12   | 0      | 12     | $\leftarrow$ | 11    | 0       | 11      | 10 748.8235         | -0.0026                                  | 0.002      |
| 12   | 1      | 12     | $\leftarrow$ | 11    | 1       | 11      | 10 747.9223         | 0.0008                                   | 0.001      |
| 13   | 0      | 13     | $\leftarrow$ | 12    | 0       | 12      | 11 622.5643         | -0.0031                                  | 0.002      |
| 13   | 1      | 13     | $\leftarrow$ | 12    | 1       | 12      | 11 622.1458         | -0.0005                                  | 0.001      |

| $J'$                       | $K'_a$ | $K'_c$ | $\leftarrow$ | $J''$ | $K''_a$ | $K''_c$ | $\nu_{\text{obs.}}$ | $\nu_{\text{obs.}} - \nu_{\text{calc.}}$ | exp. error |
|----------------------------|--------|--------|--------------|-------|---------|---------|---------------------|------------------------------------------|------------|
| 14                         | 1      | 14     | $\leftarrow$ | 13    | 1       | 13      | 12496.2647          | 0.0018                                   | 0.001      |
| ${}^bR_{-1,1}$ transitions |        |        |              |       |         |         |                     |                                          |            |
| 6                          | 0      | 6      | $\leftarrow$ | 5     | 1       | 5       | 5419.5887           | 0.0002                                   | 0.001      |
| 7                          | 0      | 7      | $\leftarrow$ | 6     | 1       | 6       | 6333.6604           | 0.0000                                   | 0.001      |
| 8                          | 0      | 8      | $\leftarrow$ | 7     | 1       | 7       | 7229.6800           | -0.0003                                  | 0.001      |
| 8                          | 1      | 7      | $\leftarrow$ | 7     | 2       | 6       | 7382.2827           | -0.0001                                  | 0.002      |
| 9                          | 0      | 9      | $\leftarrow$ | 8     | 1       | 8       | 8115.1793           | -0.0005                                  | 0.002      |
| 9                          | 1      | 8      | $\leftarrow$ | 8     | 2       | 7       | 8412.2604           | 0.0008                                   | 0.002      |
| 11                         | 0      | 11     | $\leftarrow$ | 10    | 1       | 10      | 9871.7888           | -0.0017                                  | 0.002      |
| 11                         | 1      | 10     | $\leftarrow$ | 10    | 2       | 9       | 10322.2700          | -0.0001                                  | 0.002      |
| 12                         | 0      | 12     | $\leftarrow$ | 11    | 1       | 11      | 10747.1469          | -0.0006                                  | 0.002      |
| ${}^bR_{1,1}$ transitions  |        |        |              |       |         |         |                     |                                          |            |
| 4                          | 4      | 1      | $\leftarrow$ | 3     | 3       | 0       | 7796.9756           | 0.0001                                   | 0.002      |
| 6                          | 1      | 6      | $\leftarrow$ | 5     | 0       | 5       | 5590.4036           | 0.0000                                   | 0.001      |
| 7                          | 1      | 7      | $\leftarrow$ | 6     | 0       | 6       | 6425.1555           | -0.0001                                  | 0.001      |
| 8                          | 1      | 8      | $\leftarrow$ | 7     | 0       | 7       | 7276.4614           | -0.0004                                  | 0.001      |
| 9                          | 1      | 9      | $\leftarrow$ | 8     | 0       | 8       | 8138.3079           | 0.0007                                   | 0.002      |
| 11                         | 1      | 11     | $\leftarrow$ | 10    | 0       | 10      | 9877.0627           | 0.0019                                   | 0.002      |
| ${}^bR_{1,-1}$ transitions |        |        |              |       |         |         |                     |                                          |            |
| 4                          | 4      | 0      | $\leftarrow$ | 3     | 3       | 1       | 7798.6256           | -0.0004                                  | 0.002      |

Table S15: Measured frequencies ( $\nu_{\text{obs.}}$ ) and residuals ( $\nu_{\text{obs.}} - \nu_{\text{calc.}}$ ) in MHz of the dihydrate of verbenone 2w-I with the  $^{16}\text{O}_1$  atom substituted by a  $^{18}\text{O}$  atom.

| $J'$                    | $K'_a$ | $K'_c$ | $\leftarrow$ | $J''$ | $K''_a$ | $K''_c$ | $\nu_{\text{obs.}}$ | $\nu_{\text{obs.}} - \nu_{\text{calc.}}$ | exp. error |
|-------------------------|--------|--------|--------------|-------|---------|---------|---------------------|------------------------------------------|------------|
| $^aR_{0,1}$ transitions |        |        |              |       |         |         |                     |                                          |            |
| 4                       | 0      | 4      | $\leftarrow$ | 3     | 0       | 3       | 3702.5449           | -0.0009                                  | 0.001      |
| 4                       | 1      | 4      | $\leftarrow$ | 3     | 1       | 3       | 3599.3804           | -0.0003                                  | 0.002      |
| 4                       | 1      | 3      | $\leftarrow$ | 3     | 1       | 2       | 4016.0675           | -0.0009                                  | 0.001      |
| 5                       | 0      | 5      | $\leftarrow$ | 4     | 0       | 4       | 4558.5207           | -0.0010                                  | 0.002      |
| 5                       | 1      | 5      | $\leftarrow$ | 4     | 1       | 4       | 4478.8764           | -0.0005                                  | 0.001      |
| 5                       | 1      | 4      | $\leftarrow$ | 4     | 1       | 3       | 4982.3962           | -0.0002                                  | 0.001      |
| 5                       | 2      | 4      | $\leftarrow$ | 4     | 2       | 3       | 4764.3693           | -0.0005                                  | 0.002      |
| 5                       | 2      | 3      | $\leftarrow$ | 4     | 2       | 2       | 5002.9758           | -0.0013                                  | 0.001      |
| 6                       | 0      | 6      | $\leftarrow$ | 5     | 0       | 5       | 5402.6921           | -0.0005                                  | 0.001      |
| 6                       | 1      | 6      | $\leftarrow$ | 5     | 1       | 5       | 5350.0467           | -0.0005                                  | 0.001      |
| 6                       | 1      | 5      | $\leftarrow$ | 5     | 1       | 4       | 5918.0182           | 0.0008                                   | 0.001      |
| 6                       | 2      | 5      | $\leftarrow$ | 5     | 2       | 4       | 5690.3799           | -0.0009                                  | 0.001      |
| 6                       | 2      | 4      | $\leftarrow$ | 5     | 2       | 3       | 6041.6269           | -0.0002                                  | 0.001      |
| 7                       | 0      | 7      | $\leftarrow$ | 6     | 0       | 6       | 6245.8187           | -0.0002                                  | 0.001      |
| 7                       | 1      | 7      | $\leftarrow$ | 6     | 1       | 6       | 6214.6463           | 0.0001                                   | 0.001      |
| 7                       | 1      | 6      | $\leftarrow$ | 6     | 1       | 5       | 6816.5596           | -0.0002                                  | 0.001      |
| 7                       | 2      | 6      | $\leftarrow$ | 6     | 2       | 5       | 6603.3282           | -0.0002                                  | 0.001      |
| 7                       | 2      | 5      | $\leftarrow$ | 6     | 2       | 4       | 7062.9937           | 0.0004                                   | 0.001      |
| 7                       | 3      | 4      | $\leftarrow$ | 6     | 3       | 3       | 6915.4851           | 0.0001                                   | 0.001      |
| 8                       | 0      | 8      | $\leftarrow$ | 7     | 0       | 7       | 7091.7565           | 0.0002                                   | 0.001      |
| 8                       | 1      | 8      | $\leftarrow$ | 7     | 1       | 7       | 7074.6115           | 0.0001                                   | 0.001      |
| 8                       | 1      | 7      | $\leftarrow$ | 7     | 1       | 6       | 7679.8995           | 0.0001                                   | 0.001      |
| 8                       | 2      | 7      | $\leftarrow$ | 7     | 2       | 6       | 7502.9668           | 0.0003                                   | 0.001      |
| 8                       | 2      | 6      | $\leftarrow$ | 7     | 2       | 5       | 8057.2882           | 0.0012                                   | 0.002      |
| 8                       | 3      | 5      | $\leftarrow$ | 7     | 3       | 4       | 7974.9090           | 0.0024                                   | 0.002      |
| 9                       | 0      | 9      | $\leftarrow$ | 8     | 0       | 8       | 7940.5801           | 0.0001                                   | 0.001      |
| 9                       | 1      | 9      | $\leftarrow$ | 8     | 1       | 8       | 7931.6096           | 0.0007                                   | 0.001      |
| 9                       | 1      | 8      | $\leftarrow$ | 8     | 1       | 7       | 8520.1210           | 0.0025                                   | 0.005      |
| 9                       | 2      | 8      | $\leftarrow$ | 8     | 2       | 7       | 8390.1461           | 0.0010                                   | 0.002      |
| 9                       | 3      | 7      | $\leftarrow$ | 8     | 3       | 6       | 8678.1816           | 0.0017                                   | 0.002      |

Table S16: Measured frequencies ( $\nu_{\text{obs.}}$ ) and residuals ( $\nu_{\text{obs.}} - \nu_{\text{calc.}}$ ) in MHz of the dihydrate of verbenone 2w-I with the  $^{16}\text{O}_2$  atom substituted by a  $^{18}\text{O}$  atom.

| $J'$                     | $K'_a$ | $K'_c$ | $\leftarrow$ | $J''$ | $K''_a$ | $K''_c$ | $\nu_{\text{obs.}}$ | $\nu_{\text{obs.}} - \nu_{\text{calc.}}$ | exp. error |
|--------------------------|--------|--------|--------------|-------|---------|---------|---------------------|------------------------------------------|------------|
| $^a R_{0,1}$ transitions |        |        |              |       |         |         |                     |                                          |            |
| 5                        | 1      | 5      | $\leftarrow$ | 4     | 1       | 4       | 4489.1463           | 0.0023                                   | 0.002      |
| 5                        | 1      | 4      | $\leftarrow$ | 4     | 1       | 3       | 4992.7692           | 0.0000                                   | 0.001      |
| 5                        | 2      | 3      | $\leftarrow$ | 4     | 2       | 2       | 5013.7555           | -0.0004                                  | 0.001      |
| 6                        | 0      | 6      | $\leftarrow$ | 5     | 0       | 5       | 5414.8099           | -0.0002                                  | 0.001      |
| 6                        | 1      | 6      | $\leftarrow$ | 5     | 1       | 5       | 5362.3365           | 0.0007                                   | 0.001      |
| 6                        | 1      | 5      | $\leftarrow$ | 5     | 1       | 4       | 5930.3025           | 0.0005                                   | 0.001      |
| 6                        | 2      | 5      | $\leftarrow$ | 5     | 2       | 4       | 5702.8039           | 0.0003                                   | 0.001      |
| 6                        | 2      | 4      | $\leftarrow$ | 5     | 2       | 3       | 6054.4834           | 0.0000                                   | 0.001      |
| 7                        | 0      | 7      | $\leftarrow$ | 6     | 0       | 6       | 6259.9958           | -0.0004                                  | 0.001      |
| 7                        | 1      | 7      | $\leftarrow$ | 6     | 1       | 6       | 6228.9578           | 0.0000                                   | 0.001      |
| 7                        | 1      | 6      | $\leftarrow$ | 6     | 1       | 5       | 6830.6899           | 0.0006                                   | 0.001      |
| 7                        | 2      | 6      | $\leftarrow$ | 6     | 2       | 5       | 6617.7505           | 0.0000                                   | 0.001      |
| 7                        | 2      | 5      | $\leftarrow$ | 6     | 2       | 4       | 7077.8373           | 0.0001                                   | 0.001      |
| 7                        | 3      | 4      | $\leftarrow$ | 6     | 3       | 3       | 6930.6705           | -0.0004                                  | 0.002      |
| 8                        | 0      | 8      | $\leftarrow$ | 7     | 0       | 7       | 7108.0055           | 0.0000                                   | 0.001      |
| 8                        | 1      | 8      | $\leftarrow$ | 7     | 1       | 7       | 7090.9518           | 0.0001                                   | 0.001      |
| 8                        | 1      | 7      | $\leftarrow$ | 7     | 1       | 6       | 7695.8755           | -0.0002                                  | 0.001      |
| 8                        | 2      | 7      | $\leftarrow$ | 7     | 2       | 6       | 7519.3706           | -0.0001                                  | 0.001      |
| 8                        | 2      | 6      | $\leftarrow$ | 7     | 2       | 5       | 8074.0296           | -0.0001                                  | 0.002      |
| 8                        | 3      | 5      | $\leftarrow$ | 7     | 3       | 4       | 7992.3391           | -0.0001                                  | 0.002      |
| 9                        | 0      | 9      | $\leftarrow$ | 8     | 0       | 8       | 7958.8991           | -0.0003                                  | 0.002      |
| 9                        | 1      | 9      | $\leftarrow$ | 8     | 1       | 8       | 7949.9845           | -0.0002                                  | 0.002      |
| 9                        | 1      | 8      | $\leftarrow$ | 8     | 1       | 7       | 8538.0238           | -0.0016                                  | 0.002      |
| 9                        | 2      | 8      | $\leftarrow$ | 8     | 2       | 7       | 8408.5230           | -0.0015                                  | 0.002      |

Table S17: Measured frequencies ( $\nu_{\text{obs.}}$ ) and residuals ( $\nu_{\text{obs.}} - \nu_{\text{calc.}}$ ) in MHz of the dihydrate of verbenone 2w-I with the  $^{16}\text{O}_1$  and  $^{16}\text{O}_2$  atoms substituted by  $^{18}\text{O}$  atoms.

| $J'$                       | $K'_a$ | $K'_c$ | $\leftarrow$ | $J''$ | $K''_a$ | $K''_c$ | $\nu_{\text{obs.}}$ | $\nu_{\text{obs.}} - \nu_{\text{calc.}}$ | exp. error |
|----------------------------|--------|--------|--------------|-------|---------|---------|---------------------|------------------------------------------|------------|
| ${}^a R_{0,1}$ transitions |        |        |              |       |         |         |                     |                                          |            |
| 4                          | 0      | 4      | $\leftarrow$ | 3     | 0       | 3       | 3627.2897           | -0.0012                                  | 0.001      |
| 4                          | 1      | 4      | $\leftarrow$ | 3     | 1       | 3       | 3524.4825           | 0.0004                                   | 0.001      |
| 4                          | 1      | 3      | $\leftarrow$ | 3     | 1       | 2       | 3929.5120           | 0.0000                                   | 0.001      |
| 4                          | 2      | 3      | $\leftarrow$ | 3     | 2       | 2       | 3744.6661           | 0.0068                                   | 0.005      |
| 5                          | 0      | 5      | $\leftarrow$ | 4     | 0       | 4       | 4466.9648           | -0.0007                                  | 0.001      |
| 5                          | 1      | 5      | $\leftarrow$ | 4     | 1       | 4       | 4386.2602           | -0.0005                                  | 0.002      |
| 5                          | 1      | 4      | $\leftarrow$ | 4     | 1       | 3       | 4876.6969           | -0.0004                                  | 0.001      |
| 5                          | 2      | 4      | $\leftarrow$ | 4     | 2       | 3       | 4663.1503           | 0.0006                                   | 0.001      |
| 5                          | 2      | 3      | $\leftarrow$ | 4     | 2       | 2       | 4890.1987           | 0.0009                                   | 0.001      |
| 6                          | 0      | 6      | $\leftarrow$ | 5     | 0       | 5       | 5294.3080           | -0.0006                                  | 0.002      |
| 6                          | 1      | 6      | $\leftarrow$ | 5     | 1       | 5       | 5239.9870           | 0.0000                                   | 0.002      |
| 6                          | 1      | 5      | $\leftarrow$ | 5     | 1       | 4       | 5795.1727           | -0.0004                                  | 0.002      |
| 6                          | 2      | 5      | $\leftarrow$ | 5     | 2       | 4       | 5570.4637           | 0.0006                                   | 0.001      |
| 6                          | 2      | 4      | $\leftarrow$ | 5     | 2       | 3       | 5906.6563           | -0.0026                                  | 0.002      |
| 7                          | 0      | 7      | $\leftarrow$ | 6     | 0       | 6       | 6120.0095           | -0.0007                                  | 0.002      |
| 7                          | 1      | 7      | $\leftarrow$ | 6     | 1       | 6       | 6087.2667           | -0.0004                                  | 0.001      |
| 7                          | 1      | 6      | $\leftarrow$ | 6     | 1       | 5       | 6678.5281           | 0.0005                                   | 0.001      |
| 7                          | 2      | 6      | $\leftarrow$ | 6     | 2       | 5       | 6465.3801           | 0.0009                                   | 0.001      |
| 7                          | 2      | 5      | $\leftarrow$ | 6     | 2       | 4       | 6907.6975           | -0.0004                                  | 0.001      |
| 7                          | 3      | 5      | $\leftarrow$ | 6     | 3       | 4       | 6628.0592           | 0.0005                                   | 0.001      |
| 7                          | 3      | 4      | $\leftarrow$ | 6     | 3       | 3       | 6758.1434           | -0.0008                                  | 0.001      |
| 7                          | 4      | 4      | $\leftarrow$ | 6     | 4       | 3       | 6639.5468           | 0.0043                                   | 0.005      |
| 7                          | 4      | 3      | $\leftarrow$ | 6     | 4       | 2       | 6649.7932           | -0.0045                                  | 0.005      |
| 8                          | 0      | 8      | $\leftarrow$ | 7     | 0       | 7       | 6948.2442           | -0.0002                                  | 0.001      |
| 8                          | 1      | 8      | $\leftarrow$ | 7     | 1       | 7       | 6929.9277           | 0.0000                                   | 0.001      |
| 8                          | 1      | 7      | $\leftarrow$ | 7     | 1       | 6       | 7527.5185           | 0.0008                                   | 0.001      |
| 8                          | 2      | 7      | $\leftarrow$ | 7     | 2       | 6       | 7347.5649           | 0.0002                                   | 0.001      |
| 8                          | 2      | 6      | $\leftarrow$ | 7     | 2       | 5       | 7883.7132           | 0.0001                                   | 0.001      |

| $J'$            | $K'_a$ | $K'_c$ | $\leftarrow$ | $J''$ | $K''_a$ | $K''_c$ | $\nu_{\text{obs.}}$ | $\nu_{\text{obs.}} - \nu_{\text{calc.}}$ | exp. error |
|-----------------|--------|--------|--------------|-------|---------|---------|---------------------|------------------------------------------|------------|
| 8               | 3      | 6      | $\leftarrow$ | 7     | 3       | 5       | 7566.1961           | 0.0000                                   | 0.001      |
| 8               | 3      | 5      | $\leftarrow$ | 7     | 3       | 4       | 7792.1107           | -0.0006                                  | 0.001      |
| 8               | 4      | 5      | $\leftarrow$ | 7     | 4       | 4       | 7600.7272           | 0.0009                                   | 0.002      |
| 8               | 4      | 4      | $\leftarrow$ | 7     | 4       | 3       | 7627.8158           | -0.0007                                  | 0.001      |
| 9               | 0      | 9      | $\leftarrow$ | 8     | 0       | 8       | 7779.3182           | -0.0003                                  | 0.001      |
| 9               | 1      | 9      | $\leftarrow$ | 8     | 1       | 8       | 7769.5773           | 0.0001                                   | 0.001      |
| 9               | 1      | 8      | $\leftarrow$ | 8     | 1       | 7       | 8352.6042           | 0.0004                                   | 0.002      |
| 9               | 2      | 8      | $\leftarrow$ | 8     | 2       | 7       | 8217.7009           | 0.0003                                   | 0.002      |
| 9               | 3      | 7      | $\leftarrow$ | 8     | 3       | 6       | 8493.5214           | 0.0004                                   | 0.002      |
| 9               | 4      | 6      | $\leftarrow$ | 8     | 4       | 5       | 8562.4234           | 0.0002                                   | 0.002      |
| 10              | 0      | 10     | $\leftarrow$ | 9     | 0       | 9       | 8612.4127           | -0.0007                                  | 0.002      |
| 10              | 1      | 10     | $\leftarrow$ | 9     | 1       | 9       | 8607.4133           | -0.0006                                  | 0.002      |
| ${}^bR_{-1,-1}$ |        |        |              |       |         |         |                     |                                          |            |
| 7               | 0      | 7      | $\leftarrow$ | 6     | 1       | 6       | 6049.3682           | 0.0000                                   | 0.001      |
| 8               | 0      | 8      | $\leftarrow$ | 7     | 1       | 7       | 6910.3455           | 0.0000                                   | 0.001      |
| 8               | 1      | 7      | $\leftarrow$ | 7     | 2       | 6       | 6993.4085           | 0.0015                                   | 0.002      |
| 9               | 0      | 9      | $\leftarrow$ | 8     | 1       | 8       | 7759.7362           | -0.0002                                  | 0.001      |
| 9               | 1      | 8      | $\leftarrow$ | 8     | 2       | 7       | 7998.4476           | 0.0016                                   | 0.002      |
| ${}^bR_{1,1}$   |        |        |              |       |         |         |                     |                                          |            |
| 4               | 4      | 1      | $\leftarrow$ | 3     | 3       | 0       | 7654.1189           | 0.0003                                   | 0.002      |
| 4               | 4      | 0      | $\leftarrow$ | 3     | 3       | 1       | 7655.4492           | -0.0005                                  | 0.002      |
| 7               | 1      | 7      | $\leftarrow$ | 6     | 0       | 6       | 6157.9094           | 0.0002                                   | 0.001      |
| 8               | 1      | 8      | $\leftarrow$ | 7     | 0       | 7       | 6967.8265           | 0.0000                                   | 0.002      |
| 9               | 1      | 9      | $\leftarrow$ | 8     | 0       | 8       | 7789.1594           | 0.0001                                   | 0.002      |

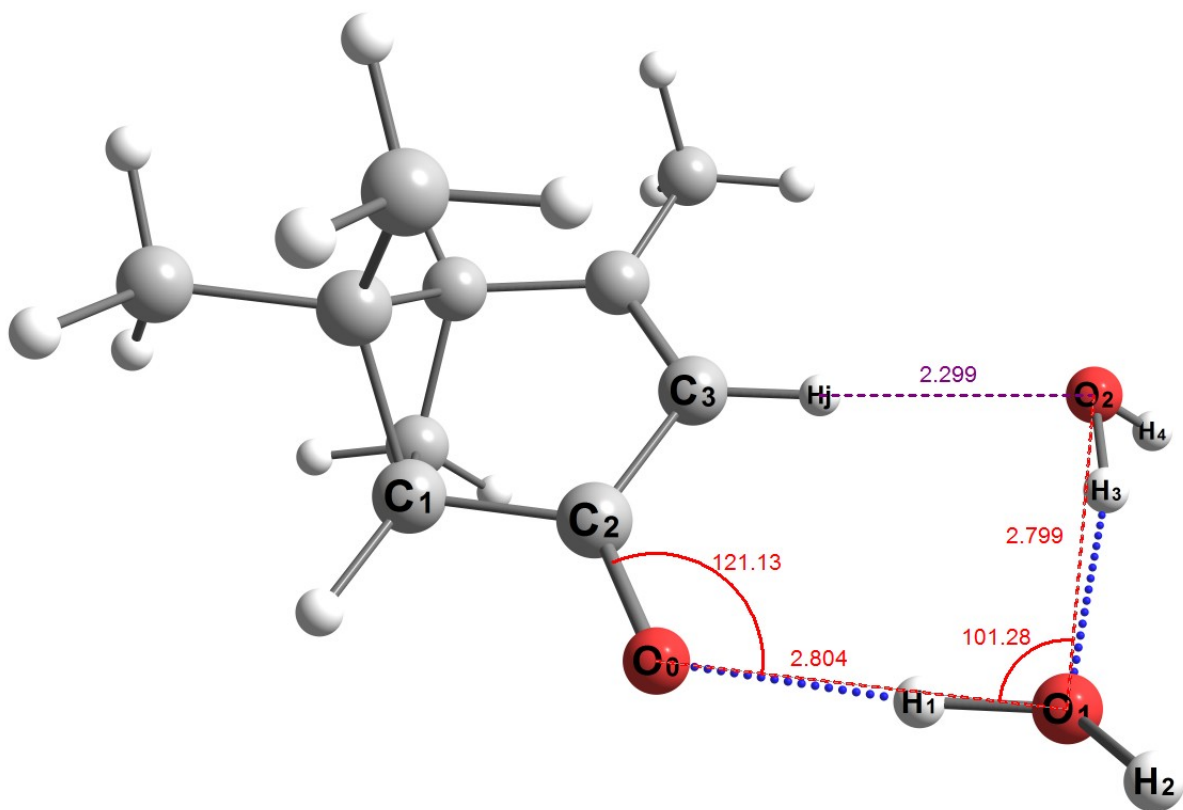

(a) 2w-II(a)

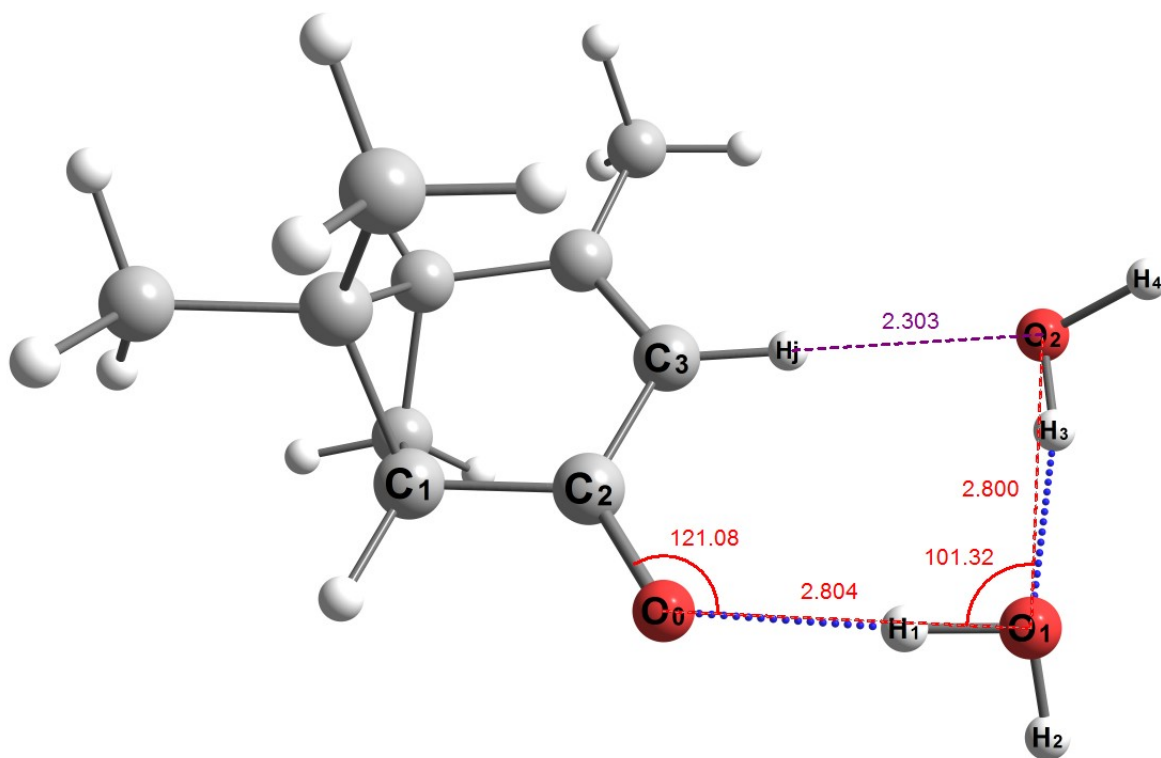

(b) 2w-II(b) (+0.22 kJ mol<sup>-1</sup>)

Figure S4: Two optimized (MP2/6-311++G(d,p)) close structures of the highest energy conformer 2w-II, differing by the orientation of the water molecules. Lengths expressed in Å, angles in °.

Table S18: Experimental rotational constants of the observed conformer of the dihydrate of verbenone 2w-II, and comparison with the sets of computed constants corresponding to the two possible structures 2w-II(a) and 2w-II(b) represented Fig. S4.

|                                     | Exp.           | 2w-II(a)         |                   |                  | 2w-II (b)        |                   |                  |         |      |
|-------------------------------------|----------------|------------------|-------------------|------------------|------------------|-------------------|------------------|---------|------|
|                                     |                | MP2 <sup>a</sup> | Dev. <sup>b</sup> | DFT <sup>c</sup> | MP2 <sup>a</sup> | Dev. <sup>b</sup> | DFT <sup>c</sup> |         |      |
| A/MHz                               | 1063.5954(14)  | 1070.50          | 0.65              | 1071.82          | 0.77             | 1077.08           | 1.27             | 1081.07 | 1.64 |
| B/MHz                               | 473.579785(93) | 471.32           | -0.48             | 481.30           | 1.63             | 468.32            | -1.11            | 475.71  | 0.45 |
| C/MHz                               | 395.166703(58) | 391.87           | -0.83             | 401.60           | 1.63             | 389.51            | -1.43            | 396.95  | 0.45 |
| $N_{\text{lines}}$                  | 68             |                  |                   |                  |                  |                   |                  |         |      |
| $\kappa^d$                          | -0.765         | -0.765           |                   | -0.762           |                  | -0.771            |                  | -0.770  |      |
| $P_a(u.\text{\AA}^2)$               | 935.4432(4)    | 944.91           |                   | 918.46           |                  | 953.70            |                  | 934.02  |      |
| $P_b(u.\text{\AA}^2)$               | 343.4576(4)    | 344.75           |                   | 339.95           |                  | 343.78            |                  | 339.13  |      |
| $P_c(u.\text{\AA}^2)$               | 131.7033(4)5   | 127.35           |                   | 131.57           |                  | 125.44            |                  | 128.35  |      |
| $ \mu_a /D$                         |                | 3.18             |                   | 3.77             |                  | 3.16              |                  | 3.86    |      |
| $ \mu_b /D$                         |                | 0.78             |                   | 1.12             |                  | 0.78              |                  | 1.11    |      |
| $ \mu_c /D$                         |                | 0.07             |                   | 0.17             |                  | 0.23              |                  | 0.17    |      |
| $\Delta E^e / (\text{kJ mol}^{-1})$ |                | 0.0              |                   | 0.0              |                  | 0.19              |                  | 0.22    |      |

<sup>a</sup> MP2 / 6-311++G(d,p) ; <sup>b</sup> Deviation (%) calculated as (calc. – exp.) / exp. ; <sup>c</sup> B3LYP-D3BJ / def2-TZVP ; <sup>d</sup>  $\kappa = (2B - A - C) / (A - C)$  ; <sup>e</sup> difference of energy, including ZPE correction, with respect to the lowest energy conformer 2w-II (a).





Table S19: Experimental rotational and quartic centrifugal distortion constants of the normal and of the  $\text{H}_2^{18}\text{O}$  substituted species of the complex of verbenone 2w-II.

|                             | Normal          | $^{18}\text{O}_1\text{-}^{18}\text{O}_2$ | $^{18}\text{O}_1\text{-}^{16}\text{O}_2$ | $^{16}\text{O}_1\text{-}^{18}\text{O}_2$ |
|-----------------------------|-----------------|------------------------------------------|------------------------------------------|------------------------------------------|
| $A$ (MHz)                   | 1063.5954(14)   | 1045.5043(10)                            | 1053.9684(35)                            | 1055.9401(29)                            |
| $B$ (MHz)                   | 473.579 785(93) | 449.475 942(36)                          | 461.878 251(70)                          | 460.146 792(66)                          |
| $C$ (MHz)                   | 395.166 703(58) | 376.067 902(34)                          | 385.726 504(61)                          | 384.886 165(44)                          |
| $\Delta_J$ (kHz)            | 0.082 89(31)    | 0.078 16(16)                             | <i>b</i>                                 | <i>b</i>                                 |
| $\Delta_{JK}$ (kHz)         | 0.1051(26)      | <i>b</i>                                 | <i>b</i>                                 | <i>b</i>                                 |
| $\Delta_K$ (kHz)            | -               | -                                        | -                                        | -                                        |
| $\delta_J$ (kHz)            | 0.005 50(22)    | <i>b</i>                                 | <i>b</i>                                 | <i>b</i>                                 |
| $\delta_K$ (kHz)            | 0.1095(32)      | <i>b</i>                                 | <i>b</i>                                 | <i>b</i>                                 |
| $N_{\text{lines}}^a$        | 49              | 40                                       | 18                                       | 25                                       |
| $\sigma_{\text{fit}}$ (kHz) | 0.81            | 0.69                                     | 0.86                                     | 0.88                                     |
| $P_a(u.\text{\AA}^2)$       | 935.4432(4)     | 992.4206(3)                              | 962.4408(8)                              | 966.3774(7)                              |
| $P_b(u.\text{\AA}^2)$       | 343.4576(4)     | 351.4298(3)                              | 347.7596(8)                              | 346.6836(7)                              |
| $P_c(u.\text{\AA}^2)$       | 131.7033(4)     | 131.9532(3)                              | 131.7415(8)                              | 131.9222(7)                              |

<sup>a</sup> The number of fitted lines ; <sup>b</sup> Fixed at the value of the normal species.

Table S20: Experimental coordinates (in Å, in the principal axes systems) of the water oxygen atoms in the observed conformer of the dihydrate of verbenone 2w-II, along with those obtained by *ab initio* and DFT calculations for the conformer 2w-II(a).

|                      | <i>a</i>     | <i>b</i>    | <i>c</i>    |
|----------------------|--------------|-------------|-------------|
| O <sub>1</sub>       |              |             |             |
| $r_s / \text{Å}$     | 3.6764(4)    | 1.5060(10)  | -0.143(11)  |
| $r_0 / \text{Å}$     | 3.691(5)     | 1.492(1)    | -0.143(1)   |
| MP2 <sup>a</sup> / Å | 3.772        | 1.487       | -0.158      |
| DFT <sup>b</sup> / Å | 3.693        | 1.483       | -0.170      |
| O <sub>2</sub>       |              |             |             |
| $r_s / \text{Å}$     | 3.938 44(38) | -1.3077(12) | -0.3411(44) |
| $r_0 / \text{Å}$     | 3.950(4)     | -1.291(2)   | -0.387(1)   |
| MP2 <sup>a</sup> / Å | 3.915        | -1.305      | -0.298      |
| DFT <sup>b</sup> / Å | 3.863        | -1.287      | -0.368      |

<sup>a</sup> MP2 / 6-311++G(d,p) ; <sup>b</sup> B3LYP-D3BJ / def2-TZVP .

Table S21: The substitution and effective structural parameters of the observed verbenone dihydrate 2w-II, along with those optimized by quantum chemistry for the conformer 2w-II(a).

| Parameters <sup>a</sup>                                   | $r_s$    | $r_0^b$    | B3LYP <sup>c</sup> | MP2 <sup>d</sup> |
|-----------------------------------------------------------|----------|------------|--------------------|------------------|
| $r(\text{O}_1\text{O}_0) / \text{Å}$                      | -        | 2.7466(44) | 2.759              | 2.804            |
| $r(\text{O}_2\text{O}_1) / \text{Å}$                      | 2.833(3) | 2.8050(14) | 2.782              | 2.799            |
| $\angle(\text{O}_1\text{O}_0\text{C}_2)^e / ^\circ$       | -        | 121.13(4)  | 119.8              | 121.1            |
| $\angle(\text{O}_2\text{O}_1\text{O}_0) / ^\circ$         | -        | 104.50(17) | 102.6              | 101.3            |
| $\tau(\text{O}_1\text{O}_0\text{C}_2\text{C}_1) / ^\circ$ | -        | 5.207(45)  | 5.0                | 5.0              |
| $\sigma_{\text{fit}} / \text{uÅ}^2$                       | -        | 0.127      | -                  | -                |

<sup>a</sup> Numbering scheme is shown Fig. S4a ; <sup>b</sup> Parameters involving the H atoms taken from the MP2/6-311++G(d,p) optimized geometry of conformer 2w-II(a) ; <sup>c</sup> B3LYP-D3BJ / def2-TZVP ; <sup>d</sup> MP2/6-311++G(d,p) ; <sup>e</sup> not fitted, calculated from the output coordinates.

Table S22: Experimental coordinates (in Å, in the principal axes systems) of the water oxygen atoms in the observed dihydrate of verbenone 2w-II, compared with those obtained by *ab initio* and DFT calculations for the conformer 2w-II(b).

|                      | <i>a</i>     | <i>b</i>    | <i>c</i>    |
|----------------------|--------------|-------------|-------------|
| O <sub>1</sub>       |              |             |             |
| $r_s / \text{Å}$     | 3.6764(4)    | 1.5060(10)  | -0.143(11)  |
| $r_0 / \text{Å}$     | 3.680(54)    | 1.495(5)    | -0.109(15)  |
| MP2 <sup>a</sup> / Å | 3.802        | 1.470       | -0.109      |
| DFT <sup>b</sup> / Å | 3.742        | 1.465       | -0.130      |
| O <sub>2</sub>       |              |             |             |
| $r_s / \text{Å}$     | 3.938 44(38) | -1.3077(12) | -0.3411(44) |
| $r_0 / \text{Å}$     | 3.934(5)     | -1.317(13)  | -0.429(23)  |
| MP2 <sup>a</sup> / Å | 3.920        | -1.321      | -0.295      |
| DFT <sup>b</sup> / Å | 3.887        | -1.305      | -0.330      |

<sup>a</sup> MP2 / 6-311++G(d,p) ; <sup>b</sup> B3LYP-D3BJ / def2-TZVP.

Table S23: The substitution and effective structural parameters of the observed verbenone dihydrate 2w-II, along with those optimized by quantum chemistry for the conformer 2w-II(b).

| Parameters <sup>a</sup>                                   | $r_s$    | $r_0$ <sup>b</sup> | B3LYP <sup>c</sup> | MP2 <sup>d</sup> |
|-----------------------------------------------------------|----------|--------------------|--------------------|------------------|
| $r(\text{O}_1\text{O}_0) / \text{Å}$                      | -        | 2.733(65)          | 2.760              | 2.804            |
| $r(\text{O}_2\text{O}_1) / \text{Å}$                      | 2.833(2) | 2.842(14)          | 2.781              | 2.800            |
| $\angle(\text{O}_1\text{O}_0\text{C}_2) / ^\circ$         | -        | 120.4(27)          | 120.4              | 121.1            |
| $\angle(\text{O}_2\text{O}_1\text{O}_0) / ^\circ$         | -        | 105.07(85)         | 102.3              | 101.3            |
| $\tau(\text{H}_4\text{O}_2\text{H}_3\text{O}_1) / ^\circ$ | -        | 157(20)            | 104.0              | 126.2            |
| $\sigma_{\text{fit}} / \text{uÅ}^2$                       | -        | 0.086              | -                  | -                |

<sup>a</sup> The numbering scheme is shown Fig. S4b ; <sup>b</sup> Parameters involving the H atoms taken from the MP2/6-311++G(d,p) optimized geometry of conformer 2w-II(b) ; <sup>c</sup> B3LYP-D3BJ / def2-TZVP ; <sup>d</sup> MP2/6-311++G(d,p).

Table S24: Measured frequencies ( $\nu_{\text{obs.}}$ ) and residuals ( $\nu_{\text{obs.}} - \nu_{\text{calc.}}$ ) in MHz of the dihydrate of verbenone 2w-II.

| $J'$                       | $K'_a$ | $K'_c$ | $\leftarrow$ | $J''$ | $K''_a$ | $K''_c$ | $\nu_{\text{obs.}}$ | $\nu_{\text{obs.}} - \nu_{\text{calc.}}$ | exp. error |
|----------------------------|--------|--------|--------------|-------|---------|---------|---------------------|------------------------------------------|------------|
| ${}^a R_{0,1}$ transitions |        |        |              |       |         |         |                     |                                          |            |
| 4                          | 0      | 4      | $\leftarrow$ | 3     | 0       | 3       | 3405.4152           | -0.0025                                  | 0.001      |
| 4                          | 1      | 4      | $\leftarrow$ | 3     | 1       | 3       | 3304.7219           | 0.0000                                   | 0.001      |
| 4                          | 1      | 3      | $\leftarrow$ | 3     | 1       | 2       | 3615.8183           | -0.0005                                  | 0.001      |
| 4                          | 2      | 3      | $\leftarrow$ | 3     | 2       | 2       | 3469.2668           | 0.0012                                   | 0.002      |
| 5                          | 0      | 5      | $\leftarrow$ | 4     | 0       | 4       | 4213.4589           | 0.0003                                   | 0.001      |
| 5                          | 1      | 5      | $\leftarrow$ | 4     | 1       | 4       | 4119.8503           | 0.0011                                   | 0.001      |
| 5                          | 1      | 4      | $\leftarrow$ | 4     | 1       | 3       | 4503.0825           | 0.0001                                   | 0.001      |
| 5                          | 2      | 4      | $\leftarrow$ | 4     | 2       | 3       | 4327.4606           | 0.0005                                   | 0.001      |
| 6                          | 0      | 6      | $\leftarrow$ | 5     | 0       | 5       | 5006.0682           | -0.0004                                  | 0.002      |
| 6                          | 1      | 6      | $\leftarrow$ | 5     | 1       | 5       | 4929.5258           | -0.0009                                  | 0.002      |
| 6                          | 1      | 5      | $\leftarrow$ | 5     | 1       | 4       | 5376.9810           | 0.0000                                   | 0.001      |
| 6                          | 2      | 5      | $\leftarrow$ | 5     | 2       | 4       | 5179.7185           | 0.0003                                   | 0.001      |
| 6                          | 2      | 4      | $\leftarrow$ | 5     | 2       | 3       | 5385.3162           | -0.0007                                  | 0.001      |
| 6                          | 3      | 4      | $\leftarrow$ | 5     | 3       | 3       | 5241.7035           | 0.0016                                   | 0.002      |
| 6                          | 3      | 3      | $\leftarrow$ | 5     | 3       | 2       | 5264.7078           | 0.0002                                   | 0.001      |
| 7                          | 0      | 7      | $\leftarrow$ | 6     | 0       | 6       | 5790.5070           | 0.0005                                   | 0.002      |
| 7                          | 1      | 7      | $\leftarrow$ | 6     | 1       | 6       | 5734.1772           | 0.0012                                   | 0.001      |
| 7                          | 1      | 6      | $\leftarrow$ | 6     | 1       | 5       | 6233.2210           | 0.0001                                   | 0.001      |
| 7                          | 2      | 6      | $\leftarrow$ | 6     | 2       | 5       | 6025.1070           | 0.0002                                   | 0.001      |
| 7                          | 2      | 5      | $\leftarrow$ | 6     | 2       | 4       | 6313.2732           | 0.0005                                   | 0.002      |
| 7                          | 3      | 5      | $\leftarrow$ | 6     | 3       | 4       | 6118.2958           | 0.0000                                   | 0.001      |
| 7                          | 3      | 4      | $\leftarrow$ | 6     | 3       | 3       | 6168.0767           | -0.0008                                  | 0.001      |
| 7                          | 4      | 4      | $\leftarrow$ | 6     | 4       | 3       | 6116.5468           | 0.0021                                   | 0.001      |
| 7                          | 4      | 3      | $\leftarrow$ | 6     | 4       | 2       | 6118.9827           | -0.0009                                  | 0.001      |
| 8                          | 0      | 8      | $\leftarrow$ | 7     | 0       | 7       | 6572.8144           | 0.0016                                   | 0.002      |
| 8                          | 1      | 8      | $\leftarrow$ | 7     | 1       | 7       | 6534.5690           | 0.0009                                   | 0.002      |
| 8                          | 1      | 7      | $\leftarrow$ | 7     | 1       | 6       | 7068.1195           | 0.0003                                   | 0.001      |
| 8                          | 2      | 7      | $\leftarrow$ | 7     | 2       | 6       | 6862.9479           | -0.0001                                  | 0.002      |
| 8                          | 2      | 6      | $\leftarrow$ | 7     | 2       | 5       | 7233.3429           | 0.0006                                   | 0.001      |

| $J'$                       | $K'_a$ | $K'_c$ | $\leftarrow$ | $J''$ | $K''_a$ | $K''_c$ | $\nu_{\text{obs.}}$ | $\nu_{\text{obs.}} - \nu_{\text{calc.}}$ | exp. error |
|----------------------------|--------|--------|--------------|-------|---------|---------|---------------------|------------------------------------------|------------|
| 7                          | 3      | 5      | $\leftarrow$ | 6     | 3       | 4       | 6118.2958           | 0.0000                                   | 0.001      |
| 7                          | 3      | 4      | $\leftarrow$ | 6     | 3       | 3       | 6168.0767           | -0.0008                                  | 0.001      |
| 7                          | 4      | 4      | $\leftarrow$ | 6     | 4       | 3       | 6116.5468           | 0.0021                                   | 0.001      |
| 7                          | 4      | 3      | $\leftarrow$ | 6     | 4       | 2       | 6118.9827           | -0.0009                                  | 0.001      |
| 8                          | 0      | 8      | $\leftarrow$ | 7     | 0       | 7       | 6572.8144           | 0.0016                                   | 0.002      |
| 8                          | 1      | 8      | $\leftarrow$ | 7     | 1       | 7       | 6534.5690           | 0.0009                                   | 0.002      |
| 8                          | 1      | 7      | $\leftarrow$ | 7     | 1       | 6       | 7068.1195           | 0.0003                                   | 0.001      |
| 8                          | 2      | 7      | $\leftarrow$ | 7     | 2       | 6       | 6862.9479           | -0.0001                                  | 0.002      |
| 8                          | 2      | 6      | $\leftarrow$ | 7     | 2       | 5       | 7233.3429           | 0.0006                                   | 0.001      |
| 8                          | 3      | 6      | $\leftarrow$ | 7     | 3       | 5       | 6992.7202           | -0.0002                                  | 0.001      |
| 8                          | 3      | 5      | $\leftarrow$ | 7     | 3       | 4       | 7086.2538           | -0.0002                                  | 0.001      |
| 8                          | 4      | 5      | $\leftarrow$ | 7     | 4       | 4       | 6998.4668           | 0.0005                                   | 0.001      |
| 8                          | 4      | 4      | $\leftarrow$ | 7     | 4       | 3       | 7005.0573           | -0.0011                                  | 0.001      |
| 9                          | 0      | 9      | $\leftarrow$ | 8     | 0       | 8       | 7356.1053           | -0.0003                                  | 0.001      |
| 9                          | 1      | 9      | $\leftarrow$ | 8     | 1       | 8       | 7331.6222           | -0.0001                                  | 0.001      |
| 9                          | 1      | 8      | $\leftarrow$ | 8     | 1       | 7       | 7880.4845           | -0.0004                                  | 0.001      |
| 9                          | 2      | 8      | $\leftarrow$ | 8     | 2       | 7       | 7692.9109           | -0.0021                                  | 0.001      |
| 9                          | 2      | 7      | $\leftarrow$ | 8     | 2       | 6       | 8139.8538           | 0.0009                                   | 0.001      |
| 10                         | 0      | 10     | $\leftarrow$ | 9     | 0       | 9       | 8141.2544           | -0.0003                                  | 0.001      |
| 10                         | 1      | 10     | $\leftarrow$ | 9     | 1       | 9       | 8126.2298           | -0.0007                                  | 0.001      |
| 11                         | 0      | 11     | $\leftarrow$ | 10    | 0       | 10      | 8928.0858           | 0.0000                                   | 0.001      |
| 11                         | 1      | 11     | $\leftarrow$ | 10    | 1       | 10      | 8919.1499           | 0.0025                                   | 0.002      |
| 12                         | 0      | 12     | $\leftarrow$ | 11    | 0       | 11      | 9716.1441           | -0.0009                                  | 0.002      |
| 12                         | 1      | 12     | $\leftarrow$ | 11    | 1       | 11      | 9710.9510           | 0.0010                                   | 0.002      |
| 13                         | 1      | 13     | $\leftarrow$ | 12    | 1       | 12      | 10502.0475          | 0.0011                                   | 0.002      |
| ${}^bR_{1,1}$ transitions  |        |        |              |       |         |         |                     |                                          |            |
| 8                          | 1      | 8      | $\leftarrow$ | 7     | 0       | 7       | 6633.1264           | 0.0005                                   | 0.002      |
| 9                          | 1      | 9      | $\leftarrow$ | 8     | 0       | 8       | 7391.9367           | 0.0012                                   | 0.002      |
| ${}^bR_{-1,1}$ transitions |        |        |              |       |         |         |                     |                                          |            |
| 8                          | 0      | 8      | $\leftarrow$ | 7     | 1       | 7       | 6474.2531           | -0.0018                                  | 0.002      |
| 9                          | 0      | 9      | $\leftarrow$ | 8     | 1       | 8       | 7295.7935           | 0.0009                                   | 0.002      |

Table S25: Measured frequencies ( $\nu_{\text{obs.}}$ ) and residuals ( $\nu_{\text{obs.}} - \nu_{\text{calc.}}$ ) in MHz of the dihydrate of verbenone 2w-II with the  $^{16}\text{O}_1$  atom substituted by a  $^{18}\text{O}$  atom.

| $J'$                     | $K'_a$ | $K'_c$ | $\leftarrow$ | $J''$ | $K''_a$ | $K''_c$ | $\nu_{\text{obs.}}$ | $\nu_{\text{obs.}} - \nu_{\text{calc.}}$ | exp. error |
|--------------------------|--------|--------|--------------|-------|---------|---------|---------------------|------------------------------------------|------------|
| $^a R_{0,1}$ transitions |        |        |              |       |         |         |                     |                                          |            |
| 6                        | 0      | 6      | $\leftarrow$ | 5     | 0       | 5       | 4889.1997           | 0.0000                                   | 0.002      |
| 6                        | 1      | 6      | $\leftarrow$ | 5     | 1       | 5       | 4811.9534           | -0.0023                                  | 0.001      |
| 6                        | 1      | 5      | $\leftarrow$ | 5     | 1       | 4       | 5247.7859           | -0.0003                                  | 0.002      |
| 6                        | 2      | 4      | $\leftarrow$ | 5     | 2       | 3       | 5250.4571           | 0.0000                                   | 0.002      |
| 7                        | 0      | 7      | $\leftarrow$ | 6     | 0       | 6       | 5655.3905           | 0.0000                                   | 0.001      |
| 7                        | 1      | 6      | $\leftarrow$ | 6     | 1       | 5       | 6085.0631           | -0.0019                                  | 0.002      |
| 7                        | 1      | 7      | $\leftarrow$ | 6     | 1       | 6       | 5597.7508           | -0.0007                                  | 0.002      |
| 7                        | 2      | 6      | $\leftarrow$ | 6     | 2       | 5       | 5880.3197           | -0.0027                                  | 0.002      |
| 7                        | 2      | 5      | $\leftarrow$ | 6     | 2       | 4       | 6155.8865           | -0.0021                                  | 0.002      |
| 8                        | 0      | 8      | $\leftarrow$ | 7     | 0       | 7       | 6419.0691           | 0.0010                                   | 0.002      |
| 8                        | 1      | 7      | $\leftarrow$ | 7     | 1       | 6       | 6902.2220           | 0.0002                                   | 0.002      |
| 8                        | 1      | 8      | $\leftarrow$ | 7     | 1       | 7       | 6379.3910           | 0.0008                                   | 0.002      |
| 8                        | 2      | 7      | $\leftarrow$ | 7     | 2       | 6       | 6698.7273           | -0.0008                                  | 0.002      |
| 8                        | 2      | 6      | $\leftarrow$ | 7     | 2       | 5       | 7054.4759           | 0.0011                                   | 0.001      |
| 8                        | 3      | 5      | $\leftarrow$ | 7     | 3       | 4       | 6908.2827           | 0.0000                                   | 0.002      |
| 9                        | 0      | 9      | $\leftarrow$ | 8     | 0       | 8       | 7183.4736           | 0.0014                                   | 0.002      |
| 9                        | 1      | 9      | $\leftarrow$ | 8     | 1       | 8       | 7157.7312           | 0.0010                                   | 0.001      |
| 9                        | 2      | 8      | $\leftarrow$ | 8     | 2       | 7       | 7509.6236           | 0.0012                                   | 0.002      |

Table S26: Measured frequencies ( $\nu_{\text{obs.}}$ ) and residuals ( $\nu_{\text{obs.}} - \nu_{\text{calc.}}$ ) in MHz of the dihydrate of verbenone 2w-II with the  $^{16}\text{O}_2$  atom substituted by a  $^{18}\text{O}$  atom.

| $J'$                    | $K'_a$ | $K'_c$ | $\leftarrow$ | $J''$ | $K''_a$ | $K''_c$ | $\nu_{\text{obs.}}$ | $\nu_{\text{obs.}} - \nu_{\text{calc.}}$ | exp. error |
|-------------------------|--------|--------|--------------|-------|---------|---------|---------------------|------------------------------------------|------------|
| $^aR_{0,1}$ transitions |        |        |              |       |         |         |                     |                                          |            |
| 5                       | 0      | 5      | $\leftarrow$ | 4     | 0       | 4       | 4104.8044           | 0.0005                                   | 0.002      |
| 5                       | 1      | 4      | $\leftarrow$ | 4     | 1       | 3       | 4379.9363           | -0.0013                                  | 0.002      |
| 6                       | 0      | 6      | $\leftarrow$ | 5     | 0       | 5       | 4878.2554           | -0.0020                                  | 0.002      |
| 6                       | 1      | 6      | $\leftarrow$ | 5     | 1       | 5       | 4800.3265           | -0.0018                                  | 0.001      |
| 6                       | 1      | 5      | $\leftarrow$ | 5     | 1       | 4       | 5231.7250           | -0.0002                                  | 0.001      |
| 6                       | 2      | 5      | $\leftarrow$ | 5     | 2       | 4       | 5040.1855           | -0.0021                                  | 0.002      |
| 6                       | 2      | 4      | $\leftarrow$ | 5     | 2       | 3       | 5231.4399           | -0.0005                                  | 0.002      |
| 7                       | 0      | 7      | $\leftarrow$ | 6     | 0       | 6       | 5643.1016           | -0.0011                                  | 0.002      |
| 7                       | 1      | 7      | $\leftarrow$ | 6     | 1       | 6       | 5584.5136           | -0.0013                                  | 0.001      |
| 7                       | 1      | 6      | $\leftarrow$ | 6     | 1       | 5       | 6067.5166           | 0.0000                                   | 0.001      |
| 7                       | 2      | 6      | $\leftarrow$ | 6     | 2       | 5       | 5863.7845           | -0.0008                                  | 0.002      |
| 7                       | 2      | 5      | $\leftarrow$ | 6     | 2       | 4       | 6133.7678           | 0.0012                                   | 0.002      |
| 8                       | 0      | 8      | $\leftarrow$ | 7     | 0       | 7       | 6405.2180           | -0.0005                                  | 0.001      |
| 8                       | 1      | 8      | $\leftarrow$ | 7     | 1       | 7       | 6364.5818           | -0.0007                                  | 0.002      |
| 8                       | 1      | 7      | $\leftarrow$ | 7     | 1       | 6       | 6883.7515           | -0.0011                                  | 0.002      |
| 8                       | 2      | 7      | $\leftarrow$ | 7     | 2       | 6       | 6680.3966           | -0.0005                                  | 0.002      |
| 8                       | 2      | 6      | $\leftarrow$ | 7     | 2       | 5       | 7029.7702           | 0.0030                                   | 0.002      |
| 9                       | 0      | 9      | $\leftarrow$ | 8     | 0       | 8       | 7167.9177           | 0.0005                                   | 0.001      |
| 9                       | 1      | 9      | $\leftarrow$ | 8     | 1       | 8       | 7141.3612           | 0.0003                                   | 0.001      |
| 9                       | 1      | 8      | $\leftarrow$ | 8     | 1       | 7       | 7678.8007           | 0.0011                                   | 0.002      |
| 9                       | 2      | 8      | $\leftarrow$ | 8     | 2       | 7       | 7489.6620           | 0.0008                                   | 0.002      |
| 10                      | 0      | 10     | $\leftarrow$ | 9     | 0       | 9       | 7932.3043           | 0.0021                                   | 0.001      |



Table S27: Measured frequencies ( $\nu_{\text{obs.}}$ ) and residuals ( $\nu_{\text{obs.}} - \nu_{\text{calc.}}$ ) in MHz of the dihydrate of verbenone 2w-II with the  $^{16}\text{O}_1$  and  $^{16}\text{O}_2$  atoms substituted by  $^{18}\text{O}$  atoms.

| $J'$                       | $K'_a$ | $K'_c$ | $\leftarrow$ | $J''$ | $K''_a$ | $K''_c$ | $\nu_{\text{obs.}}$ | $\nu_{\text{obs.}} - \nu_{\text{calc.}}$ | exp. error |
|----------------------------|--------|--------|--------------|-------|---------|---------|---------------------|------------------------------------------|------------|
| ${}^a R_{0,1}$ transitions |        |        |              |       |         |         |                     |                                          |            |
| 4                          | 1      | 4      | $\leftarrow$ | 3     | 1       | 3       | 3143.5727           | -0.0014                                  | 0.001      |
| 5                          | 0      | 5      | $\leftarrow$ | 4     | 0       | 4       | 4012.5680           | 0.0001                                   | 0.002      |
| 5                          | 1      | 4      | $\leftarrow$ | 4     | 1       | 3       | 4279.5384           | 0.0001                                   | 0.001      |
| 5                          | 1      | 5      | $\leftarrow$ | 4     | 1       | 4       | 3919.6845           | 0.0011                                   | 0.001      |
| 5                          | 2      | 3      | $\leftarrow$ | 4     | 2       | 2       | 4228.5122           | -0.0017                                  | 0.001      |
| 6                          | 0      | 6      | $\leftarrow$ | 5     | 0       | 5       | 4769.0542           | -0.0006                                  | 0.001      |
| 6                          | 1      | 6      | $\leftarrow$ | 5     | 1       | 5       | 4690.8559           | 0.0001                                   | 0.001      |
| 6                          | 2      | 5      | $\leftarrow$ | 5     | 2       | 4       | 4924.6712           | 0.0004                                   | 0.001      |
| 7                          | 0      | 7      | $\leftarrow$ | 6     | 0       | 6       | 5516.7892           | 0.0009                                   | 0.001      |
| 7                          | 1      | 7      | $\leftarrow$ | 6     | 1       | 6       | 5457.3817           | 0.0002                                   | 0.001      |
| 7                          | 1      | 6      | $\leftarrow$ | 6     | 1       | 5       | 5930.3403           | 0.0010                                   | 0.001      |
| 7                          | 2      | 5      | $\leftarrow$ | 6     | 2       | 4       | 5989.8379           | -0.0001                                  | 0.002      |
| 7                          | 2      | 6      | $\leftarrow$ | 6     | 2       | 5       | 5729.7745           | 0.0000                                   | 0.001      |
| 7                          | 3      | 4      | $\leftarrow$ | 6     | 3       | 3       | 5853.1678           | -0.0006                                  | 0.001      |
| 8                          | 0      | 8      | $\leftarrow$ | 7     | 0       | 7       | 6261.5172           | -0.0002                                  | 0.001      |
| 8                          | 1      | 8      | $\leftarrow$ | 7     | 1       | 7       | 6219.8785           | 0.0002                                   | 0.001      |
| 8                          | 1      | 7      | $\leftarrow$ | 7     | 1       | 6       | 6729.5474           | 0.0003                                   | 0.001      |
| 8                          | 2      | 7      | $\leftarrow$ | 7     | 2       | 6       | 6528.1891           | -0.0006                                  | 0.001      |
| 8                          | 2      | 6      | $\leftarrow$ | 7     | 2       | 5       | 6865.8570           | 0.0014                                   | 0.002      |
| 8                          | 3      | 5      | $\leftarrow$ | 7     | 3       | 4       | 6721.1743           | -0.0001                                  | 0.002      |
| 9                          | 0      | 9      | $\leftarrow$ | 8     | 0       | 8       | 7006.6201           | 0.0005                                   | 0.002      |
| 9                          | 1      | 8      | $\leftarrow$ | 8     | 1       | 7       | 7508.3465           | -0.0004                                  | 0.001      |
| 9                          | 1      | 9      | $\leftarrow$ | 8     | 1       | 8       | 6979.1297           | 0.0004                                   | 0.002      |
| 9                          | 2      | 8      | $\leftarrow$ | 8     | 2       | 7       | 7319.5437           | -0.0006                                  | 0.001      |
| 9                          | 2      | 8      | $\leftarrow$ | 8     | 2       | 7       | 7319.5441           | -0.0002                                  | 0.001      |
| 9                          | 2      | 7      | $\leftarrow$ | 8     | 2       | 6       | 7730.8339           | 0.0009                                   | 0.001      |
| 9                          | 3      | 7      | $\leftarrow$ | 8     | 3       | 6       | 7472.0294           | -0.0007                                  | 0.002      |
| 9                          | 3      | 6      | $\leftarrow$ | 8     | 3       | 5       | 7603.0063           | 0.0016                                   | 0.002      |
| 9                          | 4      | 6      | $\leftarrow$ | 8     | 4       | 5       | 7486.0286           | 0.0007                                   | 0.002      |

| $J'$           | $K'_a$ | $K'_c$ | $\leftarrow$ | $J''$ | $K''_a$ | $K''_c$ | $\nu_{\text{obs.}}$ | $\nu_{\text{obs.}} - \nu_{\text{calc.}}$ | exp. error |
|----------------|--------|--------|--------------|-------|---------|---------|---------------------|------------------------------------------|------------|
| 10             | 0      | 10     | $\leftarrow$ | 9     | 0       | 9       | 7753.3056           | -0.0005                                  | 0.002      |
| 10             | 1      | 10     | $\leftarrow$ | 9     | 1       | 9       | 7735.9310           | 0.0004                                   | 0.002      |
| 12             | 0      | 12     | $\leftarrow$ | 11    | 0       | 11      | 9251.2104           | 0.0014                                   | 0.002      |
| 12             | 1      | 11     | $\leftarrow$ | 11    | 1       | 10      | 9752.7856           | -0.0025                                  | 0.002      |
| 12             | 1      | 12     | $\leftarrow$ | 11    | 1       | 11      | 9244.8545           | 0.0020                                   | 0.002      |
| 12             | 2      | 11     | $\leftarrow$ | 11    | 2       | 10      | 9652.6489           | -0.0019                                  | 0.002      |
| ${}^bR_{-1,1}$ |        |        |              |       |         |         |                     |                                          |            |
| 7              | 0      | 7      | $\leftarrow$ | 6     | 1       | 6       | 5345.2057           | -0.0015                                  | 0.002      |
| 8              | 0      | 8      | $\leftarrow$ | 7     | 1       | 7       | 6149.3421           | -0.0011                                  | 0.002      |
| 9              | 0      | 9      | $\leftarrow$ | 8     | 1       | 8       | 6936.0855           | 0.0009                                   | 0.002      |
| ${}^bR_{1,1}$  |        |        |              |       |         |         |                     |                                          |            |
| 8              | 1      | 8      | $\leftarrow$ | 7     | 0       | 7       | 6332.0536           | 0.0011                                   | 0.002      |
| 9              | 1      | 9      | $\leftarrow$ | 8     | 0       | 8       | 7049.6634           | -0.0008                                  | 0.002      |

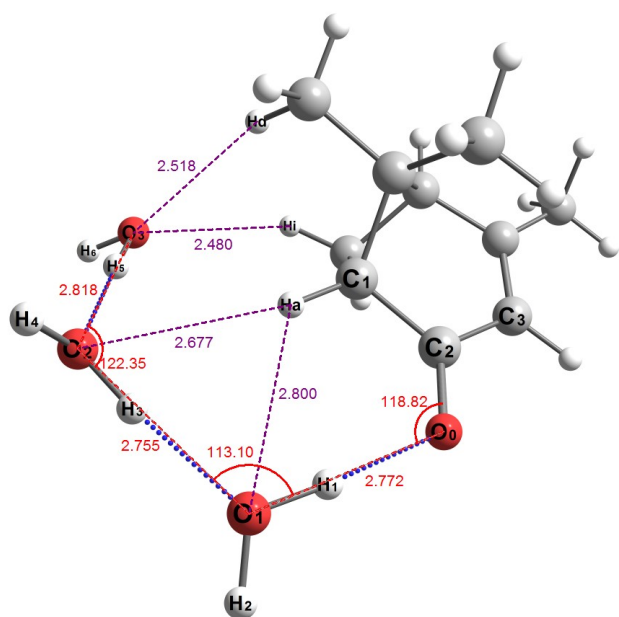

(a) 3w-I,  $\tau(\text{O}_0\text{O}_1\text{O}_2\text{O}_3) = 5.4^\circ$

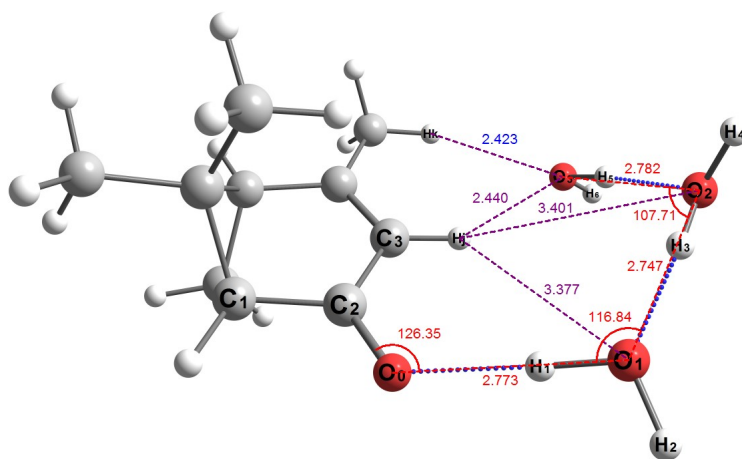

(b) 3w-II (+2.80 kJ mol<sup>-1</sup>),  $\tau(\text{O}_0\text{O}_1\text{O}_2\text{O}_3) = -27.3^\circ$

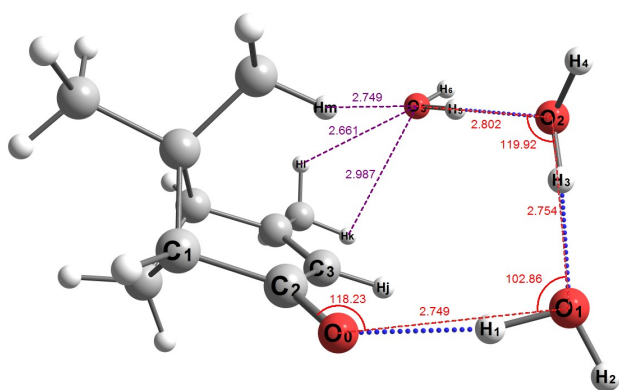

(c) 3w-III (+4.06 kJ mol<sup>-1</sup>),  $\tau(\text{O}_0\text{O}_1\text{O}_2\text{O}_3) = -47.3^\circ$

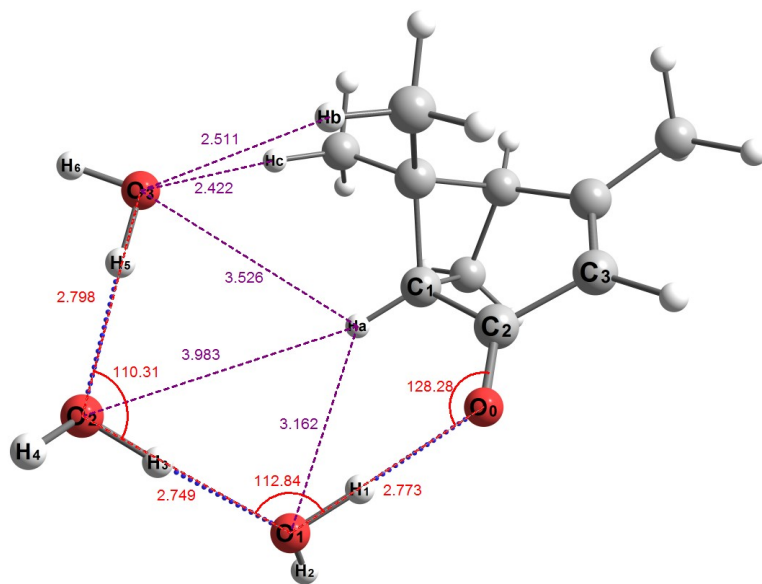

(d) 3w-IV (+5.67 kJ mol<sup>-1</sup>),  $\tau(\text{O}_0\text{O}_1\text{O}_2\text{O}_3) = 29.5^\circ$

Figure S5: The 4 optimized structures of the trihydrate of verbenone calculated at the MP2 / 6-311++G(d,p) level using Gaussian 16. Energies (including ZPE corrections) shown into parentheses are energies relative to the lowest energy conformer 3w-I. The pictures show how the terminal oxygen atom  $\text{O}_3$  of the chain of water molecules is anchored to verbenone by Van der Waals interactions, with lengths expressed in Å and angles in  $^\circ$ . The dihedral angle  $\tau(\text{O}_0\text{O}_1\text{O}_2\text{O}_3)$  of the four atoms of oxygen is given for each conformer.

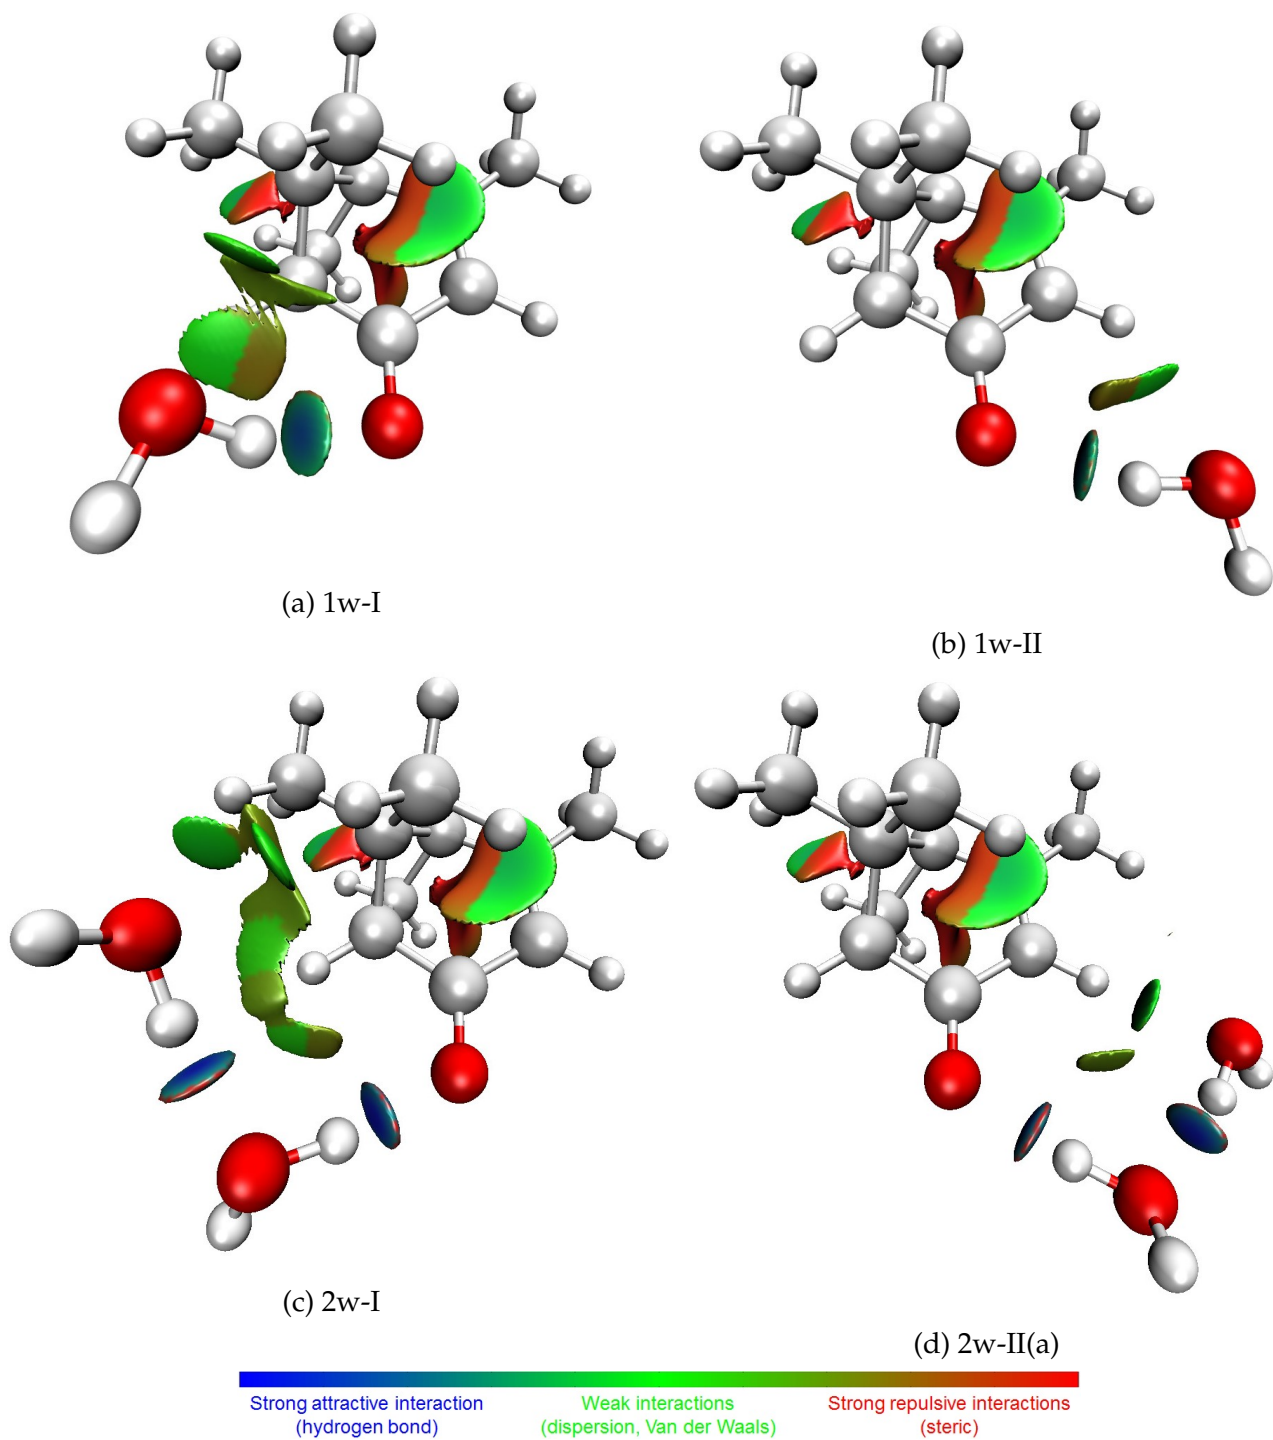

Figure S6: NCI plots showing the interactions in the mono and dihydrates of verbenone.

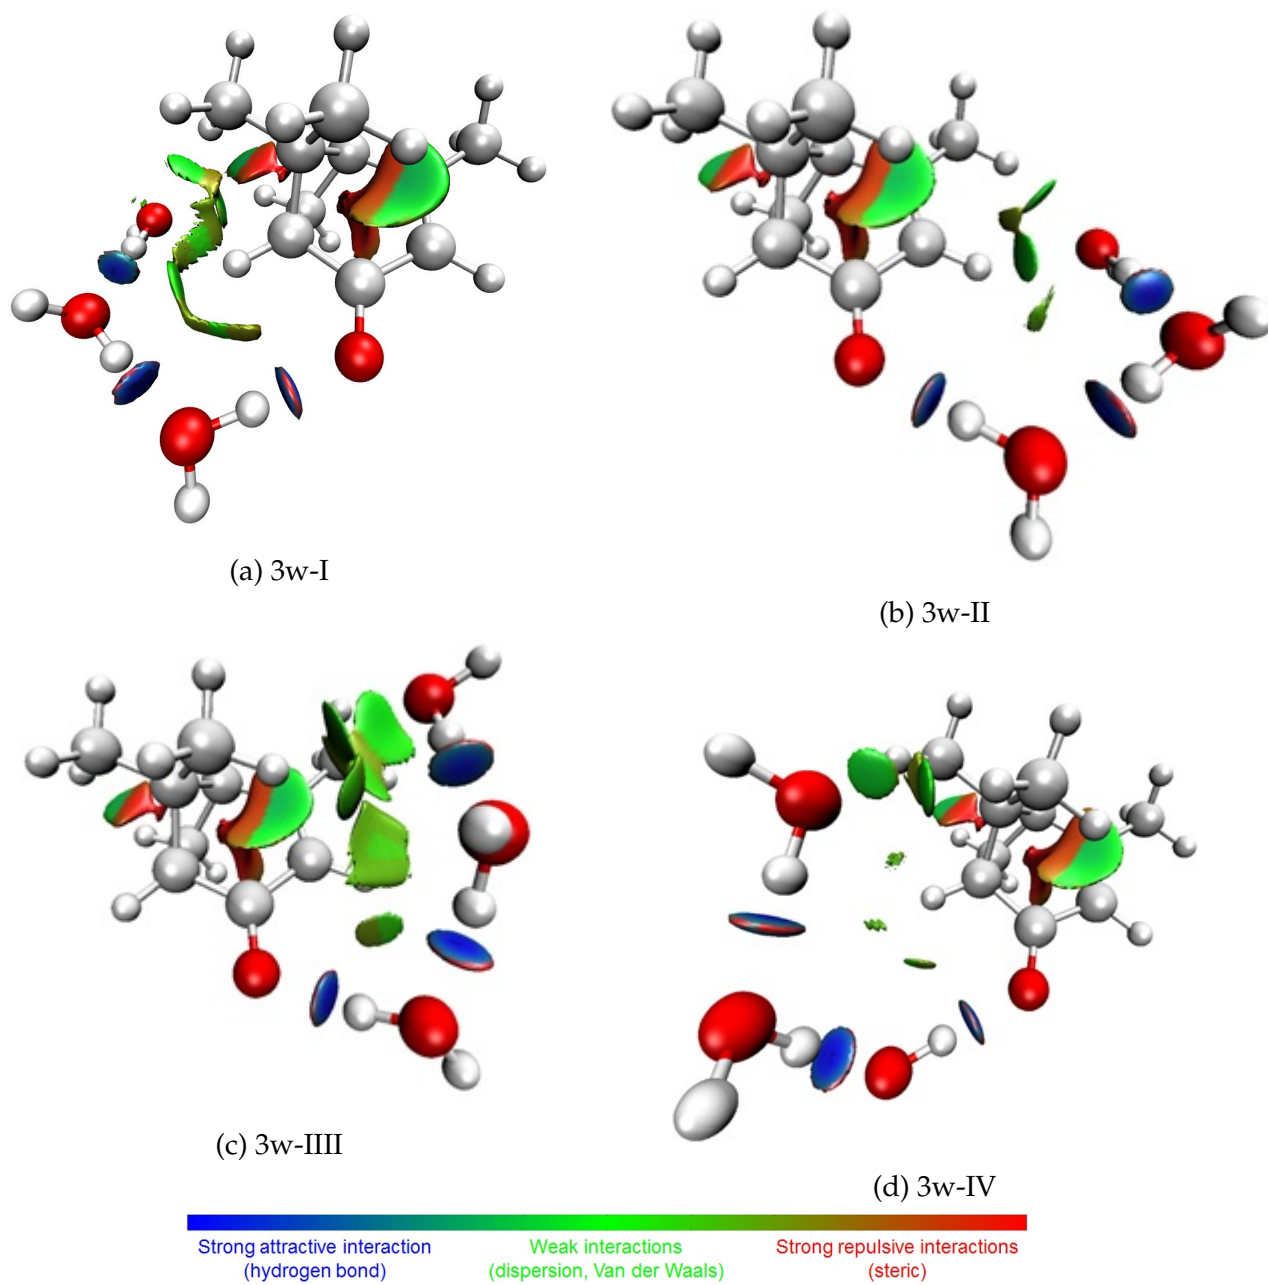

Figure S7: NCI plots showing the interactions in the trihydrates of verbenone.

Table S28: Calculated rotational constants, dipole moments and relative energies (including ZPE corrections) of the 4 trihydrates of verbenone shown Figure S5.

| Parameter                           | DFT <sup>a</sup> |        | MP2 <sup>b</sup> |        |
|-------------------------------------|------------------|--------|------------------|--------|
|                                     | 3w-I             |        | 3w-II            |        |
| <i>A</i> / MHz                      | 786.83           | 789.22 | 839.54           | 822.11 |
| <i>B</i> / MHz                      | 432.56           | 428.49 | 368.65           | 368.55 |
| <i>C</i> / MHz                      | 347.74           | 345.81 | 303.93           | 304.99 |
| $ \mu_a $ / D                       | 2.31             | 1.66   | 3.00             | 2.41   |
| $ \mu_b $ / D                       | 0.55             | 0.32   | 0.75             | 0.42   |
| $ \mu_c $ / D                       | 0.25             | 0.05   | 0.48             | 0.19   |
| $\Delta E^c$ / kJ mol <sup>-1</sup> | -                | -      | 1.28             | 2.80   |
|                                     | 3w-III           |        | 3w-IV            |        |
| <i>A</i> / MHz                      | 690.57           | 723.27 | 842.35           | 833.94 |
| <i>B</i> / MHz                      | 493.40           | 451.21 | 390.93           | 380.90 |
| <i>C</i> / MHz                      | 404.68           | 383.96 | 315.63           | 307.77 |
| $ \mu_a $ / D                       | 1.31             | 1.67   | 3.46             | 3.00   |
| $ \mu_b $ / D                       | 0.73             | 0.60   | 0.51             | 0.26   |
| $ \mu_c $ / D                       | 1.20             | 0.67   | 1.41             | 1.19   |
| $\Delta E^c$ / kJ mol <sup>-1</sup> | 1.74             | 4.06   | 4.36             | 5.67   |

<sup>a</sup> B3LYP-D3BJ/def2TZVP ; <sup>b</sup> MP2 / 6-311++G(d,p) ; <sup>c</sup> Energy gap relative to conformer 3w-I (including ZPE correction).

Table S29: Experimental rotational and quartic centrifugal distortion constants of the normal and of the  $\text{H}_2^{18}\text{O}$  substituted species of the trihydrate of verbenone 3w-I.

|                             | Normal                                                          | $^{18}\text{O}_1\text{-}^{18}\text{O}_2\text{-}^{18}\text{O}_3$ | $^{18}\text{O}_1\text{-}^{18}\text{O}_2\text{-}^{16}\text{O}_3$ | $^{18}\text{O}_1\text{-}^{16}\text{O}_2\text{-}^{18}\text{O}_3$ |
|-----------------------------|-----------------------------------------------------------------|-----------------------------------------------------------------|-----------------------------------------------------------------|-----------------------------------------------------------------|
| $A$ (MHz)                   | 786.574 06(35)                                                  | 757.324 99(47)                                                  | 773.0744(18)                                                    | 757.6496(24)                                                    |
| $B$ (MHz)                   | 422.802 573(55)                                                 | 401.930 189(31)                                                 | 407.005 360(78)                                                 | 411.544 25(12)                                                  |
| $C$ (MHz)                   | 342.662 068(35)                                                 | 324.836 651(28)                                                 | 329.858 360(48)                                                 | 331.067 339(51)                                                 |
| $\Delta_J$ (kHz)            | 0.047 53(15)                                                    | 0.044 92(15)                                                    | <i>c</i>                                                        | <i>c</i>                                                        |
| $\Delta_{JK}$ (kHz)         | 0.1414(15)                                                      | <i>b</i>                                                        | <i>b</i>                                                        | <i>b</i>                                                        |
| $\Delta_K$ (kHz)            | -                                                               | -                                                               | -                                                               | -                                                               |
| $\delta_J$ (kHz)            | 0.004 51(12)                                                    | <i>b</i>                                                        | <i>b</i>                                                        | <i>b</i>                                                        |
| $\delta_K$ (kHz)            | -                                                               | -                                                               | -                                                               | -                                                               |
| $N_{\text{lines}}^a$        | 66                                                              | 45                                                              | 20                                                              | 20                                                              |
| $\sigma_{\text{fit}}$ (kHz) | 0.91                                                            | 1.01                                                            | 1.41                                                            | 0.93                                                            |
| $P_a(u.\text{\AA}^2)$       | 1013.8310(2)                                                    | 1072.9266(3)                                                    | 1060.0420(8)                                                    | 1043.7427(10)                                                   |
| $P_b(u.\text{\AA}^2)$       | 461.0303(2)                                                     | 482.8677(3)                                                     | 472.0671(8)                                                     | 482.7715(10)                                                    |
| $P_c(u.\text{\AA}^2)$       | 181.4763(2)                                                     | 184.4535(3)                                                     | 181.6591(8)                                                     | 184.2638(10)                                                    |
|                             | $^{16}\text{O}_1\text{-}^{18}\text{O}_2\text{-}^{18}\text{O}_3$ | $^{18}\text{O}_1\text{-}^{16}\text{O}_2\text{-}^{16}\text{O}_3$ | $^{16}\text{O}_1\text{-}^{18}\text{O}_2\text{-}^{16}\text{O}_3$ | $^{16}\text{O}_1\text{-}^{16}\text{O}_2\text{-}^{18}\text{O}_3$ |
| $A$ (MHz)                   | 770.8859(13)                                                    | 773.4845(19)                                                    | 786.2821(18)                                                    | 771.1516(26)                                                    |
| $B$ (MHz)                   | 406.908 981(55)                                                 | 416.961 457(85)                                                 | 412.392 651(56)                                                 | 416.926 829(89)                                                 |
| $C$ (MHz)                   | 330.588 969(34)                                                 | 336.382 225(39)                                                 | 335.804 323(34)                                                 | 337.134 294(51)                                                 |
| $\Delta_J$ (kHz)            | <i>c</i>                                                        | <i>b</i>                                                        | <i>b</i>                                                        | <i>b</i>                                                        |
| $\Delta_{JK}$ (kHz)         | <i>b</i>                                                        | <i>b</i>                                                        | <i>b</i>                                                        | <i>b</i>                                                        |
| $\Delta_K$ (kHz)            | -                                                               | -                                                               | -                                                               | -                                                               |
| $\delta_J$ (kHz)            | <i>b</i>                                                        | <i>b</i>                                                        | <i>b</i>                                                        | <i>b</i>                                                        |
| $\delta_K$ (kHz)            | -                                                               | -                                                               | -                                                               | -                                                               |
| $N_{\text{lines}}^a$        | 18                                                              | 14                                                              | 13                                                              | 14                                                              |
| $\sigma_{\text{fit}}$ (kHz) | 0.89                                                            | 0.90                                                            | 0.79                                                            | 1.59                                                            |
| $P_a(u.\text{\AA}^2)$       | 1057.5681(6)                                                    | 1030.5338(9)                                                    | 1043.8578(8)                                                    | 1027.9201(12)                                                   |
| $P_b(u.\text{\AA}^2)$       | 471.1550(6)                                                     | 471.8613(9)                                                     | 461.1228(8)                                                     | 471.1235(12)                                                    |
| $P_c(u.\text{\AA}^2)$       | 184.4271(6)                                                     | 181.5183(9)                                                     | 181.6223(8)                                                     | 184.2327(12)                                                    |

<sup>a</sup> The number of fitted lines ; <sup>b</sup> fixed at the value of the normal species ; <sup>c</sup> fixed at the value of the totally substituted species.

Table S30: Experimental coordinates (in Å, in the principal axes systems) of the water oxygen atoms O<sub>1</sub>, O<sub>2</sub> and O<sub>3</sub> of the verbenone trihydrate 3w-I, along with those obtained by *ab initio* and DFT calculations.

|                             | <i>a</i>   | <i>b</i>   | <i>c</i>  |
|-----------------------------|------------|------------|-----------|
| O <sub>1</sub>              |            |            |           |
| <i>r<sub>s</sub></i> / Å    | −2.8723(5) | −2.3709(6) | 0.150(10) |
| <i>r<sub>0</sub></i> / Å    | −2.871(7)  | −2.367(5)  | 0.214(5)  |
| MP2 <sup><i>a</i></sup> / Å | −2.874     | −2.349     | 0.224     |
| DFT <sup><i>b</i></sup> / Å | −2.865     | −2.342     | 0.215     |
| O <sub>2</sub>              |            |            |           |
| <i>r<sub>s</sub></i> / Å    | −3.8889(4) | 0.222(7)   | 0.276(5)  |
| <i>r<sub>0</sub></i> / Å    | −3.902(5)  | 0.193(4)   | 0.188(10) |
| MP2 <sup><i>a</i></sup> / Å | −3.895     | 0.208      | 0.138     |
| DFT <sup><i>b</i></sup> / Å | −3.880     | 0.186      | 0.099     |
| O <sub>3</sub>              |            |            |           |
| <i>r<sub>s</sub></i> / Å    | −2.6355(6) | 2.2724(7)  | −1.210(1) |
| <i>r<sub>0</sub></i> / Å    | −2.643(8)  | 2.312(5)   | −1.178(5) |
| MP2 <sup><i>a</i></sup> / Å | −2.551     | 2.326      | −1.145    |
| DFT <sup><i>b</i></sup> / Å | −2.559     | 2.328      | −1.119    |

<sup>*a*</sup> MP2 / 6-311++G(d,p); <sup>*b*</sup> B3LYP-D3BJ / def2-TZVP.



Table S31: The substitution and effective structural parameters of the verbenone trihydrate 3w-I along with those optimized by quantum chemistry.

| Parameters <sup>a</sup>                                   | $r_s$      | $r_0^b$    | B3LYP <sup>c</sup> | MP2 <sup>d</sup> |
|-----------------------------------------------------------|------------|------------|--------------------|------------------|
| $r(\text{O}_1\text{O}_0)/\text{\AA}$                      | -          | 2.7944(34) | 2.723              | 2.772            |
| $r(\text{O}_2\text{O}_1)/\text{\AA}$                      | 2.7876(64) | 2.760(11)  | 2.726              | 2.755            |
| $r(\text{O}_3\text{O}_2)/\text{\AA}$                      | 2.8256(58) | 2.812(11)  | 2.797              | 2.818            |
| $\angle(\text{O}_1\text{O}_0\text{C}_2)^e / ^\circ$       | -          | 118.83(18) | 119.4              | 118.8            |
| $\angle(\text{O}_2\text{O}_1\text{O}_0)^e / ^\circ$       | -          | 113.10(22) | 113.4              | 113.1            |
| $\angle(\text{O}_3\text{O}_2\text{O}_1)^e / ^\circ$       | 119.30(18) | 122.35(29) | 123.6              | 122.4            |
| $\tau(\text{O}_1\text{O}_0\text{C}_2\text{C}_1) / ^\circ$ | -          | 178.34(15) | 176.8              | 178.3            |
| $\tau(\text{O}_2\text{O}_1\text{O}_0\text{C}_2) / ^\circ$ | -          | 5.55(39)   | 2.9                | 6.6              |
| $\tau(\text{O}_0\text{O}_1\text{O}_2\text{O}_3) / ^\circ$ | -          | 24.73(73)  | 21.6               | 20.9             |
| $\sigma_{\text{fit}}/\text{u\AA}^2$                       | -          | 0.180      | -                  | -                |

<sup>a</sup> The numbering scheme is shown Fig. S5a ; <sup>b</sup> Parameters involving the H atoms taken from the MP2/6-311++G(d,p) optimized geometry ; <sup>c</sup> B3LYP-D3BJ / def2-TZVP ; <sup>d</sup> MP2/6-311++G(d,p) ; <sup>e</sup> not fitted, calculated from the output coordinates.

Table S32: Measured frequencies ( $\nu_{\text{obs.}}$ ) and residuals ( $\nu_{\text{obs.}} - \nu_{\text{calc.}}$ ) in MHz of the trihydrate of verbenone 3w-I.

| $J'$                      | $K'_a$ | $K'_c$ | $\leftarrow$ | $J''$ | $K''_a$ | $K''_c$ | $\nu_{\text{obs.}}$ | $\nu_{\text{obs.}} - \nu_{\text{calc.}}$ | exp. error |
|---------------------------|--------|--------|--------------|-------|---------|---------|---------------------|------------------------------------------|------------|
| ${}^aR_{0,1}$ transitions |        |        |              |       |         |         |                     |                                          |            |
| 3                         | 0      | 3      | $\leftarrow$ | 2     | 0       | 2       | 2250.6443           | 0.0000                                   | 0.002      |
| 4                         | 0      | 4      | $\leftarrow$ | 3     | 0       | 3       | 2956.3061           | 0.0006                                   | 0.001      |
| 4                         | 1      | 3      | $\leftarrow$ | 3     | 1       | 2       | 3194.8542           | -0.0007                                  | 0.001      |
| 4                         | 1      | 4      | $\leftarrow$ | 3     | 1       | 3       | 2880.8443           | -0.0010                                  | 0.001      |
| 5                         | 1      | 4      | $\leftarrow$ | 4     | 1       | 3       | 3963.8140           | 0.0001                                   | 0.001      |
| 5                         | 1      | 5      | $\leftarrow$ | 4     | 1       | 4       | 3585.3233           | -0.0002                                  | 0.001      |
| 5                         | 2      | 4      | $\leftarrow$ | 4     | 2       | 3       | 3801.0317           | 0.0009                                   | 0.001      |
| 6                         | 0      | 6      | $\leftarrow$ | 5     | 0       | 5       | 4320.4549           | 0.0000                                   | 0.001      |
| 6                         | 1      | 5      | $\leftarrow$ | 5     | 1       | 4       | 4708.5867           | 0.0005                                   | 0.001      |
| 6                         | 1      | 6      | $\leftarrow$ | 5     | 1       | 5       | 4283.4962           | 0.0000                                   | 0.001      |
| 6                         | 2      | 4      | $\leftarrow$ | 5     | 2       | 3       | 4809.5395           | 0.0000                                   | 0.001      |
| 6                         | 2      | 5      | $\leftarrow$ | 5     | 2       | 4       | 4540.2555           | -0.0003                                  | 0.001      |
| 7                         | 0      | 7      | $\leftarrow$ | 6     | 0       | 6       | 4998.2089           | 0.0002                                   | 0.001      |
| 7                         | 1      | 7      | $\leftarrow$ | 6     | 1       | 6       | 4976.7744           | 0.0001                                   | 0.001      |
| 7                         | 1      | 6      | $\leftarrow$ | 6     | 1       | 5       | 5424.6408           | 0.0001                                   | 0.001      |
| 7                         | 2      | 5      | $\leftarrow$ | 6     | 2       | 4       | 5619.6004           | 0.0003                                   | 0.001      |
| 7                         | 2      | 6      | $\leftarrow$ | 6     | 2       | 5       | 5269.3649           | 0.0003                                   | 0.001      |
| 7                         | 3      | 4      | $\leftarrow$ | 6     | 3       | 3       | 5514.4088           | -0.0003                                  | 0.001      |
| 7                         | 3      | 5      | $\leftarrow$ | 6     | 3       | 4       | 5401.6279           | -0.0004                                  | 0.001      |
| 8                         | 0      | 8      | $\leftarrow$ | 7     | 0       | 7       | 5678.2234           | -0.0002                                  | 0.001      |
| 8                         | 1      | 8      | $\leftarrow$ | 7     | 1       | 7       | 5666.6656           | 0.0000                                   | 0.001      |
| 8                         | 1      | 7      | $\leftarrow$ | 7     | 1       | 6       | 6114.4459           | 0.0001                                   | 0.001      |
| 8                         | 2      | 7      | $\leftarrow$ | 7     | 2       | 6       | 5988.2643           | 0.0000                                   | 0.001      |
| 8                         | 2      | 6      | $\leftarrow$ | 7     | 2       | 5       | 6408.0763           | 0.0002                                   | 0.001      |
| 8                         | 3      | 5      | $\leftarrow$ | 7     | 3       | 4       | 6356.7308           | 0.0011                                   | 0.001      |
| 8                         | 3      | 6      | $\leftarrow$ | 7     | 3       | 5       | 6164.6766           | -0.0002                                  | 0.001      |
| 8                         | 4      | 5      | $\leftarrow$ | 7     | 4       | 4       | 6196.7190           | 0.0011                                   | 0.001      |
| 8                         | 4      | 4      | $\leftarrow$ | 7     | 4       | 3       | 6222.2705           | -0.0014                                  | 0.001      |
| 9                         | 0      | 9      | $\leftarrow$ | 8     | 0       | 8       | 6360.3647           | -0.0001                                  | 0.001      |

| $J'$ | $K'_a$ | $K'_c$ | $\leftarrow$ | $J''$ | $K''_a$ | $K''_c$ | $\nu_{\text{obs.}}$ | $\nu_{\text{obs.}} - \nu_{\text{calc.}}$ | exp. error |
|------|--------|--------|--------------|-------|---------|---------|---------------------|------------------------------------------|------------|
| 9    | 1      | 9      | $\leftarrow$ | 8     | 1       | 8       | 6354.4312           | 0.0004                                   | 0.001      |
| 9    | 1      | 8      | $\leftarrow$ | 8     | 1       | 7       | 6788.2245           | 0.0000                                   | 0.001      |
| 9    | 2      | 8      | $\leftarrow$ | 8     | 2       | 7       | 6697.7347           | 0.0003                                   | 0.001      |
| 9    | 2      | 7      | $\leftarrow$ | 8     | 2       | 6       | 7169.2727           | 0.0002                                   | 0.001      |
| 9    | 3      | 7      | $\leftarrow$ | 8     | 3       | 6       | 6918.4394           | -0.0001                                  | 0.001      |
| 9    | 3      | 6      | $\leftarrow$ | 8     | 3       | 5       | 7201.8575           | -0.0007                                  | 0.001      |
| 9    | 4      | 5      | $\leftarrow$ | 8     | 4       | 4       | 7036.7628           | -0.0007                                  | 0.001      |
| 9    | 4      | 6      | $\leftarrow$ | 8     | 4       | 5       | 6979.7631           | 0.0003                                   | 0.001      |
| 10   | 0      | 10     | $\leftarrow$ | 9     | 0       | 9       | 7043.9065           | -0.0004                                  | 0.001      |
| 10   | 1      | 10     | $\leftarrow$ | 9     | 1       | 9       | 7040.9644           | 0.0004                                   | 0.001      |
| 10   | 1      | 9      | $\leftarrow$ | 9     | 1       | 8       | 7457.6063           | -0.0003                                  | 0.001      |
| 10   | 2      | 9      | $\leftarrow$ | 9     | 2       | 8       | 7399.2654           | 0.0005                                   | 0.001      |
| 10   | 2      | 8      | $\leftarrow$ | 9     | 2       | 7       | 7898.7903           | 0.0001                                   | 0.001      |
| 10   | 3      | 8      | $\leftarrow$ | 9     | 3       | 7       | 7661.3000           | 0.0003                                   | 0.001      |
| 10   | 3      | 7      | $\leftarrow$ | 9     | 3       | 6       | 8035.1826           | 0.0000                                   | 0.001      |
| 10   | 4      | 6      | $\leftarrow$ | 9     | 4       | 5       | 7870.4405           | -0.0007                                  | 0.001      |
| 10   | 4      | 7      | $\leftarrow$ | 9     | 4       | 6       | 7759.9294           | -0.0010                                  | 0.001      |
| 10   | 5      | 5      | $\leftarrow$ | 9     | 5       | 4       | 7764.7594           | -0.0044                                  | 0.002      |
| 10   | 5      | 6      | $\leftarrow$ | 9     | 5       | 5       | 7753.9358           | 0.0017                                   | 0.001      |
| 11   | 0      | 11     | $\leftarrow$ | 10    | 0       | 10      | 7728.2482           | -0.0017                                  | 0.001      |
| 11   | 1      | 11     | $\leftarrow$ | 10    | 1       | 10      | 7726.8280           | 0.0007                                   | 0.001      |
| 11   | 1      | 10     | $\leftarrow$ | 10    | 1       | 9       | 8129.3959           | 0.0000                                   | 0.001      |
| 11   | 2      | 10     | $\leftarrow$ | 10    | 2       | 9       | 8094.7065           | 0.0010                                   | 0.001      |
| 11   | 3      | 9      | $\leftarrow$ | 10    | 3       | 8       | 8392.5769           | 0.0008                                   | 0.002      |

| $J'$           | $K'_a$ | $K'_c$ | $\leftarrow$ | $J''$ | $K''_a$ | $K''_c$ | $\nu_{\text{obs.}}$ | $\nu_{\text{obs.}} - \nu_{\text{calc.}}$ | exp. error |
|----------------|--------|--------|--------------|-------|---------|---------|---------------------|------------------------------------------|------------|
| ${}^bR_{-1,1}$ |        |        |              |       |         |         |                     |                                          |            |
| 5              | 0      | 5      | $\leftarrow$ | 4     | 1       | 4       | 3503.8192           | 0.0000                                   | 0.002      |
| 6              | 0      | 6      | $\leftarrow$ | 5     | 1       | 5       | 4238.9512           | 0.0005                                   | 0.002      |
| 7              | 0      | 7      | $\leftarrow$ | 6     | 1       | 6       | 4953.6633           | 0.0000                                   | 0.001      |
| 8              | 0      | 8      | $\leftarrow$ | 7     | 1       | 7       | 5655.1132           | 0.0006                                   | 0.002      |
| 8              | 1      | 7      | $\leftarrow$ | 7     | 2       | 6       | 5763.9780           | 0.0021                                   | 0.002      |
| 9              | 0      | 9      | $\leftarrow$ | 8     | 1       | 8       | 6348.8112           | -0.0006                                  | 0.001      |
| 10             | 0      | 10     | $\leftarrow$ | 9     | 1       | 9       | 7038.2869           | -0.0011                                  | 0.002      |
| ${}^bR_{1,1}$  |        |        |              |       |         |         |                     |                                          |            |
| 6              | 1      | 6      | $\leftarrow$ | 5     | 0       | 5       | 4364.9999           | -0.0005                                  | 0.002      |
| 7              | 1      | 7      | $\leftarrow$ | 6     | 0       | 6       | 5021.3186           | -0.0011                                  | 0.002      |
| 7              | 2      | 6      | $\leftarrow$ | 6     | 1       | 5       | 5775.1087           | -0.0018                                  | 0.002      |
| 8              | 1      | 8      | $\leftarrow$ | 7     | 0       | 7       | 5689.7761           | -0.0004                                  | 0.001      |
| 9              | 1      | 9      | $\leftarrow$ | 8     | 0       | 8       | 6365.9845           | 0.0008                                   | 0.002      |
| 10             | 1      | 10     | $\leftarrow$ | 9     | 0       | 9       | 7046.5837           | 0.0009                                   | 0.002      |

Table S33: Measured frequencies ( $\nu_{\text{obs.}}$ ) and residuals ( $\nu_{\text{obs.}} - \nu_{\text{calc.}}$ ) in MHz of the trihydrate of verbenone 3w-I with the O<sub>1</sub> atom substituted by a <sup>18</sup>O atom.

| $J'$                               | $K'_a$ | $K'_c$ | $\leftarrow$ | $J''$ | $K''_a$ | $K''_c$ | $\nu_{\text{obs.}}$ | $\nu_{\text{obs.}} - \nu_{\text{calc.}}$ | exp. error |
|------------------------------------|--------|--------|--------------|-------|---------|---------|---------------------|------------------------------------------|------------|
| <sup>a</sup> $R_{0,1}$ transitions |        |        |              |       |         |         |                     |                                          |            |
| 5                                  | 0      | 5      | $\leftarrow$ | 4     | 0       | 4       | 3578.2168           | -0.0006                                  | 0.002      |
| 6                                  | 0      | 6      | $\leftarrow$ | 5     | 0       | 5       | 4243.4597           | -0.0008                                  | 0.001      |
| 6                                  | 1      | 6      | $\leftarrow$ | 5     | 1       | 5       | 4207.9773           | -0.0009                                  | 0.002      |
| 6                                  | 1      | 5      | $\leftarrow$ | 5     | 1       | 4       | 4633.0717           | -0.0006                                  | 0.002      |
| 6                                  | 2      | 4      | $\leftarrow$ | 5     | 2       | 3       | 4739.3913           | -0.0015                                  | 0.002      |
| 7                                  | 0      | 7      | $\leftarrow$ | 6     | 0       | 6       | 4908.7505           | -0.0008                                  | 0.001      |
| 7                                  | 1      | 7      | $\leftarrow$ | 6     | 1       | 6       | 4888.4402           | -0.0006                                  | 0.001      |
| 7                                  | 1      | 6      | $\leftarrow$ | 6     | 1       | 5       | 5334.6405           | 0.0013                                   | 0.002      |
| 7                                  | 2      | 6      | $\leftarrow$ | 6     | 2       | 5       | 5182.1312           | 0.0014                                   | 0.002      |
| 7                                  | 2      | 5      | $\leftarrow$ | 6     | 2       | 4       | 5536.2505           | 0.0007                                   | 0.002      |
| 8                                  | 0      | 8      | $\leftarrow$ | 7     | 0       | 7       | 5576.3883           | 0.0005                                   | 0.001      |
| 8                                  | 1      | 8      | $\leftarrow$ | 7     | 1       | 7       | 5565.5717           | 0.0003                                   | 0.001      |
| 8                                  | 2      | 7      | $\leftarrow$ | 7     | 2       | 6       | 5887.8311           | 0.0003                                   | 0.002      |
| 9                                  | 1      | 9      | $\leftarrow$ | 8     | 1       | 8       | 6240.6380           | 0.0007                                   | 0.001      |

Table S34: Measured frequencies ( $\nu_{\text{obs.}}$ ) and residuals ( $\nu_{\text{obs.}} - \nu_{\text{calc.}}$ ) in MHz of the trihydrate of verbenone 3w-I with the O<sub>2</sub> atom substituted by a <sup>18</sup>O atom.

| $J'$                               | $K'_a$ | $K'_c$ | $\leftarrow$ | $J''$ | $K''_a$ | $K''_c$ | $\nu_{\text{obs.}}$ | $\nu_{\text{obs.}} - \nu_{\text{calc.}}$ | exp. error |
|------------------------------------|--------|--------|--------------|-------|---------|---------|---------------------|------------------------------------------|------------|
| <sup>a</sup> $R_{0,1}$ transitions |        |        |              |       |         |         |                     |                                          |            |
| 6                                  | 0      | 6      | $\leftarrow$ | 5     | 0       | 5       | 4236.6473           | 0.0002                                   | 0.002      |
| 6                                  | 1      | 5      | $\leftarrow$ | 5     | 1       | 4       | 4608.6941           | 0.0000                                   | 0.001      |
| 6                                  | 2      | 5      | $\leftarrow$ | 5     | 2       | 4       | 4442.0430           | 0.0004                                   | 0.002      |
| 6                                  | 3      | 4      | $\leftarrow$ | 5     | 3       | 3       | 4525.2313           | 0.0018                                   | 0.002      |
| 7                                  | 0      | 7      | $\leftarrow$ | 6     | 0       | 6       | 4900.7179           | 0.0001                                   | 0.001      |
| 7                                  | 1      | 7      | $\leftarrow$ | 6     | 1       | 6       | 4876.5891           | 0.0009                                   | 0.002      |
| 7                                  | 2      | 6      | $\leftarrow$ | 6     | 2       | 5       | 5157.4228           | 0.0003                                   | 0.002      |
| 7                                  | 2      | 5      | $\leftarrow$ | 6     | 2       | 4       | 5486.3212           | -0.0012                                  | 0.002      |
| 8                                  | 0      | 8      | $\leftarrow$ | 7     | 0       | 7       | 5566.6834           | 0.0001                                   | 0.001      |
| 8                                  | 1      | 8      | $\leftarrow$ | 7     | 1       | 7       | 5553.2079           | -0.0003                                  | 0.002      |
| 8                                  | 2      | 7      | $\leftarrow$ | 7     | 2       | 6       | 5863.3256           | -0.0011                                  | 0.002      |
| 9                                  | 0      | 9      | $\leftarrow$ | 8     | 0       | 8       | 6234.7525           | -0.0002                                  | 0.001      |
| 9                                  | 1      | 9      | $\leftarrow$ | 8     | 1       | 8       | 6227.5975           | -0.0006                                  | 0.002      |

Table S35: Measured frequencies ( $\nu_{\text{obs.}}$ ) and residuals ( $\nu_{\text{obs.}} - \nu_{\text{calc.}}$ ) in MHz of the trihydrate of verbenone 3w-I with the O<sub>3</sub> atom substituted by a <sup>18</sup>O atom.

| $J'$                               | $K'_a$ | $K'_c$ | $\leftarrow$ | $J''$ | $K''_a$ | $K''_c$ | $\nu_{\text{obs.}}$ | $\nu_{\text{obs.}} - \nu_{\text{calc.}}$ | exp. error |
|------------------------------------|--------|--------|--------------|-------|---------|---------|---------------------|------------------------------------------|------------|
| <sup>a</sup> $R_{0,1}$ transitions |        |        |              |       |         |         |                     |                                          |            |
| 5                                  | 0      | 5      | $\leftarrow$ | 4     | 0       | 4       | 3583.9785           | -0.0024                                  | 0.002      |
| 6                                  | 0      | 6      | $\leftarrow$ | 5     | 0       | 5       | 4250.8214           | -0.0009                                  | 0.002      |
| 6                                  | 2      | 4      | $\leftarrow$ | 5     | 2       | 3       | 4741.3769           | -0.0029                                  | 0.002      |
| 7                                  | 0      | 7      | $\leftarrow$ | 6     | 0       | 6       | 4917.6706           | -0.0008                                  | 0.002      |
| 7                                  | 1      | 7      | $\leftarrow$ | 6     | 1       | 6       | 4897.4016           | -0.0001                                  | 0.001      |
| 7                                  | 1      | 6      | $\leftarrow$ | 6     | 1       | 5       | 5339.7814           | 0.0000                                   | 0.002      |
| 7                                  | 2      | 6      | $\leftarrow$ | 6     | 2       | 5       | 5188.2904           | 0.0004                                   | 0.002      |
| 7                                  | 2      | 5      | $\leftarrow$ | 6     | 2       | 4       | 5538.7047           | 0.0011                                   | 0.002      |
| 8                                  | 0      | 8      | $\leftarrow$ | 7     | 0       | 7       | 5586.8342           | -0.0004                                  | 0.001      |
| 8                                  | 1      | 8      | $\leftarrow$ | 7     | 1       | 7       | 5576.0229           | 0.0005                                   | 0.001      |
| 8                                  | 2      | 6      | $\leftarrow$ | 7     | 2       | 5       | 6313.9068           | 0.0012                                   | 0.002      |
| 9                                  | 0      | 9      | $\leftarrow$ | 8     | 0       | 8       | 6258.0830           | 0.0001                                   | 0.002      |
| 9                                  | 1      | 9      | $\leftarrow$ | 8     | 1       | 8       | 6252.5905           | 0.0014                                   | 0.002      |
| 9                                  | 2      | 8      | $\leftarrow$ | 8     | 2       | 7       | 6592.8806           | 0.0035                                   | 0.005      |

Table S36: Measured frequencies ( $\nu_{\text{obs.}}$ ) and residuals ( $\nu_{\text{obs.}} - \nu_{\text{calc.}}$ ) in MHz of the trihydrate of verbenone 3w-I with the O<sub>1</sub> and O<sub>2</sub> atoms substituted by <sup>18</sup>O atoms.

| $J'$                                      | $K'_a$ | $K'_c$ | $\leftarrow$ | $J''$ | $K''_a$ | $K''_c$ | $\nu_{\text{obs.}}$ | $\nu_{\text{obs.}} - \nu_{\text{calc.}}$ | exp. error |
|-------------------------------------------|--------|--------|--------------|-------|---------|---------|---------------------|------------------------------------------|------------|
| <sup>a</sup> R <sub>0,1</sub> transitions |        |        |              |       |         |         |                     |                                          |            |
| 5                                         | 0      | 5      | $\leftarrow$ | 4     | 0       | 4       | 3510.6965           | 0.0007                                   | 0.002      |
| 5                                         | 1      | 5      | $\leftarrow$ | 4     | 1       | 4       | 3452.5953           | 0.0019                                   | 0.002      |
| 5                                         | 1      | 4      | $\leftarrow$ | 4     | 1       | 3       | 3818.5164           | 0.0012                                   | 0.002      |
| 5                                         | 2      | 3      | $\leftarrow$ | 4     | 2       | 2       | 3833.0064           | 0.0029                                   | 0.002      |
| 6                                         | 0      | 6      | $\leftarrow$ | 5     | 0       | 5       | 4163.7318           | 0.0007                                   | 0.002      |
| 6                                         | 1      | 6      | $\leftarrow$ | 5     | 1       | 5       | 4125.2587           | 0.0008                                   | 0.002      |
| 6                                         | 1      | 5      | $\leftarrow$ | 5     | 1       | 4       | 4538.1608           | 0.0000                                   | 0.002      |
| 6                                         | 2      | 5      | $\leftarrow$ | 5     | 2       | 4       | 4372.5169           | 0.0021                                   | 0.002      |
| 6                                         | 2      | 4      | $\leftarrow$ | 5     | 2       | 3       | 4627.3524           | -0.0018                                  | 0.002      |
| 7                                         | 0      | 7      | $\leftarrow$ | 6     | 0       | 6       | 4815.9617           | 0.0003                                   | 0.001      |
| 7                                         | 1      | 7      | $\leftarrow$ | 6     | 1       | 6       | 4793.1420           | 0.0008                                   | 0.002      |
| 7                                         | 1      | 6      | $\leftarrow$ | 6     | 1       | 5       | 5230.9278           | 0.0002                                   | 0.002      |
| 7                                         | 2      | 6      | $\leftarrow$ | 6     | 2       | 5       | 5075.5732           | 0.0005                                   | 0.002      |
| 7                                         | 2      | 5      | $\leftarrow$ | 6     | 2       | 4       | 5409.2410           | -0.0018                                  | 0.002      |
| 8                                         | 0      | 8      | $\leftarrow$ | 7     | 0       | 7       | 5470.2187           | 0.0003                                   | 0.001      |
| 8                                         | 1      | 8      | $\leftarrow$ | 7     | 1       | 7       | 5457.6467           | 0.0000                                   | 0.002      |
| 8                                         | 1      | 7      | $\leftarrow$ | 7     | 1       | 6       | 5898.0981           | -0.0005                                  | 0.002      |
| 8                                         | 2      | 7      | $\leftarrow$ | 7     | 2       | 6       | 5768.9711           | -0.0005                                  | 0.001      |
| 9                                         | 0      | 9      | $\leftarrow$ | 8     | 0       | 8       | 6126.5708           | -0.0018                                  | 0.002      |
| 10                                        | 1      | 10     | $\leftarrow$ | 9     | 1       | 9       | 6781.0333           | -0.0026                                  | 0.002      |



Table S37: Measured frequencies ( $\nu_{\text{obs.}}$ ) and residuals ( $\nu_{\text{obs.}} - \nu_{\text{calc.}}$ ) in MHz of the trihydrate of verbenone 3w-I with the O<sub>1</sub> and O<sub>3</sub> atoms substituted by <sup>18</sup>O atoms.

| $J'$                                      | $K'_a$ | $K'_c$ | $\leftarrow$ | $J''$ | $K''_a$ | $K''_c$ | $\nu_{\text{obs.}}$ | $\nu_{\text{obs.}} - \nu_{\text{calc.}}$ | exp. error |
|-------------------------------------------|--------|--------|--------------|-------|---------|---------|---------------------|------------------------------------------|------------|
| <sup>a</sup> R <sub>0,1</sub> transitions |        |        |              |       |         |         |                     |                                          |            |
| 5                                         | 1      | 5      | $\leftarrow$ | 4     | 1       | 4       | 3468.4493           | 0.0000                                   | 0.002      |
| 5                                         | 1      | 4      | $\leftarrow$ | 4     | 1       | 3       | 3846.3826           | -0.0006                                  | 0.002      |
| 5                                         | 2      | 4      | $\leftarrow$ | 4     | 2       | 3       | 3685.3683           | -0.0036                                  | 0.005      |
| 6                                         | 0      | 6      | $\leftarrow$ | 5     | 0       | 5       | 4176.3938           | -0.0007                                  | 0.002      |
| 6                                         | 1      | 6      | $\leftarrow$ | 5     | 1       | 5       | 4142.7613           | 0.0000                                   | 0.001      |
| 6                                         | 2      | 5      | $\leftarrow$ | 5     | 2       | 4       | 4400.4235           | -0.0002                                  | 0.002      |
| 7                                         | 0      | 7      | $\leftarrow$ | 6     | 0       | 6       | 4831.2327           | -0.0002                                  | 0.002      |
| 7                                         | 1      | 7      | $\leftarrow$ | 6     | 1       | 6       | 4812.2600           | -0.0002                                  | 0.001      |
| 7                                         | 1      | 6      | $\leftarrow$ | 6     | 1       | 5       | 5253.2337           | -0.0008                                  | 0.002      |
| 7                                         | 2      | 6      | $\leftarrow$ | 6     | 2       | 5       | 5104.9848           | 0.0000                                   | 0.001      |
| 7                                         | 2      | 5      | $\leftarrow$ | 6     | 2       | 4       | 5460.7198           | -0.0001                                  | 0.002      |
| 8                                         | 0      | 8      | $\leftarrow$ | 7     | 0       | 7       | 5488.4789           | -0.0001                                  | 0.001      |
| 8                                         | 1      | 8      | $\leftarrow$ | 7     | 1       | 7       | 5478.5149           | 0.0002                                   | 0.001      |
| 8                                         | 1      | 7      | $\leftarrow$ | 7     | 1       | 6       | 5916.1412           | 0.0005                                   | 0.002      |
| 8                                         | 2      | 7      | $\leftarrow$ | 7     | 2       | 6       | 5799.1026           | 0.0007                                   | 0.002      |
| 8                                         | 2      | 6      | $\leftarrow$ | 7     | 2       | 5       | 6222.0344           | 0.0005                                   | 0.002      |
| 9                                         | 0      | 9      | $\leftarrow$ | 8     | 0       | 8       | 6147.7762           | 0.0000                                   | 0.002      |
| 9                                         | 2      | 8      | $\leftarrow$ | 8     | 2       | 7       | 6483.7525           | 0.0009                                   | 0.002      |
| 10                                        | 0      | 10     | $\leftarrow$ | 9     | 0       | 9       | 6808.3603           | -0.0002                                  | 0.002      |
| 10                                        | 1      | 10     | $\leftarrow$ | 9     | 1       | 9       | 6805.9476           | 0.0004                                   | 0.002      |

Table S38: Measured frequencies ( $\nu_{\text{obs.}}$ ) and residuals ( $\nu_{\text{obs.}} - \nu_{\text{calc.}}$ ) in MHz of the trihydrate of verbenone 3w-I with the O<sub>2</sub> and O<sub>3</sub> atoms substituted by <sup>18</sup>O atoms.

| $J'$                                      | $K'_a$ | $K'_c$ | $\leftarrow$ | $J''$ | $K''_a$ | $K''_c$ | $\nu_{\text{obs.}}$ | $\nu_{\text{obs.}} - \nu_{\text{calc.}}$ | exp. error |
|-------------------------------------------|--------|--------|--------------|-------|---------|---------|---------------------|------------------------------------------|------------|
| <sup>a</sup> R <sub>0,1</sub> transitions |        |        |              |       |         |         |                     |                                          |            |
| 6                                         | 0      | 6      | $\leftarrow$ | 5     | 0       | 5       | 4170.8338           | 0.0007                                   | 0.001      |
| 6                                         | 1      | 6      | $\leftarrow$ | 5     | 1       | 5       | 4132.4389           | 0.0007                                   | 0.002      |
| 6                                         | 1      | 5      | $\leftarrow$ | 5     | 1       | 4       | 4541.3161           | -0.0010                                  | 0.002      |
| 6                                         | 2      | 5      | $\leftarrow$ | 5     | 2       | 4       | 4377.0531           | 0.0014                                   | 0.002      |
| 6                                         | 2      | 4      | $\leftarrow$ | 5     | 2       | 3       | 4628.6562           | 0.0000                                   | 0.002      |
| 7                                         | 0      | 7      | $\leftarrow$ | 6     | 0       | 6       | 4824.5846           | -0.0002                                  | 0.002      |
| 7                                         | 1      | 7      | $\leftarrow$ | 6     | 1       | 6       | 4801.7535           | 0.0004                                   | 0.001      |
| 7                                         | 1      | 6      | $\leftarrow$ | 6     | 1       | 5       | 5235.5801           | 0.0010                                   | 0.002      |
| 7                                         | 2      | 6      | $\leftarrow$ | 6     | 2       | 5       | 5081.2395           | 0.0008                                   | 0.002      |
| 7                                         | 2      | 5      | $\leftarrow$ | 6     | 2       | 4       | 5410.9231           | 0.0000                                   | 0.002      |
| 8                                         | 0      | 8      | $\leftarrow$ | 7     | 0       | 7       | 5480.3218           | -0.0002                                  | 0.002      |
| 8                                         | 1      | 8      | $\leftarrow$ | 7     | 1       | 7       | 5467.7140           | 0.0004                                   | 0.002      |
| 8                                         | 1      | 7      | $\leftarrow$ | 7     | 1       | 6       | 5904.4939           | -0.0005                                  | 0.002      |
| 8                                         | 2      | 7      | $\leftarrow$ | 7     | 2       | 6       | 5775.8899           | 0.0000                                   | 0.002      |
| 8                                         | 2      | 6      | $\leftarrow$ | 7     | 2       | 5       | 6173.9521           | -0.0004                                  | 0.002      |
| 9                                         | 0      | 9      | $\leftarrow$ | 8     | 0       | 8       | 6138.1365           | -0.0020                                  | 0.002      |
| 9                                         | 1      | 9      | $\leftarrow$ | 8     | 1       | 8       | 6131.5139           | -0.0014                                  | 0.002      |
| 9                                         | 2      | 8      | $\leftarrow$ | 8     | 2       | 7       | 6461.5890           | -0.0011                                  | 0.002      |

Table S39: Measured frequencies ( $\nu_{\text{obs.}}$ ) and residuals ( $\nu_{\text{obs.}} - \nu_{\text{calc.}}$ ) in MHz of the trihydrate of verbenone 3w-I with all oxygen atoms of water substituted by  $^{18}\text{O}$  atoms.

| $J'$                       | $K'_a$ | $K'_c$ | $\leftarrow$ | $J''$ | $K''_a$ | $K''_c$ | $\nu_{\text{obs.}}$ | $\nu_{\text{obs.}} - \nu_{\text{calc.}}$ | exp. error |
|----------------------------|--------|--------|--------------|-------|---------|---------|---------------------|------------------------------------------|------------|
| ${}^a R_{0,1}$ transitions |        |        |              |       |         |         |                     |                                          |            |
| 5                          | 0      | 5      | $\leftarrow$ | 4     | 0       | 4       | 3457.4936           | 0.0010                                   | 0.002      |
| 5                          | 1      | 5      | $\leftarrow$ | 4     | 1       | 4       | 3401.4687           | 0.0004                                   | 0.002      |
| 5                          | 1      | 4      | $\leftarrow$ | 4     | 1       | 3       | 3766.1262           | -0.0006                                  | 0.001      |
| 5                          | 2      | 4      | $\leftarrow$ | 4     | 2       | 3       | 3608.8873           | 0.0022                                   | 0.005      |
| 5                          | 2      | 3      | $\leftarrow$ | 4     | 2       | 2       | 3784.5738           | -0.0029                                  | 0.002      |
| 6                          | 0      | 6      | $\leftarrow$ | 5     | 0       | 5       | 4100.2490           | -0.0005                                  | 0.001      |
| 6                          | 1      | 6      | $\leftarrow$ | 5     | 1       | 5       | 4063.7031           | 0.0001                                   | 0.001      |
| 6                          | 1      | 5      | $\leftarrow$ | 5     | 1       | 4       | 4473.9399           | -0.0002                                  | 0.002      |
| 6                          | 2      | 5      | $\leftarrow$ | 5     | 2       | 4       | 4310.7364           | 0.0005                                   | 0.002      |
| 6                          | 2      | 4      | $\leftarrow$ | 5     | 2       | 3       | 4568.2703           | -0.0010                                  | 0.002      |
| 6                          | 3      | 3      | $\leftarrow$ | 5     | 3       | 2       | 4450.0472           | 0.0014                                   | 0.002      |
| 7                          | 0      | 7      | $\leftarrow$ | 6     | 0       | 6       | 4742.5667           | -0.0001                                  | 0.001      |
| 7                          | 1      | 7      | $\leftarrow$ | 6     | 1       | 6       | 4721.2042           | 0.0002                                   | 0.001      |
| 7                          | 1      | 6      | $\leftarrow$ | 6     | 1       | 5       | 5154.3864           | 0.0002                                   | 0.002      |
| 7                          | 2      | 6      | $\leftarrow$ | 6     | 2       | 5       | 5002.9477           | 0.0005                                   | 0.001      |
| 7                          | 2      | 5      | $\leftarrow$ | 6     | 2       | 4       | 5338.6831           | -0.0010                                  | 0.002      |
| 7                          | 3      | 5      | $\leftarrow$ | 6     | 3       | 4       | 5129.0524           | 0.0012                                   | 0.002      |
| 7                          | 3      | 4      | $\leftarrow$ | 6     | 3       | 3       | 5235.2150           | -0.0013                                  | 0.002      |
| 8                          | 0      | 8      | $\leftarrow$ | 7     | 0       | 7       | 5387.0114           | -0.0002                                  | 0.001      |
| 8                          | 1      | 8      | $\leftarrow$ | 7     | 1       | 7       | 5375.4058           | 0.0002                                   | 0.001      |
| 8                          | 1      | 7      | $\leftarrow$ | 7     | 1       | 6       | 5809.4458           | 0.0002                                   | 0.002      |
| 8                          | 2      | 7      | $\leftarrow$ | 7     | 2       | 6       | 5685.3952           | 0.0003                                   | 0.002      |
| 8                          | 2      | 6      | $\leftarrow$ | 7     | 2       | 5       | 6088.7523           | -0.0007                                  | 0.002      |
| 8                          | 3      | 6      | $\leftarrow$ | 7     | 3       | 5       | 5853.8559           | 0.0013                                   | 0.002      |
| 8                          | 3      | 5      | $\leftarrow$ | 7     | 3       | 4       | 6035.3858           | 0.0001                                   | 0.001      |
| 9                          | 0      | 9      | $\leftarrow$ | 8     | 0       | 8       | 6033.5212           | -0.0003                                  | 0.001      |
| 9                          | 1      | 9      | $\leftarrow$ | 8     | 1       | 8       | 6027.5198           | 0.0000                                   | 0.001      |
| 9                          | 1      | 8      | $\leftarrow$ | 8     | 1       | 7       | 6448.5572           | 0.0000                                   | 0.002      |

| $J'$           | $K'_a$ | $K'_c$ | $\leftarrow$ | $J''$ | $K''_a$ | $K''_c$ | $\nu_{\text{obs.}}$ | $\nu_{\text{obs.}} - \nu_{\text{calc.}}$ | exp. error |
|----------------|--------|--------|--------------|-------|---------|---------|---------------------|------------------------------------------|------------|
| 9              | 2      | 8      | $\leftarrow$ | 8     | 2       | 7       | 6358.7775           | -0.0002                                  | 0.002      |
| 9              | 2      | 7      | $\leftarrow$ | 8     | 2       | 6       | 6813.0330           | -0.0008                                  | 0.002      |
| 9              | 3      | 7      | $\leftarrow$ | 8     | 3       | 6       | 6569.8981           | 0.0009                                   | 0.002      |
| 9              | 3      | 6      | $\leftarrow$ | 8     | 3       | 5       | 6839.0059           | -0.0004                                  | 0.002      |
| 10             | 0      | 10     | $\leftarrow$ | 9     | 0       | 9       | 6681.4103           | -0.0018                                  | 0.002      |
| 10             | 1      | 9      | $\leftarrow$ | 9     | 1       | 8       | 7082.8970           | 0.0008                                   | 0.002      |
| 10             | 2      | 9      | $\leftarrow$ | 9     | 2       | 8       | 7024.4795           | 0.0015                                   | 0.002      |
| 10             | 3      | 8      | $\leftarrow$ | 9     | 3       | 7       | 7275.5984           | 0.0005                                   | 0.002      |
| 11             | 0      | 11     | $\leftarrow$ | 10    | 0       | 10      | 7330.0979           | -0.0024                                  | 0.002      |
| 11             | 1      | 11     | $\leftarrow$ | 10    | 1       | 10      | 7328.6405           | -0.0008                                  | 0.002      |
| 11             | 1      | 10     | $\leftarrow$ | 10    | 1       | 9       | 7719.2776           | 0.0004                                   | 0.002      |
| 11             | 2      | 10     | $\leftarrow$ | 10    | 2       | 9       | 7684.2409           | 0.0014                                   | 0.002      |
| ${}^bR_{-1,1}$ |        |        |              |       |         |         |                     |                                          |            |
| 8              | 1      | 7      | $\leftarrow$ | 7     | 2       | 6       | 5460.3284           | 0.0012                                   | 0.002      |
| 9              | 0      | 9      | $\leftarrow$ | 8     | 1       | 8       | 6021.7622           | 0.0002                                   | 0.002      |
| ${}^bR_{1,1}$  |        |        |              |       |         |         |                     |                                          |            |
| 7              | 1      | 7      | $\leftarrow$ | 6     | 0       | 6       | 4765.9327           | 0.0001                                   | 0.002      |
| 8              | 1      | 8      | $\leftarrow$ | 7     | 0       | 7       | 5398.7714           | 0.0001                                   | 0.002      |
| 9              | 1      | 9      | $\leftarrow$ | 8     | 0       | 8       | 6039.2795           | 0.0001                                   | 0.002      |

Table S40: Decomposition of the interaction energy between verbenone and water as calculated at the SAPT0 / jun-cc-PVDZ level of theory, values in  $\text{kJ mol}^{-1}$

|          | $E_{\text{elec}}$ | $E_{\text{exch}}$ | $E_{\text{ind}}$ | $E_{\text{disp}}$ | $E_{\text{SAPT0}}$ | $E_{\text{BSSE}}$ |
|----------|-------------------|-------------------|------------------|-------------------|--------------------|-------------------|
| 1w-I     | -47.69            | 40.16             | -13.44           | -13.62            | -34.58             | -25.22            |
| 1w-II    | -51.02            | 42.51             | -14.30           | -11.30            | -34.11             | -25.61            |
| 2w-I     | -72.93            | 62.65             | -25.15           | -19.15            | -54.59             | -42.17            |
| 2w-II(a) | -72.14            | 58.51             | -23.61           | -15.52            | -52.77             | -40.71            |
